# Supplementary material
Source: publisher figshare collection journal article supplement (https://acs.figshare.com/ndownloader/files/4001107)
Supplement: Supplementary file 1 [file 4001107]

## Sheet: Table S1
Table S1. List of non-redundant peptides detected in the analysis of the low molecular weight proteome from nine different Roseobacter strains.
Sample file	Roseobacter strain	MS/MS query	m/z observed	z	Mr (experimental)	Mr (calculated)	Delta (ppm)	Peptide score	start	stop	-1	Peptide sequence	+1	Modifications	Miss-cleavages	Number of spectra assigned	Protein NCBI reference
F056010	O. batsensis HTCC2597	1845	870.479	1.99769	1738.94	1738.94	1.90173	41.72	167	183	R	ALVTLAENPAAAMQALR	A		0	2	ZP_00997477.1
F056010	O. batsensis HTCC2597	3227	764.041	2.99604	2289.1	2289.1	0.551746	21	2	22	M	AFELPDLPYAHDALADLGMSK	E	Oxidation (M) [19]	0	1	ZP_00997483.1
F056010	O. batsensis HTCC2597	185	531.267	1.99621	1060.52	1060.52	0.133897	51.17	43	52	K	AIAGTEWEGK	S		0	2	ZP_00997483.1
F056010	O. batsensis HTCC2597	2383	641.647	2.99529	1921.92	1921.92	1.45428	32.32	35	52	K	AYVDNGNKAIAGTEWEGK	S		1	2	ZP_00997483.1
F056010	O. batsensis HTCC2597	368	594.312	1.99661	1186.61	1186.61	0.503114	47.89	189	198	K	LVNWENVASR	M		0	2	ZP_00997483.1
F056010	O. batsensis HTCC2597	3945	696.864	3.99422	2783.43	2783.42	0.631596	17.18	73	100	R	ARLAATLAGLTETLASSHALAADMSDAR	A		1	1	ZP_00997484.1
F056010	O. batsensis HTCC2597	843	695.845	1.9971	1389.68	1389.67	1.1974	90.44	25	38	R	GDLSDATVSDALAR	A		0	2	ZP_00997484.1
F056010	O. batsensis HTCC2597	2766	688.025	2.99561	2061.05	2061.05	0.353218	61.17	19	38	R	GMITLRGDLSDATVSDALAR	A		1	2	ZP_00997484.1
F056010	O. batsensis HTCC2597	2827	693.356	2.99564	2077.05	2077.05	-0.428974	44.12	19	38	R	GMITLRGDLSDATVSDALAR	A	Oxidation (M) [2]	1	2	ZP_00997484.1
F056010	O. batsensis HTCC2597	3701	853.103	2.99646	2556.29	2556.29	0.840282	77.08	75	100	R	LAATLAGLTETLASSHALAADMSDAR	A		0	7	ZP_00997484.1
F056010	O. batsensis HTCC2597	3719	858.435	2.99648	2572.28	2572.28	1.13868	63.69	75	100	R	LAATLAGLTETLASSHALAADMSDAR	A	Oxidation (M) [22]	0	4	ZP_00997484.1
F056010	O. batsensis HTCC2597	1377	796.412	1.99747	1590.81	1590.81	0.928459	68.98	119	133	R	LAPVDMATFATGEIR	R		0	4	ZP_00997484.1
F056010	O. batsensis HTCC2597	1884	874.461	1.9977	1746.91	1746.91	-0.245004	24.05	119	134	R	LAPVDMATFATGEIRR	T		1	1	ZP_00997484.1
F056010	O. batsensis HTCC2597	1796	862.975	1.99767	1723.94	1723.93	1.14448	50.44	58	72	R	LAWMSPDEALLILPR	A		0	4	ZP_00997484.1
F056010	O. batsensis HTCC2597	1851	580.984	2.9948	1739.93	1739.93	0.734513	19.5	58	72	R	LAWMSPDEALLILPR	A	Oxidation (M) [4]	0	1	ZP_00997484.1
F056010	O. batsensis HTCC2597	1125	757.421	1.99734	1512.83	1512.83	1.10654	51.7	105	118	R	LTGEDAALREVLAR	L		1	4	ZP_00997484.1
F056010	O. batsensis HTCC2597	2269	627.685	2.99519	1880.03	1880.03	-0.217017	20.83	57	72	K	RLAWMSPDEALLILPR	A		1	1	ZP_00997484.1
F056010	O. batsensis HTCC2597	1084	498.597	2.99394	1492.77	1492.77	1.19041	49.08	163	176	R	YAFDLLAQAAASPR	I		0	4	ZP_00997484.1
F056010	O. batsensis HTCC2597	4101	1007.51	2.997	3019.51	3019.51	0.109951	59.76	71	97	R	DTATLEVFGTYPAQSTRPPEDLLETIR	A		0	2	ZP_00997486.1
F056010	O. batsensis HTCC2597	3318	777.366	2.99611	2329.08	2329.07	1.27132	45.89	29	49	R	EGPGSDDAALEGYLFHRENPR	G		1	2	ZP_00997486.1
F056010	O. batsensis HTCC2597	4190	635.499	4.99207	3172.46	3172.46	0.750838	27.04	1	28	-	MLILTCPCCGVTAEETEFHGGGEAHLKR	E		1	4	ZP_00997486.1
F056010	O. batsensis HTCC2597	4200	638.697	4.99211	3188.45	3188.45	-0.16842	15.49	1	28	-	MLILTCPCCGVTAEETEFHGGGEAHLKR	E	Oxidation (M) [1]	1	1	ZP_00997486.1
F056010	O. batsensis HTCC2597	664	439.893	2.99313	1316.66	1316.66	0.437472	33.55	2	13	M	SGDDLLEGDIKR	A		1	1	ZP_00997498.1
F056010	O. batsensis HTCC2597	3362	787.068	2.99616	2358.18	2358.18	2.11222	40.31	39	60	R	SVGELAQACGVAQPTMSQQLKR	L		1	2	ZP_00997498.1
F056010	O. batsensis HTCC2597	808	689.359	1.99708	1376.7	1376.7	1.07068	33.12	135	147	R	AMDLADIPKLFSG	-		1	2	ZP_00997544.1
F056010	O. batsensis HTCC2597	3934	922.452	2.99672	2764.34	2764.33	1.59315	32.24	69	95	R	GAPEPAPPELVVAGCHVTYMISGEGAR	T		0	2	ZP_00997601.1
F056010	O. batsensis HTCC2597	837	694.905	1.9971	1387.8	1387.79	1.8007	18.65	49	61	K	NAPNPPLLNGLLR	H		0	2	ZP_00997601.1
F056010	O. batsensis HTCC2597	1558	823.51	1.99755	1645.01	1645	1.06808	43.11	54	69	R	IVPAAKLPQNVVAIGR	A		1	2	ZP_00997602.1
F056010	O. batsensis HTCC2597	194	533.823	1.99623	1065.63	1065.63	1.29219	60.37	60	69	K	LPQNVVAIGR	A		0	2	ZP_00997602.1
F056010	O. batsensis HTCC2597	2891	527.786	3.99237	2107.11	2107.11	0.350242	32.78	26	44	R	RLEALAEGAIQRNPDLADR	L		2	1	ZP_00997602.1
F056010	O. batsensis HTCC2597	1355	529.282	2.99429	1584.83	1584.83	-0.588077	32.98	83	96	K	RVTPVFPEDADIAR	G		1	2	ZP_00997602.1
F056010	O. batsensis HTCC2597	238	365.561	2.99173	1093.66	1093.66	-0.192016	33.76	129	138	R	VLTVLHVASR	D		0	2	ZP_00997602.1
F056010	O. batsensis HTCC2597	2720	678.373	2.99555	2032.1	2032.1	0.475371	29.8	129	147	R	VLTVLHVASRDVPEGLEAQ	-		1	2	ZP_00997602.1
F056010	O. batsensis HTCC2597	937	715.37	1.99718	1428.72	1428.72	-0.0356962	47	84	96	R	VTPVFPEDADIAR	G		0	2	ZP_00997602.1
F056010	O. batsensis HTCC2597	132	501.773	1.99599	1001.53	1001.53	-0.956534	35.71	17	25	K	VVIGADCLR	R		0	2	ZP_00997602.1
F056010	O. batsensis HTCC2597	2174	927.947	1.99783	1853.88	1853.88	1.9203	83.44	193	210	K	SAAELAAEEAEHVSGLDR	-		0	4	ZP_00997650.1
F056010	O. batsensis HTCC2597	76	472.276	1.99573	942.538	942.539	-0.149596	28.24	33	40	R	EVQIVDLK	S		0	2	ZP_00997671.1
F056010	O. batsensis HTCC2597	1390	797.962	1.99748	1593.91	1593.91	-0.102892	56.45	61	75	R	GENVLPLGVLTDLVR	S		0	2	ZP_00997671.1
F056010	O. batsensis HTCC2597	3806	883.433	2.99658	2647.28	2647.28	-0.337706	27.27	10	32	R	LYNTETSDYVTLEDIAGFIRDGR	E		1	2	ZP_00997671.1
F056010	O. batsensis HTCC2597	1128	758.311	1.99734	1514.61	1514.61	1.12637	76.32	103	115	K	MMENMTAMNPMSK	M		0	1	ZP_00997671.1
F056010	O. batsensis HTCC2597	2071	913.436	1.99779	1824.86	1824.85	1.75192	95.07	116	131	K	MPGFEAMQAQQEAFLK	A		0	2	ZP_00997671.1
F056010	O. batsensis HTCC2597	3689	850.385	2.99645	2548.13	2548.13	1.78405	39.16	81	105	K	AMSDFATASAEMAAENMAAFAEIAK	K		0	1	ZP_00997673.1
F056010	O. batsensis HTCC2597	3846	670.063	3.99399	2676.22	2676.22	-0.592626	42.31	81	106	K	AMSDFATASAEMAAENMAAFAEIAKK	A		1	4	ZP_00997673.1
F056010	O. batsensis HTCC2597	3528	821.385	2.99632	2461.13	2461.13	0.0426633	43.72	2	23	M	ANTQDFTTIMKDMMGAFPVDTK	S		1	2	ZP_00997673.1
F056010	O. batsensis HTCC2597	3916	914.101	2.99669	2739.28	2739.28	2.26264	63.29	107	132	K	AQTETVELMMAAGKDMAEETSAAVQK	A		1	4	ZP_00997673.1
F056010	O. batsensis HTCC2597	3998	717.851	3.99439	2867.37	2867.37	1.20912	41.94	106	132	K	KAQTETVELMMAAGKDMAEETSAAVQK	A		2	1	ZP_00997673.1
F056010	O. batsensis HTCC2597	1938	589.639	2.99488	1765.89	1765.89	1.28773	25.21	65	80	R	MADLTKVKSEPADYAK	A		2	2	ZP_00997673.1
F056010	O. batsensis HTCC2597	4182	1053.52	2.99713	3157.54	3157.53	1.1262	32.32	159	190	R	VLQGKPVPEDVFGVPAPSDSHANAAAAGEAQE	-		0	2	ZP_00997684.1
F056010	O. batsensis HTCC2597	1507	818.374	1.99754	1634.73	1634.73	0.399454	53.32	331	345	R	AADLYKSMMSDLGYA	-		1	2	ZP_00997685.1
F056010	O. batsensis HTCC2597	1323	788.387	1.99744	1574.76	1574.76	-0.722649	41.96	38	51	K	DIADQQKEVMAEAK	A		1	3	ZP_00997694.1
F056010	O. batsensis HTCC2597	3554	829.383	2.99636	2485.13	2485.12	0.688094	28.47	70	91	R	DKDDIAEEEAVLEMYKEALGMS	-		2	2	ZP_00997694.1
F056010	O. batsensis HTCC2597	3586	834.714	2.99638	2501.12	2501.12	0.876008	23.02	70	91	R	DKDDIAEEEAVLEMYKEALGMS	-	Oxidation (M) [21]	2	2	ZP_00997694.1
F056010	O. batsensis HTCC2597	2983	1081.06	1.99814	2160.1	2160.1	1.12588	24.03	53	71	R	LLDELTTEAVESRFENVPV	-		1	2	ZP_00997696.1
F056010	O. batsensis HTCC2597	1231	772.885	1.99739	1543.76	1543.76	0.178137	37.63	109	124	R	AAEGMPADEILATAGK	A		0	2	ZP_00997700.1
F056010	O. batsensis HTCC2597	3693	852.092	2.99645	2553.25	2553.25	0.207578	29.17	56	78	R	DAGLEFVDIPLTHQTMTPENIGR	Q		0	2	ZP_00997700.1
F056010	O. batsensis HTCC2597	3581	834.372	2.99638	2500.09	2500.09	1.43635	38.75	425	448	R	AQVEYAPDHPMFAGGNLGQCNPGA	-		0	2	ZP_00997705.1
F056010	O. batsensis HTCC2597	3153	753.722	2.99599	2258.14	2258.14	0.370216	28.35	405	424	R	GKENPTSEFDLLEVVEVTPR	A		1	2	ZP_00997705.1
F056010	O. batsensis HTCC2597	709	667.878	1.99698	1333.74	1333.74	0.916221	44.53	288	298	K	QFEIVVPLFSR	L		0	2	ZP_00997705.1
F056010	O. batsensis HTCC2597	4072	988.472	2.99694	2962.39	2962.4	-3.83844	45.52	619	646	K	IAENDYGALGDTSTLADPSVVDDLIENR	M		0	1	ZP_00997710.1
F056010	O. batsensis HTCC2597	4162	1031.17	2.99707	3090.5	3090.5	1.25352	54.14	618	646	R	KIAENDYGALGDTSTLADPSVVDDLIENR	M		1	2	ZP_00997710.1
F056010	O. batsensis HTCC2597	2876	1052.08	1.99809	2102.14	2102.14	0.130343	33.13	586	605	R	TEIGPIASPDLIQWAPGLPK	T		0	2	ZP_00997710.1
F056010	O. batsensis HTCC2597	1784	860.955	1.99766	1719.89	1719.89	0.255248	75.1	28	45	R	IAGIGGSPAGYPLSASFR	S		0	2	ZP_00997716.1
F056010	O. batsensis HTCC2597	32	443.279	1.99546	884.544	884.544	-0.315417	47.21	2	9	M	GILNSLLR	A		0	1	ZP_00997717.1
F056010	O. batsensis HTCC2597	1914	880.885	1.99771	1759.76	1759.75	0.76147	88.71	32	48	K	VGEDDAGNTFYTTADGK	K		0	2	ZP_00997717.1
F056010	O. batsensis HTCC2597	2740	682.324	2.99557	2043.95	2043.95	0.197657	49.07	32	50	K	VGEDDAGNTFYTTADGKKR	W		2	4	ZP_00997717.1
F056010	O. batsensis HTCC2597	846	697.838	1.99711	1393.66	1393.66	-0.394644	60.67	51	62	R	WVIYNGEAEASR	V		0	1	ZP_00997717.1
F056010	O. batsensis HTCC2597	30	436.219	1.99538	870.423	870.424	-0.809951	27.78	26	32	R	AYDIFSR	L		0	2	ZP_00997720.1
F056010	O. batsensis HTCC2597	406	606.812	1.99668	1211.61	1211.61	0.470449	66.83	140	150	R	GQATDIMIHAR	H		0	4	ZP_00997720.1
F056010	O. batsensis HTCC2597	1777	858.914	1.99765	1715.81	1715.81	0.906277	61.99	166	180	K	HTGQDFETVVDALER	D		0	4	ZP_00997720.1
F056010	O. batsensis HTCC2597	4222	808.683	3.99502	3230.7	3230.7	-0.00990497	35.91	38	67	R	IIFVSGPVHDGMSSLIVAQLLHLEAENPTK	D	Oxidation (M) [12]	0	2	ZP_00997720.1
F056010	O. batsensis HTCC2597	3249	1151.13	1.99825	2300.24	2300.23	1.30291	103.06	97	121	K	VGTLVIGQAASMGSLLLAGGAAGMR	Y		0	4	ZP_00997720.1
F056010	O. batsensis HTCC2597	3281	773.085	2.99609	2316.23	2316.23	1.51194	36.89	97	121	K	VGTLVIGQAASMGSLLLAGGAAGMR	Y	Oxidation (M) [12]	0	2	ZP_00997720.1
F056010	O. batsensis HTCC2597	3324	778.416	2.99612	2332.23	2332.22	1.06465	50.94	97	121	K	VGTLVIGQAASMGSLLLAGGAAGMR	Y	Oxidation (M) [12], Oxidation (M) [24]	0	2	ZP_00997720.1
F056010	O. batsensis HTCC2597	3283	1159.12	1.99826	2316.24	2316.23	2.62409	97.25	97	121	K	VGTLVIGQAASMGSLLLAGGAAGMR	Y	Oxidation (M) [24]	0	4	ZP_00997720.1
F056010	O. batsensis HTCC2597	2633	668.332	2.99548	2001.98	2001.97	1.00851	24.48	122	139	R	YALPNAEIMVHQPSGGYR	G		0	2	ZP_00997720.1
F056010	O. batsensis HTCC2597	140	507.285	1.99603	1012.55	1012.56	-0.64194	24.16	128	136	R	VTVEAPELR	L		0	2	ZP_00997725.1
F056010	O. batsensis HTCC2597	3039	727.382	2.99585	2179.12	2179.12	0.259737	48.41	169	191	K	DGSAIGLAEGLGETLAHVGGSLR	D		0	2	ZP_00997781.1
F056010	O. batsensis HTCC2597	1704	846.489	1.99762	1690.96	1690.96	1.36136	33.19	99	114	R	AAIGRPVENLLPLLTD	-		0	2	ZP_00997788.1
F056010	O. batsensis HTCC2597	1273	519.626	2.99418	1555.86	1555.86	-0.38821	25.35	14	27	R	QALALIESHGHRPK	I		0	2	ZP_00997788.1
F056010	O. batsensis HTCC2597	2848	696.397	2.99566	2086.17	2086.17	0.498522	38.84	21	40	R	DAALAALVGRVPYAQFLGVR	F		1	2	ZP_00997790.1
F056010	O. batsensis HTCC2597	480	628.831	1.9968	1255.65	1255.64	1.43034	49.62	111	120	K	TIDFTIDYLR	S		0	2	ZP_00997790.1
F056010	O. batsensis HTCC2597	2481	653.332	2.99537	1956.98	1956.98	0.239145	20.38	101	116	R	EQIDETIEELQALRDR	T		1	1	ZP_00997792.1
F056010	O. batsensis HTCC2597	2141	614.655	2.99508	1840.94	1840.94	0.845762	31.32	84	98	K	IWIENADAQLDELRR	Q		1	2	ZP_00997792.1
F056010	O. batsensis HTCC2597	3128	561.292	3.99282	2241.14	2241.13	1.43142	30.73	99	116	R	QREQIDETIEELQALRDR	T		2	2	ZP_00997792.1
F056010	O. batsensis HTCC2597	3089	742.042	2.99593	2223.1	2223.1	0.63155	36.67	117	137	R	TAASSEAFRESKDAVADIVEK	-		2	2	ZP_00997792.1
F056010	O. batsensis HTCC2597	1320	787.889	1.99744	1573.76	1573.77	-1.73151	44.44	24	35	R	YYEYIELLSPER	E		0	2	ZP_00997792.1
F056010	O. batsensis HTCC2597	2361	958.975	1.9979	1915.94	1915.93	2.25165	31.52	24	38	R	YYEYIELLSPEREGR	S		1	3	ZP_00997792.1
F056010	O. batsensis HTCC2597	511	634.323	1.99682	1266.63	1266.63	0.337115	49.32	111	120	R	FLMNFLPEEK	R		0	2	ZP_00997796.1
F056010	O. batsensis HTCC2597	1716	847.977	1.99762	1693.94	1693.94	1.99771	45.63	81	97	R	AGNGLLDGVLELIPSAR	V		0	4	ZP_00997810.1
F056010	O. batsensis HTCC2597	1037	737.89	1.99727	1473.77	1473.76	0.867845	53.45	158	170	R	FLCLLAAPEGVER	M		0	2	ZP_00997810.1
F056010	O. batsensis HTCC2597	3219	1142.14	1.99824	2282.26	2282.26	1.71278	74.7	127	149	R	LVIAVDPMLATGNSSAAAIDLLK	N		0	2	ZP_00997810.1
F056010	O. batsensis HTCC2597	1902	438.99	3.99082	1751.93	1751.93	0.577077	20.44	2	16	M	TDHLTVVEHPLVQHK	L		0	2	ZP_00997810.1
F056010	O. batsensis HTCC2597	1583	827.921	1.99757	1653.83	1653.83	-0.0731636	24.07	56	71	R	TETPLGPMDAPVLEGK	K		0	1	ZP_00997810.1
F056010	O. batsensis HTCC2597	2968	718.701	2.9958	2153.08	2153.08	0.716184	17.45	109	126	K	TLQPVQYYFKVPDGLDDR	L		1	1	ZP_00997810.1
F056010	O. batsensis HTCC2597	541	428.231	2.99294	1281.67	1281.67	-0.441611	16.85	98	108	R	VGFVGLYRDEK	T		1	1	ZP_00997810.1
F056010	O. batsensis HTCC2597	3609	838.055	2.99639	2511.14	2511.14	1.0772	95.54	2	24	M	SDHVYPVTEIYGSSDTSVDDAVR	K		0	2	ZP_00997825.1
F056010	O. batsensis HTCC2597	3787	880.753	2.99657	2639.24	2639.24	1.23104	36.03	2	25	M	SDHVYPVTEIYGSSDTSVDDAVRK	A		1	4	ZP_00997825.1
F056010	O. batsensis HTCC2597	2939	710.334	2.99575	2127.98	2127.98	0.429516	52.88	5	24	R	CELTGKGPMTGNNVSHANNK	T		1	2	ZP_00997834.1
F056010	O. batsensis HTCC2597	179	524.27	1.99616	1046.53	1046.52	1.03199	27.93	74	83	K	DSELSANALK	V		0	1	ZP_00997834.1
F056010	O. batsensis HTCC2597	563	644.357	1.99687	1286.7	1286.7	1.69037	23.81	29	39	R	FLPNLNDVSLR	S		0	1	ZP_00997834.1
F056010	O. batsensis HTCC2597	1405	533.975	2.99434	1598.9	1598.9	0.93189	47.86	27	39	R	RRFLPNLNDVSLR	S		2	2	ZP_00997834.1
F056010	O. batsensis HTCC2597	1270	389.969	3.98967	1555.85	1555.85	-0.115693	15.88	58	71	R	TVDHRGGLDKFLAK	A		2	1	ZP_00997834.1
F056010	O. batsensis HTCC2597	915	711.832	1.99717	1421.65	1421.65	0.252524	48.96	123	134	K	DFNGCLVELEQV	-		0	2	ZP_00997844.1
F056010	O. batsensis HTCC2597	2729	680.029	2.99556	2037.07	2037.06	1.0093	34.4	5	23	R	LNHVAIAVPDLTAAADQYR	T		0	2	ZP_00997844.1
F056010	O. batsensis HTCC2597	3570	624.585	3.99355	2494.31	2494.31	-0.0545241	16.89	1	23	-	MIGRLNHVAIAVPDLTAAADQYR	T		1	1	ZP_00997844.1
F056010	O. batsensis HTCC2597	2809	1036.55	1.99806	2071.08	2071.08	1.09557	91.45	54	72	R	FVVIEQPAMQGLAELAEAR	G		0	4	ZP_00997847.1
F056010	O. batsensis HTCC2597	206	538.299	1.99626	1074.58	1074.58	1.16231	16.15	148	157	R	GFVEQGLGLR	S		0	1	ZP_00997847.1
F056010	O. batsensis HTCC2597	3351	783.444	2.99614	2347.31	2347.31	0.258168	18.99	22	42	K	LLTEPVPDRAQLEELLTIAAR	S		1	1	ZP_00997847.1
F056010	O. batsensis HTCC2597	1094	748.841	1.99731	1495.67	1495.67	-0.523512	23.6	123	137	K	GSEDVAAYLATVGDE	-		0	2	ZP_00997865.1
F056010	O. batsensis HTCC2597	1469	812.889	1.99752	1623.76	1623.76	0.283908	59.1	122	137	R	KGSEDVAAYLATVGDE	-		1	2	ZP_00997865.1
F056010	O. batsensis HTCC2597	1768	857.408	1.99765	1712.8	1712.8	0.496263	61.62	64	79	R	TAGTVEGFNYGDDLVR	A		0	2	ZP_00997865.1
F056010	O. batsensis HTCC2597	285	566.809	1.99645	1131.6	1131.6	-0.547895	50.77	53	63	K	TGPNLYGVVGR	T		0	1	ZP_00997865.1
F056010	O. batsensis HTCC2597	2333	636.648	2.99525	1906.92	1906.92	0.796048	50.68	46	61	R	EESIEEMHHADKLIAR	I		1	4	ZP_00997908.1
F056010	O. batsensis HTCC2597	2392	641.979	2.99529	1922.92	1922.92	0.415515	44.4	46	61	R	EESIEEMHHADKLIAR	I	Oxidation (M) [7]	1	2	ZP_00997908.1
F056010	O. batsensis HTCC2597	1309	785.872	1.99744	1569.73	1569.73	1.28175	61.83	85	98	K	ETLESDLAAEHEAR	T		0	4	ZP_00997908.1
F056010	O. batsensis HTCC2597	3099	1113.55	1.99819	2225.08	2225.08	1.04805	92.73	79	98	R	IGEDLKETLESDLAAEHEAR	T		1	10	ZP_00997908.1
F056010	O. batsensis HTCC2597	4149	768.893	3.99476	3071.54	3071.54	1.12321	17.36	79	105	R	IGEDLKETLESDLAAEHEARTLYIEAR	K		2	1	ZP_00997908.1
F056010	O. batsensis HTCC2597	718	668.891	1.99699	1335.77	1335.77	0.413246	45.65	62	73	R	IIFLGGHPNLQK	L		0	2	ZP_00997908.1
F056010	O. batsensis HTCC2597	2410	644.38	2.99531	1930.12	1930.12	0.900464	26	62	78	R	IIFLGGHPNLQKLDPLR	I		1	2	ZP_00997908.1
F056010	O. batsensis HTCC2597	3959	705.865	3.99429	2819.43	2819.43	0.440515	30.7	74	98	K	LDPLRIGEDLKETLESDLAAEHEAR	T		2	2	ZP_00997908.1
F056010	O. batsensis HTCC2597	2183	930.48	1.99783	1858.94	1858.94	1.07803	51.78	144	161	K	LGAEKYGQLQAKPADAAE	-		1	6	ZP_00997908.1
F056010	O. batsensis HTCC2597	1188	766.362	1.99737	1530.71	1530.71	0.098647	66.33	31	43	R	LQEDWGYGHIADK	S		0	5	ZP_00997908.1
F056010	O. batsensis HTCC2597	1900	876.94	1.9977	1751.87	1751.86	1.68392	38.79	17	30	R	SELTAVSQYWLHYR	L		0	3	ZP_00997908.1
F056010	O. batsensis HTCC2597	2965	717.692	2.99579	2150.06	2150.05	0.597659	40.27	44	61	K	SREESIEEMHHADKLIAR	I		2	10	ZP_00997908.1
F056010	O. batsensis HTCC2597	3007	723.024	2.99582	2166.05	2166.05	0.953811	50.61	44	61	K	SREESIEEMHHADKLIAR	I	Oxidation (M) [9]	2	4	ZP_00997908.1
F056010	O. batsensis HTCC2597	26	433.242	1.99535	864.47	864.47	-0.742651	26.58	99	105	R	TLYIEAR	K		0	4	ZP_00997908.1
F056010	O. batsensis HTCC2597	385	602.838	1.99666	1203.66	1203.66	0.415399	54.38	7	16	K	VIQYLNDALR	S		0	2	ZP_00997908.1
F056010	O. batsensis HTCC2597	768	681.338	1.99704	1360.66	1360.66	-0.304264	63.12	149	161	K	YGQLQAKPADAAE	-		0	2	ZP_00997908.1
F056010	O. batsensis HTCC2597	2479	653.001	2.99537	1955.98	1955.98	1.06954	58.62	28	46	R	GEGREDGVDEAEVLAILGK	M		1	2	ZP_00997930.1
F056010	O. batsensis HTCC2597	1311	786.864	1.99744	1571.71	1571.71	0.89393	52.2	120	134	R	YTGQMDFGAAGPMVK	A		0	2	ZP_00997930.1
F056010	O. batsensis HTCC2597	892	706.357	1.99715	1410.7	1410.7	2.61148	29.65	89	101	R	AIYGFNQQVMGAL	-		0	2	ZP_00997957.1
F056010	O. batsensis HTCC2597	2578	663.698	2.99545	1988.07	1988.07	1.11213	35.82	30	48	K	LNHPEAIALITDAVVEGAR	D		0	2	ZP_00997959.1
F056010	O. batsensis HTCC2597	1759	854.454	1.99764	1706.89	1706.89	0.909255	79.76	93	108	R	ALSGVDSLYSIVQMPK	G		0	3	ZP_00997991.1
F056010	O. batsensis HTCC2597	1782	860.942	1.99766	1719.87	1719.87	1.02275	61.45	21	36	K	EAATILDELGVAYEAR	I		0	2	ZP_00997991.1
F056010	O. batsensis HTCC2597	2798	1035.99	1.99806	2069.96	2069.95	1.59472	26.86	144	162	R	LDAWREALSASIPDEPADD	-		1	2	ZP_00997991.1
F056010	O. batsensis HTCC2597	335	582.859	1.99654	1163.7	1163.7	0.842999	27.24	82	92	R	VPVIGVPVQTR	A		0	2	ZP_00997991.1
F056010	O. batsensis HTCC2597	2954	715.701	2.99578	2144.08	2144.08	-0.68281	32.4	196	215	K	TFPALEQSAQEMIDALPGVK	V		0	3	ZP_00998003.1
F056010	O. batsensis HTCC2597	749	676.906	1.99702	1351.8	1351.8	1.19397	49.22	216	227	K	VIEPEVLKAIEI	-		1	2	ZP_00998003.1
F056010	O. batsensis HTCC2597	426	611.33	1.9967	1220.65	1220.64	0.747966	21.76	85	95	R	EGFFAVPKVVE	-		1	1	ZP_00998005.1
F056010	O. batsensis HTCC2597	1343	527.65	2.99427	1579.93	1579.93	-0.618382	20.01	19	34	K	GVNVLADAVKVTLGPK	G		1	2	ZP_00998041.1
F056010	O. batsensis HTCC2597	3631	841.088	2.99641	2520.24	2520.24	1.87482	15.84	81	105	R	TNDEAGDGTTTATVLAQAIVKEGMK	A		1	2	ZP_00998041.1
F056010	O. batsensis HTCC2597	921	711.933	1.99717	1421.85	1421.85	0.952983	23.46	2	13	M	AFKPLHDRVLVK	R		1	4	ZP_00998042.1
F056010	O. batsensis HTCC2597	419	609.806	1.9967	1217.6	1217.6	1.057	64.69	50	60	K	DNGELIEMAVK	A		0	2	ZP_00998042.1
F056010	O. batsensis HTCC2597	1399	799.413	1.99748	1596.81	1596.81	0.449646	89.13	33	48	K	EKPAEGEVVAVGEGAR	K		0	4	ZP_00998042.1
F056010	O. batsensis HTCC2597	1804	575.976	2.99475	1724.91	1724.91	0.282334	46.32	33	49	K	EKPAEGEVVAVGEGARK	D		1	4	ZP_00998042.1
F056010	O. batsensis HTCC2597	1034	737.394	1.99727	1472.77	1472.77	0.428444	88.57	87	101	K	ESDILGIITDGAAAK	A		0	4	ZP_00998042.1
F056010	O. batsensis HTCC2597	1447	808.432	1.99751	1614.85	1614.85	1.74134	59.58	87	103	K	ESDILGIITDGAAAKAA	-		1	3	ZP_00998042.1
F056010	O. batsensis HTCC2597	733	673.854	1.99701	1345.69	1345.69	1.43569	76.13	49	60	R	KDNGELIEMAVK	A		1	4	ZP_00998042.1
F056010	O. batsensis HTCC2597	2623	1000.54	1.99799	1999.06	1999.06	1.45068	89.43	14	32	K	RVESEEKTAGGLIIPDSAK	E		2	6	ZP_00998042.1
F056010	O. batsensis HTCC2597	298	571.825	1.99648	1141.64	1141.63	1.20091	50.2	21	32	K	TAGGLIIPDSAK	E		0	2	ZP_00998042.1
F056010	O. batsensis HTCC2597	3897	907.82	2.99667	2720.44	2720.43	1.14835	46.41	21	48	K	TAGGLIIPDSAKEKPAEGEVVAVGEGAR	K		1	4	ZP_00998042.1
F056010	O. batsensis HTCC2597	2151	615.327	2.99509	1842.96	1842.96	1.10095	37.77	15	32	R	VESEEKTAGGLIIPDSAK	E		1	2	ZP_00998042.1
F056010	O. batsensis HTCC2597	4312	856.448	3.9953	3421.76	3421.76	1.07606	24.9	15	48	R	VESEEKTAGGLIIPDSAKEKPAEGEVVAVGEGAR	K		2	1	ZP_00998042.1
F056010	O. batsensis HTCC2597	2307	630.631	2.99521	1888.87	1888.87	-0.56224	31.09	119	134	R	ACWAEERDVADEAVIR	S		1	2	ZP_00998053.1
F056010	O. batsensis HTCC2597	1553	549.275	2.9945	1644.8	1644.8	-0.0863325	32.7	31	44	K	HGATITYKPCDINR	V		0	2	ZP_00998053.1
F056010	O. batsensis HTCC2597	1223	771.936	1.99739	1541.86	1541.86	0.830817	79.87	45	59	R	VFASTGGLPLAERPK	A		0	4	ZP_00998053.1
F056010	O. batsensis HTCC2597	454	619.823	1.99675	1237.63	1237.63	0.32239	28.77	144	155	R	TEPAPAATPEVR	G		0	2	ZP_00998057.1
F056010	O. batsensis HTCC2597	2132	613.966	2.99508	1838.88	1838.88	-0.316498	28.33	108	123	R	EIQGRAEQDDTPPEVR	A		1	2	ZP_00998060.1
F056010	O. batsensis HTCC2597	393	603.312	1.99666	1204.61	1204.61	-0.263156	32.02	98	107	R	EYEPTLNALR	E		0	2	ZP_00998060.1
F056010	O. batsensis HTCC2597	304	383.2	2.99211	1146.58	1146.58	0.551205	16.11	100	109	R	AYLDRADARP	-		1	1	ZP_00998066.1
F056010	O. batsensis HTCC2597	3560	831.072	2.99636	2490.19	2490.19	1.38022	36.75	67	89	R	EAELTNQLSQTEAELSAAMEGLR	E		0	2	ZP_00998066.1
F056010	O. batsensis HTCC2597	2484	979.497	1.99794	1956.98	1956.98	0.503327	67.94	53	70	R	VALDQELAEFDAPLDGVR	E		0	2	ZP_00998068.1
F056010	O. batsensis HTCC2597	210	539.288	1.99626	1076.56	1076.56	0.186706	20.06	4	12	R	TYQPSNLVR	K		0	2	ZP_00998080.1
F056010	O. batsensis HTCC2597	2033	900.483	1.99776	1798.95	1798.95	1.19959	38.73	25	40	K	TLEIVPDVILCSDAVR	T		0	1	ZP_00998091.1
F056010	O. batsensis HTCC2597	1774	858.447	1.99765	1714.88	1714.88	0.624534	44.41	134	149	R	VVNFITPGELTGPEKD	-		1	2	ZP_00998091.1
F056010	O. batsensis HTCC2597	3999	718.902	3.9944	2871.58	2871.57	0.804785	17.88	204	229	R	ATFETPTDHVILPEIISKEPLGPLVR	H		1	1	ZP_00998096.1
F056010	O. batsensis HTCC2597	2763	1029.05	1.99804	2056.09	2056.08	1.63272	73.42	64	84	R	AVATAVLGDPNAVEFVPTTGK	T		0	2	ZP_00998096.1
F056010	O. batsensis HTCC2597	3277	772.085	2.99609	2313.23	2313.23	0.255919	33.43	64	86	R	AVATAVLGDPNAVEFVPTTGKTR	F		1	2	ZP_00998096.1
F056010	O. batsensis HTCC2597	2530	988.505	1.99796	1975	1975	0.331646	59.05	322	339	R	GLNAQWTDGGLLYAPPFR	-		0	2	ZP_00998096.1
F056010	O. batsensis HTCC2597	3012	725.024	2.99583	2172.05	2172.05	-0.0087475	42.3	100	118	K	AGFRYGDMAPMAIIEFVER	D		1	2	ZP_00998103.1
F056010	O. batsensis HTCC2597	3042	730.358	2.99586	2188.05	2188.04	2.95332	15.36	100	118	K	AGFRYGDMAPMAIIEFVER	D	Oxidation (M) [8]	1	1	ZP_00998103.1
F056010	O. batsensis HTCC2597	2825	693.352	2.99564	2077.03	2077.03	-0.295132	55.72	18	35	R	KAMFTNMSASLIEHEQIK	T		1	2	ZP_00998103.1
F056010	O. batsensis HTCC2597	64	465.774	1.99567	929.533	929.533	0.00107581	32.95	79	86	K	LFEVLGPR	Y		0	2	ZP_00998103.1
F056010	O. batsensis HTCC2597	2475	652.702	2.99537	1955.09	1955.08	0.855206	26.09	70	86	R	VQQDEAVKKLFEVLGPR	Y		2	3	ZP_00998103.1
F056010	O. batsensis HTCC2597	1858	871.419	1.99769	1740.82	1740.82	0.781815	53.95	104	118	R	YGDMAPMAIIEFVER	D		0	4	ZP_00998103.1
F056010	O. batsensis HTCC2597	1910	879.416	1.99771	1756.82	1756.82	0.593118	42.63	104	118	R	YGDMAPMAIIEFVER	D	Oxidation (M) [4]	0	3	ZP_00998103.1
F056010	O. batsensis HTCC2597	1639	833.897	1.99758	1665.78	1665.78	1.09138	99.98	57	72	R	KSTPYAAQMAAEDAGR	K		1	4	ZP_00998105.1
F056010	O. batsensis HTCC2597	2024	598.965	2.99495	1793.87	1793.87	-0.230786	40.17	57	73	R	KSTPYAAQMAAEDAGRK	A		2	2	ZP_00998105.1
F056010	O. batsensis HTCC2597	1678	561.598	2.99462	1681.77	1681.77	0.0731371	62.39	57	72	R	KSTPYAAQMAAEDAGR	K	Oxidation (M) [9]	1	2	ZP_00998105.1
F056010	O. batsensis HTCC2597	1874	872.443	1.99769	1742.87	1742.87	0.727536	97.33	15	31	K	NIAAGVAHVNSSFNNTK	I		0	3	ZP_00998105.1
F056010	O. batsensis HTCC2597	1217	769.849	1.99738	1537.68	1537.68	0.762836	98.81	58	72	K	STPYAAQMAAEDAGR	K		0	2	ZP_00998105.1
F056010	O. batsensis HTCC2597	1262	777.847	1.99741	1553.68	1553.68	0.549663	70.5	58	72	K	STPYAAQMAAEDAGR	K	Oxidation (M) [8]	0	2	ZP_00998105.1
F056010	O. batsensis HTCC2597	684	664.845	1.99697	1327.67	1327.67	0.937731	78.32	81	93	K	TLEVEVQGPGSGR	E		0	2	ZP_00998105.1
F056010	O. batsensis HTCC2597	2283	628.998	2.9952	1883.97	1883.97	0.785044	51.71	81	98	K	TLEVEVQGPGSGRESALR	A		1	2	ZP_00998105.1
F056010	O. batsensis HTCC2597	399	404.247	2.99252	1209.72	1209.72	-0.130609	29.5	2	13	M	ARIAGVNIPTAK	R		1	4	ZP_00998106.1
F056010	O. batsensis HTCC2597	2001	596.628	2.99494	1786.86	1786.86	0.990565	37.23	58	72	R	EHIDANYTVEGDLRR	E		1	2	ZP_00998106.1
F056010	O. batsensis HTCC2597	116	492.298	1.99591	982.581	982.581	0.13434	41.15	4	13	R	IAGVNIPTAK	R		0	2	ZP_00998106.1
F056010	O. batsensis HTCC2597	150	514.239	1.99608	1026.46	1026.46	0.765737	31.82	81	88	R	LMDLGCYR	G		0	2	ZP_00998106.1
F056010	O. batsensis HTCC2597	1443	538.965	2.99439	1613.87	1613.87	0.257145	58.55	44	57	R	RVNELSDAEVLTIR	E		1	2	ZP_00998106.1
F056010	O. batsensis HTCC2597	4194	1059.22	2.99715	3174.64	3174.63	1.21715	79.15	14	43	K	RVPIALTYITGIGPSSAQSICEATGIDQTR	R		1	6	ZP_00998106.1
F056010	O. batsensis HTCC2597	4250	833.692	3.99517	3330.74	3330.74	0.445247	44.97	14	44	K	RVPIALTYITGIGPSSAQSICEATGIDQTRR	V		2	3	ZP_00998106.1
F056010	O. batsensis HTCC2597	4099	1007.18	2.997	3018.53	3018.53	-0.0102699	31.11	15	43	R	VPIALTYITGIGPSSAQSICEATGIDQTR	R		0	2	ZP_00998106.1
F056010	O. batsensis HTCC2597	957	718.349	1.9972	1434.68	1434.68	1.48326	69.48	108	121	R	QPYVGTDMATGAPK	R		0	2	ZP_00998107.1
F056010	O. batsensis HTCC2597	2801	1036.06	1.99806	2070.1	2070.1	0.865177	59.42	135	156	K	AAIDAVEKAGGSLKVTAAQAAE	-		2	3	ZP_00998111.1
F056010	O. batsensis HTCC2597	524	637.341	1.99684	1272.67	1272.67	0.227868	70.92	143	156	K	AGGSLKVTAAQAAE	-		1	2	ZP_00998111.1
F056010	O. batsensis HTCC2597	569	644.387	1.99687	1286.76	1286.76	0.195841	67.94	72	83	K	EFAVINLGIIAK	F		0	2	ZP_00998111.1
F056010	O. batsensis HTCC2597	3548	826.435	2.99634	2476.28	2476.28	0.427254	40.65	84	107	K	FIEAGKLDAGNITEETLVSSGAVR	R		1	2	ZP_00998111.1
F056010	O. batsensis HTCC2597	3779	659.103	3.99389	2632.38	2632.38	0.637066	33.86	84	108	K	FIEAGKLDAGNITEETLVSSGAVRR	K		2	1	ZP_00998111.1
F056010	O. batsensis HTCC2597	2423	970.472	1.99792	1938.93	1938.93	1.5818	67.81	42	59	R	SGVAINGYEGGQMPLYQR	L		0	1	ZP_00998111.1
F056010	O. batsensis HTCC2597	178	523.261	1.99615	1044.51	1044.51	-0.665385	30.02	36	44	R	ELEDTPSVR	G		0	2	ZP_00998115.1
F056010	O. batsensis HTCC2597	2379	640.693	2.99528	1919.06	1919.05	0.674811	50.35	45	61	R	GMINKIPHLVEIVEEKA	-		2	5	ZP_00998115.1
F056010	O. batsensis HTCC2597	2421	646.024	2.99532	1935.05	1935.05	0.917806	32.09	45	61	R	GMINKIPHLVEIVEEKA	-	Oxidation (M) [2]	2	2	ZP_00998115.1
F056010	O. batsensis HTCC2597	59	464.795	1.99567	927.576	927.575	0.804247	37.82	22	30	K	TLIGLGLNK	M		0	2	ZP_00998115.1
F056010	O. batsensis HTCC2597	1165	760.414	1.99735	1518.81	1518.81	1.34842	81.99	121	134	R	AVFEMLGIQDVVAK	S		0	2	ZP_00998116.1
F056010	O. batsensis HTCC2597	1411	802.856	1.99749	1603.7	1603.7	0.81811	85.42	176	190	K	RDEAPAESSQVSEEA	-		1	2	ZP_00998116.1
F056010	O. batsensis HTCC2597	775	683.333	1.99705	1364.65	1364.65	0.427216	40.42	135	146	K	SVGSQNPYNMIR	A		0	2	ZP_00998116.1
F056010	O. batsensis HTCC2597	822	691.331	1.99709	1380.65	1380.65	0.770654	52.5	135	146	K	SVGSQNPYNMIR	A	Oxidation (M) [10]	0	2	ZP_00998116.1
F056010	O. batsensis HTCC2597	855	700.372	1.99712	1398.73	1398.73	0.504029	62.97	106	120	R	TAPTGTGIIAGGPMR	A		0	2	ZP_00998116.1
F056010	O. batsensis HTCC2597	3331	781.056	2.99613	2340.15	2340.14	0.733715	19.51	169	190	K	VADILPKRDEAPAESSQVSEEA	-		2	1	ZP_00998116.1
F056010	O. batsensis HTCC2597	551	642.868	1.99687	1283.72	1283.72	0.72991	35.86	94	106	K	ALADAAREGGLKI	-		2	4	ZP_00998117.1
F056010	O. batsensis HTCC2597	1126	757.894	1.99734	1513.77	1513.77	0.140047	72.61	48	62	K	DLGVVGQNNVEAATK	V		0	2	ZP_00998117.1
F056010	O. batsensis HTCC2597	2935	532.771	3.99244	2127.05	2127.05	0.152323	16.01	73	91	K	KAGVEEAYFDRGGFLFHGK	V		2	1	ZP_00998117.1
F056010	O. batsensis HTCC2597	3854	896.776	2.99663	2687.31	2687.3	0.624418	22.29	31	55	K	GTHSFTATDDVTIVQEDNAITVTPR	G		0	2	ZP_00998118.1
F056010	O. batsensis HTCC2597	3891	680.895	3.99408	2719.55	2719.55	0.628781	29.52	4	30	R	IGKKPVELPSGVTATISGQTVEVKGPK	G		2	1	ZP_00998118.1
F056010	O. batsensis HTCC2597	3611	838.436	2.9964	2512.29	2512.28	0.357842	21.95	105	127	K	LNLGYSHDVDFPIPEGVTITTPK	Q		0	1	ZP_00998118.1
F056010	O. batsensis HTCC2597	1454	810.426	1.99751	1618.84	1618.84	0.835786	87.87	32	45	R	AWVLDVLADEGYIR	G		0	3	ZP_00998119.1
F056010	O. batsensis HTCC2597	2861	699.694	2.99568	2096.06	2096.06	1.11686	29.11	32	49	R	AWVLDVLADEGYIRGYEK	G		1	2	ZP_00998119.1
F056010	O. batsensis HTCC2597	1249	776.902	1.99741	1551.79	1551.79	0.368607	36.02	50	64	K	GTDANGHPTLEISLK	Y		0	2	ZP_00998119.1
F056010	O. batsensis HTCC2597	500	631.798	1.99681	1261.58	1261.58	0.764914	68.63	1	11	-	MNDPIGDMLTR	I		0	2	ZP_00998119.1
F056010	O. batsensis HTCC2597	1195	511.262	2.99409	1530.76	1530.76	-0.310956	32.22	1	13	-	MNDPIGDMLTRIR	N		1	2	ZP_00998119.1
F056010	O. batsensis HTCC2597	537	639.795	1.99685	1277.58	1277.57	0.818739	60.27	1	11	-	MNDPIGDMLTR	I	Oxidation (M) [1]	0	2	ZP_00998119.1
F056010	O. batsensis HTCC2597	587	647.792	1.99689	1293.57	1293.57	0.716622	49.49	1	11	-	MNDPIGDMLTR	I	Oxidation (M) [1], Oxidation (M) [8]	0	2	ZP_00998119.1
F056010	O. batsensis HTCC2597	354	588.335	1.99658	1174.66	1174.66	0.0732129	62.99	97	108	R	QGLGVSIVSTSK	G		0	2	ZP_00998119.1
F056010	O. batsensis HTCC2597	2722	678.693	2.99555	2033.06	2033.06	0.408744	65.78	97	117	R	QGLGVSIVSTSKGVMSDAAAR	S		1	2	ZP_00998119.1
F056010	O. batsensis HTCC2597	2745	684.025	2.99558	2049.05	2049.05	-0.0917497	47.06	97	117	R	QGLGVSIVSTSKGVMSDAAAR	S	Oxidation (M) [15]	1	2	ZP_00998119.1
F056010	O. batsensis HTCC2597	1413	535.616	2.99436	1603.83	1603.83	-0.00935264	19.73	84	96	R	RVYMGRDDIPQVR	Q		2	2	ZP_00998119.1
F056010	O. batsensis HTCC2597	1461	540.948	2.99441	1619.82	1619.82	0.472892	19.2	84	96	R	RVYMGRDDIPQVR	Q	Oxidation (M) [4]	2	1	ZP_00998119.1
F056010	O. batsensis HTCC2597	328	579.846	1.99653	1157.68	1157.68	0.383527	27.51	21	31	K	SIVSTPASKLR	A		1	3	ZP_00998119.1
F056010	O. batsensis HTCC2597	886	705.341	1.99714	1408.67	1408.67	0.960483	58.65	118	130	R	SQNVGGEVLCTVF	-		0	3	ZP_00998119.1
F056010	O. batsensis HTCC2597	980	483.582	2.99375	1447.72	1447.72	0.407536	24.01	85	96	R	VYMGRDDIPQVR	Q		1	2	ZP_00998119.1
F056010	O. batsensis HTCC2597	1011	488.914	2.99382	1463.72	1463.72	0.52674	15.8	85	96	R	VYMGRDDIPQVR	Q	Oxidation (M) [3]	1	1	ZP_00998119.1
F056010	O. batsensis HTCC2597	241	549.285	1.99633	1096.56	1096.56	1.04874	29.01	65	73	K	YYEGTPVIR	E		0	2	ZP_00998119.1
F056010	O. batsensis HTCC2597	2690	674.68	2.99552	2021.02	2021.01	1.68331	36.93	20	36	R	AALKEIIYDESKPMEER	F		1	4	ZP_00998120.1
F056010	O. batsensis HTCC2597	3290	582.053	3.99308	2324.18	2324.18	-0.386803	56.61	20	38	R	AALKEIIYDESKPMEERFR	A		2	2	ZP_00998120.1
F056010	O. batsensis HTCC2597	2726	680.012	2.99556	2037.01	2037.01	2.6426	51.71	20	36	R	AALKEIIYDESKPMEER	F	Oxidation (M) [14]	1	2	ZP_00998120.1
F056010	O. batsensis HTCC2597	1521	546.928	2.99447	1637.76	1637.76	0.7553	25.21	24	36	K	EIIYDESKPMEER	F		0	2	ZP_00998120.1
F056010	O. batsensis HTCC2597	1582	552.259	2.99453	1653.76	1653.76	-0.0495841	26.9	24	36	K	EIIYDESKPMEER	F	Oxidation (M) [10]	0	2	ZP_00998120.1
F056010	O. batsensis HTCC2597	597	649.359	1.9969	1296.7	1296.7	0.217474	61.93	81	93	R	ELGSNGQVPGLVK	S		0	2	ZP_00998120.1
F056010	O. batsensis HTCC2597	2049	604.346	2.995	1810.01	1810.01	0.661874	25.07	77	93	R	IMLRELGSNGQVPGLVK	S		1	1	ZP_00998120.1
F056010	O. batsensis HTCC2597	2580	663.968	2.99545	1988.88	1988.88	1.09459	25.86	21	37	R	AAMKEEFGYSNDMMIPR	L		1	2	ZP_00998121.1
F056010	O. batsensis HTCC2597	123	497.216	1.99595	992.418	992.417	0.214627	21.39	180	187	K	HFNMPFNS	-		0	1	ZP_00998121.1
F056010	O. batsensis HTCC2597	2707	677.369	2.99554	2029.09	2029.09	-0.680601	36.61	38	56	R	LDKIVLNIGCGAEAVKDSK	K		2	3	ZP_00998121.1
F056010	O. batsensis HTCC2597	162	519.266	1.99612	1036.52	1036.52	-0.456335	53.49	2	10	M	LDTATYTPR	L		0	2	ZP_00998121.1
F056010	O. batsensis HTCC2597	2209	623.664	2.99515	1867.97	1867.97	0.889201	22.68	104	118	R	MYEFLDRLITIAMPR	I		1	2	ZP_00998121.1
F056010	O. batsensis HTCC2597	2322	634.325	2.99524	1899.95	1899.96	-2.7248	24.62	104	118	R	MYEFLDRLITIAMPR	I	Oxidation (M) [1], Oxidation (M) [13]	1	1	ZP_00998121.1
F056010	O. batsensis HTCC2597	2280	628.995	2.9952	1883.96	1883.96	0.50001	32.76	104	118	R	MYEFLDRLITIAMPR	I	Oxidation (M) [13]	1	2	ZP_00998121.1
F056010	O. batsensis HTCC2597	703	666.344	1.99698	1330.67	1330.67	0.459918	87.57	60	72	K	SAQEDLTAIAGQK	A		0	4	ZP_00998121.1
F056010	O. batsensis HTCC2597	2895	1056.58	1.99809	2111.14	2111.14	-0.0161051	76.93	61	80	K	ALPIDISNLAFVDANGKPTR	V		0	2	ZP_00998122.1
F056010	O. batsensis HTCC2597	258	556.825	1.99638	1111.64	1111.63	0.435395	55.79	35	45	K	AVVDGINVAVR	H		0	2	ZP_00998122.1
F056010	O. batsensis HTCC2597	292	569.293	1.99646	1136.57	1136.57	0.0730267	31.81	93	103	R	FAKTTGDVIDA	-		1	2	ZP_00998122.1
F056010	O. batsensis HTCC2597	2165	617.355	2.99511	1849.04	1849.04	0.871803	44.81	28	45	R	VLPQDGKAVVDGINVAVR	H		1	2	ZP_00998122.1
F056010	O. batsensis HTCC2597	12	394.244	1.99489	786.474	786.475	-1.23589	23.7	98	104	R	IFGPVVR	E		0	2	ZP_00998123.1
F056010	O. batsensis HTCC2597	81	477.797	1.99578	953.58	953.58	0.352356	46.63	114	122	K	IISLAPEVL	-		0	2	ZP_00998123.1
F056010	O. batsensis HTCC2597	2189	932.439	1.99784	1862.86	1862.86	0.849768	104.05	1	17	-	MIQMQTNLDVADNSGAR	R		0	3	ZP_00998123.1
F056010	O. batsensis HTCC2597	2263	940.433	1.99786	1878.85	1878.86	-2.94647	88.55	1	17	-	MIQMQTNLDVADNSGAR	R	Oxidation (M) [4]	0	1	ZP_00998123.1
F056010	O. batsensis HTCC2597	1393	798.429	1.99748	1594.84	1594.84	0.596297	70.31	82	97	R	NAAVILNNAGEPVGTR	I		0	2	ZP_00998123.1
F056010	O. batsensis HTCC2597	1039	737.921	1.99727	1473.83	1473.83	0.377249	15.71	110	122	K	NFMKIISLAPEVL	-		1	1	ZP_00998123.1
F056010	O. batsensis HTCC2597	742	675.388	1.99702	1348.76	1348.76	0.611673	81.52	32	44	R	YASVGDIIVVSVK	E		0	2	ZP_00998123.1
F056010	O. batsensis HTCC2597	2356	958.547	1.9979	1915.08	1915.08	0.416693	102.94	32	49	R	YASVGDIIVVSVKEAIPR	G		1	4	ZP_00998123.1
F056010	O. batsensis HTCC2597	1598	552.954	2.99454	1655.84	1655.84	0.797179	21.8	44	58	R	AHDADNAFKKGDIVR	I		2	4	ZP_00998124.1
F056010	O. batsensis HTCC2597	2102	916.972	1.9978	1831.93	1831.93	0.682887	107.45	8	25	R	GVVTSDANAQTVTVSVER	R		0	2	ZP_00998124.1
F056010	O. batsensis HTCC2597	2575	995.022	1.99798	1988.03	1988.03	0.677053	32.19	8	26	R	GVVTSDANAQTVTVSVERR	F		1	3	ZP_00998124.1
F056010	O. batsensis HTCC2597	1004	730.368	1.99724	1458.72	1458.72	0.357162	70.96	30	42	R	FQQATGQLENPAR	M		0	2	ZP_00998125.1
F056010	O. batsensis HTCC2597	905	708.391	1.99716	1414.77	1414.77	0.794477	73.28	53	66	R	VLTVLNEKAASAAE	-		1	2	ZP_00998125.1
F056010	O. batsensis HTCC2597	1990	595.634	2.99493	1783.88	1783.88	0.675495	23.52	99	113	R	LAEGKPLDPESYYFR	T		0	1	ZP_00998126.1
F056010	O. batsensis HTCC2597	3164	755.075	2.996	2262.2	2262.2	1.44373	37.91	57	76	R	APVELFHEALDNIKPSVEVR	S		0	3	ZP_00998130.1
F056010	O. batsensis HTCC2597	640	437.558	2.99309	1309.65	1309.65	-0.2787	41.81	26	36	K	FMNNLMIDGKK	S		1	2	ZP_00998130.1
F056010	O. batsensis HTCC2597	869	702.896	1.99713	1403.78	1403.78	0.44594	58.14	42	53	K	IVYNALDRIEAK	V		1	4	ZP_00998130.1
F056010	O. batsensis HTCC2597	490	629.344	1.9968	1256.67	1256.67	1.12042	88.85	120	131	R	LAGELLDAVNSR	G		0	4	ZP_00998130.1
F056010	O. batsensis HTCC2597	1730	850.472	1.99763	1698.93	1698.93	1.42796	59.49	120	136	R	LAGELLDAVNSRGSAVK	K		1	4	ZP_00998130.1
F056010	O. batsensis HTCC2597	3456	807.108	2.99626	2418.3	2418.3	0.10834	43.17	56	76	K	RAPVELFHEALDNIKPSVEVR	S		1	4	ZP_00998130.1
F056010	O. batsensis HTCC2597	2781	518.04	3.99222	2068.13	2068.13	0.144092	18.85	79	96	R	RVGGATYQVPVEVRPERR	E		2	1	ZP_00998130.1
F056010	O. batsensis HTCC2597	2370	640.358	2.99528	1918.05	1918.05	-0.0782043	30.18	37	53	K	SVAEKIVYNALDRIEAK	V		2	2	ZP_00998130.1
F056010	O. batsensis HTCC2597	2349	638.351	2.99527	1912.03	1912.03	1.08733	36.78	80	96	R	VGGATYQVPVEVRPERR	E		1	2	ZP_00998130.1
F056010	O. batsensis HTCC2597	3803	530.1	4.9905	2645.46	2645.47	-0.629757	34.16	54	76	K	VKRAPVELFHEALDNIKPSVEVR	S		2	3	ZP_00998130.1
F056010	O. batsensis HTCC2597	23	423.745	1.99525	845.476	845.476	0.622135	32.27	103	109	R	WLITASR	S		0	2	ZP_00998130.1
F056010	O. batsensis HTCC2597	89	484.798	1.99584	967.582	967.581	0.410301	67.65	2	9	M	PTIQQLIR	K		0	2	ZP_00998132.1
F056010	O. batsensis HTCC2597	3475	808.804	2.99626	2423.39	2423.39	0.142775	54.67	2	23	M	ADLKKLAEEIVGLTLLEAQELK	T		2	3	ZP_00998138.1
F056010	O. batsensis HTCC2597	932	476.94	2.99366	1427.8	1427.8	0.292058	18.81	89	102	K	EAKELVEAGGKAVK	E		2	1	ZP_00998138.1
F056010	O. batsensis HTCC2597	9	379.742	1.99469	757.469	757.47	-0.448863	21.39	81	88	R	GITGLGLK	E		0	2	ZP_00998138.1
F056010	O. batsensis HTCC2597	224	543.83	1.9963	1085.65	1085.64	0.560036	47.05	81	91	R	GITGLGLKEAK	E		1	2	ZP_00998138.1
F056010	O. batsensis HTCC2597	2226	935.536	1.99785	1869.06	1869.06	-0.133757	89.55	81	99	R	GITGLGLKEAKELVEAGGK	A		2	6	ZP_00998138.1
F056010	O. batsensis HTCC2597	93	485.806	1.99585	969.597	969.597	0.160892	53.35	73	80	K	INVIKEVR	G		1	4	ZP_00998138.1
F056010	O. batsensis HTCC2597	2601	999.081	1.99798	1996.15	1996.15	1.04902	94.47	6	23	K	KLAEEIVGLTLLEAQELK	T		1	8	ZP_00998138.1
F056010	O. batsensis HTCC2597	2219	935.034	1.99785	1868.05	1868.05	1.31153	83.65	7	23	K	LAEEIVGLTLLEAQELK	T		0	8	ZP_00998138.1
F056010	O. batsensis HTCC2597	300	572.317	1.99648	1142.62	1142.62	0.168035	40.06	117	127	K	LEAAGAEIELK	-		0	2	ZP_00998138.1
F056010	O. batsensis HTCC2597	1027	736.433	1.99726	1470.85	1470.85	0.174729	80.41	67	80	K	SAGASKINVIKEVR	G		2	6	ZP_00998138.1
F056010	O. batsensis HTCC2597	4465	1070.53	3.99624	4278.07	4278.07	-0.0633463	24.63	24	66	K	TILKDEYGIEPAAGGAVMMAGPAGGGDAGAAEEEKTEFDVILK	S		2	1	ZP_00998138.1
F056010	O. batsensis HTCC2597	4468	1074.53	3.99625	4294.07	4294.07	2.05167	51.32	24	66	K	TILKDEYGIEPAAGGAVMMAGPAGGGDAGAAEEEKTEFDVILK	S	Oxidation (M) [19]	2	1	ZP_00998138.1
F056010	O. batsensis HTCC2597	4230	1103.23	2.99726	3306.67	3306.67	0.440927	42.23	52	83	K	IALDGKPCESIGSLLTGMTVLTYSEDPVAAAK	V		0	4	ZP_00998139.1
F056010	O. batsensis HTCC2597	4241	1108.57	2.99727	3322.67	3322.67	1.66703	55	52	83	K	IALDGKPCESIGSLLTGMTVLTYSEDPVAAAK	V	Oxidation (M) [18]	0	2	ZP_00998139.1
F056010	O. batsensis HTCC2597	1832	579.626	2.99479	1735.86	1735.86	0.621595	35.14	94	109	K	KFEILGGSMGENALDR	A		1	2	ZP_00998139.1
F056010	O. batsensis HTCC2597	2568	994	1.99797	1985.99	1985.98	1.1274	73.13	116	134	K	DLNANDVEGAMQIILGSAR	S		0	4	ZP_00998141.1
F056010	O. batsensis HTCC2597	2753	1027.56	1.99804	2053.11	2053.11	0.280063	62.66	11	31	K	LQVPAGQANPSPPVGPALGQR	G		0	4	ZP_00998141.1
F056010	O. batsensis HTCC2597	3137	1123.57	1.99821	2245.13	2245.12	2.67335	91.04	114	134	K	MKDLNANDVEGAMQIILGSAR	S		1	4	ZP_00998141.1
F056010	O. batsensis HTCC2597	3155	754.714	2.996	2261.12	2261.11	2.96624	51.19	114	134	K	MKDLNANDVEGAMQIILGSAR	S	Oxidation (M) [1]	1	2	ZP_00998141.1
F056010	O. batsensis HTCC2597	2415	644.685	2.99531	1931.03	1931.03	0.0999465	35.33	88	107	K	SGSKEPGKSTAGTVTVAQVK	E		2	1	ZP_00998141.1
F056010	O. batsensis HTCC2597	1207	768.891	1.99738	1535.77	1535.77	-2.63581	36.19	163	175	R	ETPVELEYTQVTK	Q		0	1	ZP_00998143.1
F056010	O. batsensis HTCC2597	214	541.297	1.99628	1080.58	1080.58	0.946715	15.93	60	68	R	FMPGYVLVR	M		0	1	ZP_00998143.1
F056010	O. batsensis HTCC2597	607	651.351	1.99691	1300.69	1300.69	-0.859545	49.57	2	12	M	ANPIQFINQTR	A		0	2	ZP_00998144.1
F056010	O. batsensis HTCC2597	2915	1061.04	1.9981	2120.06	2120.06	1.04431	24.1	203	221	R	AVDQPFLMPIEDVFSISGR	G		0	1	ZP_00998154.1
F056010	O. batsensis HTCC2597	712	668.307	1.99699	1334.6	1334.6	0.186573	60.45	41	52	R	AYDQIDGAPEEK	A		0	2	ZP_00998154.1
F056010	O. batsensis HTCC2597	1283	521.586	2.99421	1561.74	1561.74	-0.666565	31.67	41	54	R	AYDQIDGAPEEKAR	G		1	2	ZP_00998154.1
F056010	O. batsensis HTCC2597	1918	880.968	1.99771	1759.92	1759.92	1.60064	54.78	356	371	K	FSVELIAPIAMEDGLR	F		0	2	ZP_00998154.1
F056010	O. batsensis HTCC2597	1963	888.964	1.99773	1775.91	1775.91	-0.0574353	21.25	356	371	K	FSVELIAPIAMEDGLR	F	Oxidation (M) [11]	0	1	ZP_00998154.1
F056010	O. batsensis HTCC2597	2048	453.509	3.99112	1810.01	1810.01	0.0209944	25.1	261	277	R	KLLDRGEAGDNIGALLR	G		2	2	ZP_00998154.1
F056010	O. batsensis HTCC2597	1684	561.644	2.99462	1681.91	1681.91	0.3389	32.67	262	277	K	LLDRGEAGDNIGALLR	G		1	2	ZP_00998154.1
F056010	O. batsensis HTCC2597	3594	1253.61	1.99839	2505.2	2505.2	2.21819	44.38	332	355	R	TTDVTGTVTLPEGTEMVMPGDNLK	F		0	4	ZP_00998154.1
F056010	O. batsensis HTCC2597	349	587.838	1.99657	1173.66	1173.66	0.959392	28.51	380	391	R	TVGSGVVSKIVE	-		1	2	ZP_00998154.1
F056010	O. batsensis HTCC2597	350	588.289	1.99658	1174.56	1174.56	0.854787	42.37	110	119	R	ATIWDDELGR	K		0	2	ZP_00998155.1
F056010	O. batsensis HTCC2597	3392	791.076	2.99618	2370.21	2370.21	-0.619777	41.2	127	148	K	QFTVFESLTGETLVGSGLTQTR	E		0	2	ZP_00998155.1
F056010	O. batsensis HTCC2597	955	717.86	1.99719	1433.71	1433.7	1.29176	76.52	53	65	R	SATEEEWVAALTK	A		0	2	ZP_00998155.1
F056010	O. batsensis HTCC2597	4243	832.143	3.99516	3324.54	3324.54	1.26875	15.05	63	91	R	IQNDLFDLGADLCRPDMTSDDKADYAPLR	M		1	1	ZP_00998165.1
F056010	O. batsensis HTCC2597	1947	885.477	1.99772	1768.94	1768.94	0.422287	52.07	142	158	R	LAVALLSEEGCNPVAVK	Y		0	1	ZP_00998165.1
F056010	O. batsensis HTCC2597	829	692.347	1.99709	1382.68	1382.68	0.334134	63.45	50	62	R	LHATDETDAALAR	I		0	4	ZP_00998165.1
F056010	O. batsensis HTCC2597	2032	899.959	1.99776	1797.9	1797.9	1.82324	36.93	173	190	R	VANADGTADVLWVPGASR	-		0	2	ZP_00998165.1
F056010	O. batsensis HTCC2597	2337	637.663	2.99526	1909.97	1909.97	0.201574	24.1	82	100	R	LALELGGTCEGAPGQRGPK	F		1	1	ZP_00998192.1
F056010	O. batsensis HTCC2597	645	656.789	1.99693	1311.56	1311.56	1.16502	17.2	138	148	K	HEVDFLPPDED	-		0	2	ZP_00998219.1
F056010	O. batsensis HTCC2597	3063	1104.05	1.99818	2206.09	2206.09	-0.525364	60.94	8	27	K	SNSGIDDISWNILGQTYVPK	L		0	2	ZP_00998219.1
F056010	O. batsensis HTCC2597	3503	816.765	2.9963	2447.27	2447.27	1.20502	28.79	8	29	K	SNSGIDDISWNILGQTYVPKLK	S		1	2	ZP_00998219.1
F056010	O. batsensis HTCC2597	3381	790.046	2.99618	2367.12	2367.12	0.247559	81.72	27	46	R	VAMFDLLEENSFSLPNRDDR	V		1	2	ZP_00998253.1
F056010	O. batsensis HTCC2597	3755	871.806	2.99653	2612.4	2612.39	1.81175	26.43	85	107	R	LTCQIKVTEALDGLVVQMPEKQI	-		2	2	ZP_00998273.1
F056010	O. batsensis HTCC2597	2223	935.504	1.99785	1868.99	1868.99	1.0182	36.16	91	107	K	VTEALDGLVVQMPEKQI	-		1	2	ZP_00998273.1
F056010	O. batsensis HTCC2597	3440	802.781	2.99624	2405.32	2405.32	1.4127	35.44	55	76	R	EATPAVIETVTEQILLQPAQVR	S		0	2	ZP_00998275.1
F056010	O. batsensis HTCC2597	3306	1164.59	1.99827	2327.16	2327.16	1.28354	88.48	422	443	R	AGDLITEAGQQQIATIGDLEER	V		0	4	ZP_00998277.1
F056010	O. batsensis HTCC2597	3948	932.822	2.99676	2795.44	2795.44	1.12934	51.51	422	448	R	AGDLITEAGQQQIATIGDLEERVAAAR	D		1	2	ZP_00998277.1
F056010	O. batsensis HTCC2597	959	718.358	1.9972	1434.7	1434.7	1.79968	54.58	2	14	M	ADSLDFSLVSPER	S		0	2	ZP_00998364.1
F056010	O. batsensis HTCC2597	380	599.294	1.99664	1196.57	1196.57	1.0973	33.39	502	512	K	AAIDEFAKDFA	-		1	2	ZP_00998368.1
F056010	O. batsensis HTCC2597	1587	552.324	2.99453	1653.95	1653.95	0.327701	56.5	68	83	K	AISALADKMGLPQVLK	N		1	2	ZP_00998369.1
F056010	O. batsensis HTCC2597	365	396.212	2.99237	1185.61	1185.61	-0.286771	29.39	53	62	R	DLIHSPVYSR	E		0	3	ZP_00998369.1
F056010	O. batsensis HTCC2597	2242	937.511	1.99785	1873.01	1873	1.84356	94.03	107	124	R	ELIATEKGEVTAEVVSAK	A		1	4	ZP_00998369.1
F056010	O. batsensis HTCC2597	851	698.938	1.99712	1395.86	1395.86	0.464946	43.72	95	106	R	LFVLPQLVAQLR	E		0	2	ZP_00998369.1
F056010	O. batsensis HTCC2597	1602	829.473	1.99757	1656.93	1656.93	0.877527	97.23	148	163	K	LNTSVDESLIGGLIVK	V		0	2	ZP_00998369.1
F056010	O. batsensis HTCC2597	2703	677.057	2.99554	2028.15	2028.15	0.939281	36.61	148	167	K	LNTSVDESLIGGLIVKVGSK	M		1	2	ZP_00998369.1
F056010	O. batsensis HTCC2597	1257	518.328	2.99417	1551.96	1551.96	0.365989	41.37	94	106	R	RLFVLPQLVAQLR	E		1	2	ZP_00998369.1
F056010	O. batsensis HTCC2597	614	651.877	1.99691	1301.74	1301.74	1.3651	74.96	1	11	-	MIIQSISEIIR	N		0	2	ZP_00998416.1
F056010	O. batsensis HTCC2597	2170	926.434	1.99783	1850.85	1850.85	-0.424128	32.91	33	48	K	MSMNPFDEIAVEEAIR	L		0	1	ZP_00998422.1
F056010	O. batsensis HTCC2597	2431	647.364	2.99533	1939.07	1939.07	1.29392	20.9	118	135	K	HIFVSEARPGTLLPAGFK	T		0	1	ZP_00998428.1
F056010	O. batsensis HTCC2597	3348	782.74	2.99614	2345.2	2345.19	1.78749	22.51	46	67	R	CGQAVVKEVEGAYAPEIKLGDL	-		2	2	ZP_00998446.1
F056010	O. batsensis HTCC2597	761	452.921	2.99333	1355.74	1355.74	-0.317907	57.13	75	87	R	RAAVTAGSAHFLR	T		1	2	ZP_00998462.1
F056010	O. batsensis HTCC2597	1577	551.299	2.99452	1650.88	1650.88	-0.155069	48.09	57	70	R	DVVKDLPTHLDLMR	L		1	2	ZP_00998490.1
F056010	O. batsensis HTCC2597	2820	692.71	2.99564	2075.11	2075.11	1.03802	34.84	77	95	R	VNLHIPVEFINEDAAPGIK	R		0	2	ZP_00998490.1
F056010	O. batsensis HTCC2597	660	657.826	1.99694	1313.64	1313.64	0.178131	23.17	148	159	R	FSQPTEPPAQGR	E		0	2	ZP_00998492.1
F056010	O. batsensis HTCC2597	2655	1006.97	1.998	2011.93	2011.92	1.93596	58.98	148	167	R	FSQPTEPPAQGREAGPGGET	-		1	2	ZP_00998492.1
F056010	O. batsensis HTCC2597	3742	867.748	2.99652	2600.22	2600.22	-0.278053	30.96	86	107	R	LTDVGFDISQMSQNYYYTATKR	L		1	2	ZP_00998492.1
F056010	O. batsensis HTCC2597	637	654.899	1.99692	1307.78	1307.78	1.66924	21.79	108	119	R	AALDIVPLEVLR	Q		0	2	ZP_00998496.1
F056010	O. batsensis HTCC2597	2466	976.461	1.99794	1950.91	1950.91	0.350606	61.06	85	101	R	IEGMGYFDPDIVTFYGK	D		0	2	ZP_00998508.1
F056010	O. batsensis HTCC2597	3637	842.394	2.99641	2524.16	2524.16	1.43454	27.02	85	107	R	IEGMGYFDPDIVTFYGKDASGSR	T		1	2	ZP_00998508.1
F056010	O. batsensis HTCC2597	3050	731.313	2.99587	2190.92	2190.92	0.112282	50.71	1	20	-	MTEDDISTSAEAHENSAMPR	R		0	2	ZP_00998508.1
F056010	O. batsensis HTCC2597	2765	687.633	2.99561	2059.88	2059.88	0.644699	50.05	2	20	M	TEDDISTSAEAHENSAMPR	R		0	2	ZP_00998508.1
F056010	O. batsensis HTCC2597	2822	692.965	2.99564	2075.87	2075.87	0.726924	34.76	2	20	M	TEDDISTSAEAHENSAMPR	R	Oxidation (M) [17]	0	2	ZP_00998508.1
F056010	O. batsensis HTCC2597	1788	575.001	2.99474	1721.98	1721.98	0.842635	46.09	108	122	R	TQLIQHVSQLSVTLR	A		0	2	ZP_00998508.1
F056010	O. batsensis HTCC2597	2924	708.991	2.99574	2123.95	2123.95	2.10975	26.24	6	23	K	HGEMDIEDQEKTFDGFVK	M		1	1	ZP_00998509.1
F056010	O. batsensis HTCC2597	2277	628.32	2.99519	1881.94	1881.94	1.4246	46.73	131	149	K	ANGPVGAAHCAQSTSTILK	G		0	2	ZP_00998510.1
F056010	O. batsensis HTCC2597	105	488.267	1.99587	974.518	974.519	-0.0779872	19.37	150	158	K	GLPGFESIR	Q		0	2	ZP_00998510.1
F056010	O. batsensis HTCC2597	864	702.386	1.99713	1402.76	1402.76	0.721437	58.87	165	177	R	KLESQFSAIPGAR	S		1	2	ZP_00998510.1
F056010	O. batsensis HTCC2597	3284	774.381	2.9961	2320.12	2320.12	1.13442	22.83	165	185	R	KLESQFSAIPGARSETIEEND	-		2	2	ZP_00998510.1
F056010	O. batsensis HTCC2597	1827	868.501	1.99768	1734.99	1734.99	0.0414988	65.91	113	128	K	LTVPVTPEVAELALQR	V		0	4	ZP_00998510.1
F056010	O. batsensis HTCC2597	1966	593.331	2.99491	1776.97	1776.97	-0.572321	32.53	36	51	R	NTGPTSLTLYTVINKR	S		1	2	ZP_00998510.1
F056010	O. batsensis HTCC2597	3658	844.808	2.99642	2531.4	2531.4	1.12744	35.08	106	128	R	SAFYVTKLTVPVTPEVAELALQR	V		1	2	ZP_00998510.1
F056010	O. batsensis HTCC2597	3660	845.738	2.99643	2534.19	2534.19	-0.261622	41.99	52	77	R	SGAGGHTALEVDGSESVLFDPAGSFK	A		0	1	ZP_00998510.1
F056010	O. batsensis HTCC2597	3478	809.712	2.99627	2426.11	2426.11	0.004534	28.7	84	105	R	SGDVLYGFSPSVEEAYQSQHAR	S		0	2	ZP_00998510.1
F056010	O. batsensis HTCC2597	305	575.311	1.9965	1148.61	1148.61	0.118404	60.85	9	19	R	AGFTALEAELK	H		0	2	ZP_00998515.1
F056010	O. batsensis HTCC2597	1182	509.956	2.99407	1526.85	1526.85	0.936571	35.29	9	22	R	AGFTALEAELKHLK	S		1	3	ZP_00998515.1
F056010	O. batsensis HTCC2597	1110	751.397	1.99732	1500.78	1500.78	1.25402	77.47	127	140	R	ALIGKEEGDSVEVR	T		1	4	ZP_00998515.1
F056010	O. batsensis HTCC2597	1400	799.439	1.99748	1596.86	1596.86	1.00823	34.89	64	78	K	ELEGVISLADVIDPK	T		0	1	ZP_00998515.1
F056010	O. batsensis HTCC2597	2463	649.973	2.99535	1946.9	1946.9	0.272228	35.25	38	54	R	ELGDLSENAEYHSAREK	Q		1	2	ZP_00998515.1
F056010	O. batsensis HTCC2597	2129	920.028	1.99781	1838.04	1838.04	0.758417	86.49	62	78	R	IKELEGVISLADVIDPK	T		1	4	ZP_00998515.1
F056010	O. batsensis HTCC2597	3577	832.484	2.99637	2494.43	2494.43	1.27925	42.74	62	85	R	IKELEGVISLADVIDPKTLSGAVK	F		2	4	ZP_00998515.1
F056010	O. batsensis HTCC2597	134	335.845	2.991	1004.51	1004.51	-0.604272	15.6	1	8	-	MEKIPMTR	A		1	1	ZP_00998515.1
F056010	O. batsensis HTCC2597	461	622.824	1.99677	1243.63	1243.63	-0.10212	44.91	147	156	R	SYEILKIEYS	-		1	2	ZP_00998515.1
F056010	O. batsensis HTCC2597	4123	1014.14	2.99702	3039.41	3039.41	0.57248	42.7	90	115	K	VTVVDEDTDEEKTWQIVGEYEADIEK	G		1	1	ZP_00998515.1
F056010	O. batsensis HTCC2597	1289	782.957	1.99743	1563.9	1563.9	0.665644	55.96	25	38	R	NIVELQLLPEGLAR	I		0	2	ZP_00998522.1
F056010	O. batsensis HTCC2597	4279	1123.21	2.99731	3366.6	3366.6	1.23894	56.3	521	553	R	EIAEEKEAVEQYGSSDSGASLGDILGAALKSNE	-		2	1	ZP_00998524.1
F056010	O. batsensis HTCC2597	2734	681.695	2.99557	2042.06	2042.06	-0.0024485	33.17	56	74	R	TLTATDLEAADLRTPEVAR	A		1	2	ZP_00998530.1
F056010	O. batsensis HTCC2597	127	499.767	1.99597	997.52	997.519	0.809007	24.33	33	41	R	QALADLDPR	A		0	1	ZP_00998540.1
F056010	O. batsensis HTCC2597	1090	499.256	2.99395	1494.75	1494.75	-0.556616	17.95	11	24	R	LNSTAGTGHFYVTK	K		0	2	ZP_00998543.1
F056010	O. batsensis HTCC2597	1467	406.718	3.99009	1622.84	1622.84	0.0221833	16.68	11	25	R	LNSTAGTGHFYVTKK	N		1	1	ZP_00998543.1
F056010	O. batsensis HTCC2597	1893	876.004	1.9977	1749.99	1749.99	2.96688	37.56	127	144	K	ASGSLPVPITIVPGDLSK	E		0	2	ZP_00998547.1
F056010	O. batsensis HTCC2597	3665	845.816	2.99643	2534.42	2534.42	1.68559	18.03	127	151	K	ASGSLPVPITIVPGDLSKEKLEAIT	-		2	1	ZP_00998547.1
F056010	O. batsensis HTCC2597	295	570.325	1.99647	1138.64	1138.63	0.733334	48.44	76	85	R	QGVDPELIIR	E		0	2	ZP_00998547.1
F056010	O. batsensis HTCC2597	311	577.332	1.99651	1152.65	1152.65	-0.365245	53.98	115	126	K	SGPGPLVSQLAK	A		0	2	ZP_00998547.1
F056010	O. batsensis HTCC2597	4042	973.505	2.9969	2917.49	2917.48	3.57329	27.04	16	44	K	FLPGQTVLEAGTADFPSAETSGKSPLAAR	L		1	1	ZP_00998550.1
F056010	O. batsensis HTCC2597	1426	536.963	2.99437	1607.87	1607.87	0.0186583	29.61	174	187	R	HYIPEVTEVRPVAV	-		0	2	ZP_00998550.1
F056010	O. batsensis HTCC2597	1661	839.431	1.9976	1676.85	1676.84	1.25414	68.16	1	15	-	MFIQTESTPNPATLK	F		0	2	ZP_00998550.1
F056010	O. batsensis HTCC2597	2231	624.327	2.99516	1869.96	1869.96	1.18826	28.15	33	49	R	EYLAAVEHVVGEQSAIR	T		0	1	ZP_00998561.1
F056010	O. batsensis HTCC2597	680	664.422	1.99697	1326.83	1326.83	0.888586	49.84	105	116	R	ILYGANLPLLIK	L		0	2	ZP_00998561.1
F056010	O. batsensis HTCC2597	3691	851.399	2.99645	2551.18	2551.18	0.251649	29.35	212	233	R	SVDPEFSAIETLYGIGYRYNEE	-		1	1	ZP_00998565.1
F056010	O. batsensis HTCC2597	471	624.875	1.99678	1247.74	1247.74	0.173915	41.97	163	176	R	GVLLGGVPGVAPGR	V		0	2	ZP_00998573.1
F056010	O. batsensis HTCC2597	4330	883.954	3.99544	3531.79	3531.78	2.75414	49.24	356	387	R	ITCRPVAEAQGLDWISAEEALARLPDRTPEPA	-		2	2	ZP_00998573.1
F056010	O. batsensis HTCC2597	1997	595.661	2.99493	1783.96	1783.96	1.2433	35.71	314	329	R	TSTYALNNATLPHLLR	M		0	2	ZP_00998573.1
F056010	O. batsensis HTCC2597	1099	750.407	1.99732	1498.8	1498.8	0.487057	69.42	23	36	R	VGLTPESVAELTQR	G		0	2	ZP_00998573.1
F056010	O. batsensis HTCC2597	3067	738.695	2.99591	2213.06	2213.06	0.310429	28.91	166	185	K	AADANKMIDDSIDTVEQKLH	-		2	2	ZP_00998600.1
F056010	O. batsensis HTCC2597	806	687.847	1.99707	1373.68	1373.68	0.591841	34.17	61	72	R	ADQIRSELDEAK	S		1	3	ZP_00998600.1
F056010	O. batsensis HTCC2597	1837	869.022	1.99768	1736.03	1736.03	-0.907242	58.25	148	165	R	AVAVAIAAAREVIAGQVK	A		1	4	ZP_00998600.1
F056010	O. batsensis HTCC2597	2634	668.34	2.99548	2002	2002	1.2058	44.06	106	124	K	EASDSAAQAKLDLEASIQR	R		1	2	ZP_00998600.1
F056010	O. batsensis HTCC2597	2971	720.374	2.99581	2158.1	2158.1	0.699227	21.69	106	125	K	EASDSAAQAKLDLEASIQRR	L		2	2	ZP_00998600.1
F056010	O. batsensis HTCC2597	1353	529.282	2.99429	1584.82	1584.82	0.449262	32.24	91	104	K	EVQAQADRIVETAR	K		1	2	ZP_00998600.1
F056010	O. batsensis HTCC2597	1770	571.98	2.99472	1712.92	1712.92	0.558112	60.75	91	105	K	EVQAQADRIVETARK	E		2	2	ZP_00998600.1
F056010	O. batsensis HTCC2597	1548	822.926	1.99755	1643.84	1643.84	0.894249	96.99	126	142	R	LAAAEDQIASAEASAVK	E		0	2	ZP_00998600.1
F056010	O. batsensis HTCC2597	2629	667.689	2.99547	2000.05	2000.04	1.31497	29.74	126	145	R	LAAAEDQIASAEASAVKEVK	D		1	2	ZP_00998600.1
F056010	O. batsensis HTCC2597	3188	758.066	2.99601	2271.18	2271.17	2.85271	31.39	126	147	R	LAAAEDQIASAEASAVKEVKDR	A		2	4	ZP_00998600.1
F056010	O. batsensis HTCC2597	845	697.33	1.99711	1392.65	1392.64	0.711596	77.45	172	183	K	MIDDSIDTVEQK	L		0	2	ZP_00998600.1
F056010	O. batsensis HTCC2597	1545	822.402	1.99755	1642.79	1642.79	1.34954	61.72	172	185	K	MIDDSIDTVEQKLH	-		1	4	ZP_00998600.1
F056010	O. batsensis HTCC2597	1611	553.935	2.99454	1658.78	1658.78	0.435259	41.94	172	185	K	MIDDSIDTVEQKLH	-	Oxidation (M) [1]	1	2	ZP_00998600.1
F056010	O. batsensis HTCC2597	3602	836.758	2.99639	2507.25	2507.25	0.756606	29.78	66	87	R	SELDEAKSLREEAQALLASYER	K		2	2	ZP_00998600.1
F056010	O. batsensis HTCC2597	1823	868.453	1.99768	1734.89	1734.89	0.950493	63.34	73	87	K	SLREEAQALLASYER	K		1	4	ZP_00998600.1
F056010	O. batsensis HTCC2597	2194	622.003	2.99514	1862.99	1862.98	1.35106	30.77	73	88	K	SLREEAQALLASYERK	Q		2	2	ZP_00998600.1
F056010	O. batsensis HTCC2597	1708	564.957	2.99465	1691.85	1691.85	0.10521	37.57	82	97	K	AKDAEAAYEKALADAR	V		2	2	ZP_00998601.1
F056010	O. batsensis HTCC2597	1081	498.58	2.99394	1492.72	1492.72	1.03369	36.19	84	97	K	DAEAAYEKALADAR	V		1	2	ZP_00998601.1
F056010	O. batsensis HTCC2597	2771	688.343	2.99561	2062.01	2062.01	0.241512	22.86	84	102	K	DAEAAYEKALADARVEANR	I		2	2	ZP_00998601.1
F056010	O. batsensis HTCC2597	2872	1051.54	1.99808	2101.06	2101.05	2.67247	80.46	109	129	R	SEIQADLDAATAKADAEIAAK	T		1	3	ZP_00998601.1
F056010	O. batsensis HTCC2597	559	644.349	1.99687	1286.68	1286.68	-0.104921	51.1	130	141	K	TAEGEKAIAEIR	A		1	4	ZP_00998601.1
F056010	O. batsensis HTCC2597	1199	766.894	1.99737	1531.77	1531.77	0.586902	88.56	65	79	R	TGTITNDIAAAEDLK	Q		0	2	ZP_00998601.1
F056010	O. batsensis HTCC2597	2007	894.971	1.99775	1787.93	1787.93	0.875316	91.38	65	81	R	TGTITNDIAAAEDLKQK	A		1	4	ZP_00998601.1
F056010	O. batsensis HTCC2597	1756	854.383	1.99764	1706.75	1706.75	1.54973	91.07	90	107	R	TSAEFGGNTAAGDAPADR	E		0	2	ZP_00998604.1
F056010	O. batsensis HTCC2597	3417	798.678	2.99622	2393.01	2393.01	0.240283	61.57	90	114	R	TSAEFGGNTAAGDAPADREGGRDGD	-		2	2	ZP_00998604.1
F056010	O. batsensis HTCC2597	1448	808.91	1.99751	1615.81	1615.81	0.693153	72.28	26	40	R	NSAQADDLVQDTIVK	A		0	1	ZP_00998618.1
F056010	O. batsensis HTCC2597	630	654.838	1.99692	1307.66	1307.66	-0.0191181	49.01	162	173	R	ADLVAYLQSISE	-		0	2	ZP_00998635.1
F056010	O. batsensis HTCC2597	1757	854.431	1.99764	1706.85	1706.85	-0.618684	60.62	158	173	K	AGDRADLVAYLQSISE	-		1	2	ZP_00998635.1
F056010	O. batsensis HTCC2597	1700	845.925	1.99762	1689.83	1689.83	1.43091	70.54	92	108	K	IDGSNATGPYLDGVVGR	A		0	2	ZP_00998635.1
F056010	O. batsensis HTCC2597	2111	918.479	1.99781	1834.94	1834.94	0.974962	39.72	157	173	R	KAGDRADLVAYLQSISE	-		2	4	ZP_00998635.1
F056010	O. batsensis HTCC2597	225	544.262	1.9963	1086.51	1086.51	0.451906	37.88	1	9	-	MFDTMTLTK	A		0	2	ZP_00998635.1
F056010	O. batsensis HTCC2597	11	391.205	1.99485	780.395	780.395	0.019221	35.16	150	156	K	MSFAGIR	K		0	1	ZP_00998635.1
F056010	O. batsensis HTCC2597	967	721.879	1.99721	1441.74	1441.74	1.10353	23.18	148	161	K	EVDAAALAVTETPR	Q		0	2	ZP_00998640.1
F056010	O. batsensis HTCC2597	3120	746.742	2.99595	2237.2	2237.2	0.909172	46.95	148	168	K	EVDAAALAVTETPRQVADILR	Y		1	2	ZP_00998640.1
F056010	O. batsensis HTCC2597	478	628.355	1.99679	1254.69	1254.69	1.31984	67.04	99	110	R	NAIEAADVVVVR	F		0	2	ZP_00998640.1
F056010	O. batsensis HTCC2597	107	488.284	1.99587	974.553	974.555	-1.91677	22.59	169	177	R	YVLTGRLPG	-		1	2	ZP_00998640.1
F056010	O. batsensis HTCC2597	3498	815.438	2.99629	2443.29	2443.3	-1.61053	52.95	115	137	R	KPEAPAEAQPAGPTELDVLLEIR	D		0	2	ZP_00998642.1
F056010	O. batsensis HTCC2597	4036	729.643	3.99448	2914.54	2914.54	0.736995	22.75	115	141	R	KPEAPAEAQPAGPTELDVLLEIRDSLR	K		1	2	ZP_00998642.1
F056010	O. batsensis HTCC2597	4127	761.668	3.99471	3042.64	3042.63	1.96967	20.29	115	142	R	KPEAPAEAQPAGPTELDVLLEIRDSLRK	S		2	2	ZP_00998642.1
F056010	O. batsensis HTCC2597	3972	945.128	2.9968	2832.36	2832.36	1.76143	41.41	50	74	K	GFDPIANNQLTQDEIDKAEADPLYR	L		1	2	ZP_00998650.1
F056010	O. batsensis HTCC2597	1514	818.429	1.99754	1634.84	1634.84	3.44621	15.69	107	121	K	LTEGLGLPADFKMPF	-		1	1	ZP_00998653.1
F056010	O. batsensis HTCC2597	2149	614.967	2.99509	1841.88	1841.88	0.85945	34.35	32	47	K	VVALQEEMNHMTVEGR	S		0	2	ZP_00998653.1
F056010	O. batsensis HTCC2597	1117	752.412	1.99732	1502.81	1502.81	0.511043	70.81	81	94	R	FINGLSLAGIEVDR	K		0	1	ZP_00998664.1
F056010	O. batsensis HTCC2597	1489	816.46	1.99753	1630.9	1630.9	0.375252	67.24	81	95	R	FINGLSLAGIEVDRK	V		1	2	ZP_00998664.1
F056010	O. batsensis HTCC2597	3060	734.051	2.99588	2199.13	2199.13	0.857158	55.79	29	48	R	STTFKVATQAVDKANQYATR	D		2	2	ZP_00998664.1
F056010	O. batsensis HTCC2597	1511	818.426	1.99754	1634.84	1634.84	0.264246	59.74	34	48	K	VATQAVDKANQYATR	D		1	4	ZP_00998664.1
F056010	O. batsensis HTCC2597	2327	636.329	2.99525	1905.97	1905.97	-0.102835	24.63	34	50	K	VATQAVDKANQYATRDR	K		2	1	ZP_00998664.1
F056010	O. batsensis HTCC2597	2548	660.687	2.99543	1979.04	1979.04	1.10155	32.57	96	114	K	VLADLAVHEPDAFGAIVDK	A		0	1	ZP_00998664.1
F056010	O. batsensis HTCC2597	3037	727.065	2.99584	2178.17	2178.17	1.61374	70.98	96	116	K	VLADLAVHEPDAFGAIVDKAK	A		1	2	ZP_00998664.1
F056010	O. batsensis HTCC2597	3991	954.421	2.99683	2860.24	2860.24	0.466394	42.9	66	89	R	EAFYGMPYDDWKAQNQTEASPEQR	Q		1	2	ZP_00998668.1
F056010	O. batsensis HTCC2597	1868	871.921	1.99769	1741.83	1741.83	0.410488	47.73	90	104	R	QAFDTAFRENVTDKT	-		2	2	ZP_00998668.1
F056010	O. batsensis HTCC2597	121	496.283	1.99594	990.551	990.55	1.05295	47.36	72	80	R	YADVAIIAR	S		0	2	ZP_00998672.1
F056010	O. batsensis HTCC2597	1618	830.903	1.99758	1659.79	1659.79	1.10135	104.49	52	68	K	GVLGDTMNVEEGAAAAR	L		0	2	ZP_00998676.1
F056010	O. batsensis HTCC2597	1656	838.9	1.9976	1675.79	1675.78	1.7359	90.29	52	68	K	GVLGDTMNVEEGAAAAR	L	Oxidation (M) [7]	0	2	ZP_00998676.1
F056010	O. batsensis HTCC2597	321	579.339	1.99652	1156.66	1156.66	0.397696	64.44	69	79	R	LCGLALLAQAK	A		0	2	ZP_00998676.1
F056010	O. batsensis HTCC2597	1978	594.64	2.99492	1780.9	1780.9	-0.446404	29	95	110	K	LTAFVNSTKEFGDQPK	V		1	1	ZP_00998676.1
F056010	O. batsensis HTCC2597	2296	943.987	1.99787	1885.96	1885.96	1.31286	89.92	111	128	K	VVNGCSDLLVEILGDAGR	H		0	4	ZP_00998676.1
F056010	O. batsensis HTCC2597	3171	567.545	3.9929	2266.15	2266.15	0.387	72.15	111	131	K	VVNGCSDLLVEILGDAGRHSR	S		1	3	ZP_00998676.1
F056010	O. batsensis HTCC2597	4141	1020.86	2.99704	3059.57	3059.57	1.28057	60.15	2	30	M	AISKGDTLPDATLVEFTAEGPKEVSLSER	L		2	4	ZP_00998681.1
F056010	O. batsensis HTCC2597	1603	829.932	1.99757	1657.85	1657.85	0.154417	74.71	110	125	K	AVGMDFTAPPVGLIDR	S		0	2	ZP_00998681.1
F056010	O. batsensis HTCC2597	3828	887.781	2.9966	2660.32	2660.32	1.04198	16.3	6	30	K	GDTLPDATLVEFTAEGPKEVSLSER	L		1	1	ZP_00998681.1
F056010	O. batsensis HTCC2597	3863	898.136	2.99664	2691.39	2691.38	0.57554	63.68	35	59	R	NVVIFALPGAYTGTCTTAHVPSFIR	T		0	2	ZP_00998681.1
F056010	O. batsensis HTCC2597	531	638.819	1.99685	1275.62	1275.62	1.63842	74.53	80	92	R	AADAGVENVGFAR	H		0	2	ZP_00998689.1
F056010	O. batsensis HTCC2597	1006	731.372	1.99725	1460.73	1460.73	0.221807	88.58	186	199	R	IVEAENMGGAVVTR	F	Oxidation (M) [7]	0	1	ZP_00998689.1
F056010	O. batsensis HTCC2597	3040	729.755	2.99586	2186.24	2186.24	0.13402	30.75	56	77	K	LAPHAAVVLATDLSGALLDIAR	Q		0	2	ZP_00998689.1
F056010	O. batsensis HTCC2597	506	632.791	1.99682	1263.57	1263.57	0.180442	53.24	139	149	K	TGCLAENWTGR	L		0	1	ZP_00998689.1
F056010	O. batsensis HTCC2597	198	536.785	1.99625	1071.56	1071.56	0.404085	74.54	172	181	R	VAEVEAAVER	Q		0	2	ZP_00998689.1
F056010	O. batsensis HTCC2597	1177	509.614	2.99407	1525.82	1525.82	-0.888702	22.78	172	185	R	VAEVEAAVERQGLR	I		1	1	ZP_00998689.1
F056010	O. batsensis HTCC2597	909	709.39	1.99716	1416.77	1416.76	0.553373	50.18	42	55	R	VLEVGCGTGTIALK	L		0	1	ZP_00998689.1
F056010	O. batsensis HTCC2597	2192	932.493	1.99784	1862.97	1862.97	0.380038	31.56	5	21	R	DLPTALDLPMVDPLPEK	T		0	1	ZP_00998712.1
F056010	O. batsensis HTCC2597	3082	1111.09	1.99819	2220.17	2220.17	0.130621	48.07	5	24	R	DLPTALDLPMVDPLPEKTQK	Y		1	3	ZP_00998712.1
F056010	O. batsensis HTCC2597	128	499.795	1.99597	997.575	997.574	1.18588	31.39	33	41	K	LGMVPNVLR	A		0	1	ZP_00998712.1
F056010	O. batsensis HTCC2597	2713	677.982	2.99554	2030.92	2030.92	0.229452	46.44	173	190	R	VASATDMRPNDEYHAQAR	-		0	2	ZP_00998712.1
F056010	O. batsensis HTCC2597	2748	685.018	2.99559	2052.03	2052.03	1.35671	30.72	25	41	K	YFNVCQDKLGMVPNVLR	A		1	2	ZP_00998712.1
F056010	O. batsensis HTCC2597	2134	460.94	3.99126	1839.73	1839.73	-0.505508	23.93	116	131	R	GCHDMCAGHAPELEEK	S		0	1	ZP_00998722.1
F056010	O. batsensis HTCC2597	1337	790.376	1.99745	1578.74	1578.74	-0.0608081	60.94	68	81	K	IADLMEMDQSALSR	G		0	2	ZP_00998744.1
F056010	O. batsensis HTCC2597	1118	755.374	1.99733	1508.73	1508.73	0.471256	46.36	35	46	R	FDLPMEDFLLNR	Y		0	2	ZP_00998760.1
F056010	O. batsensis HTCC2597	1880	872.94	1.99769	1743.87	1743.86	0.645693	79.83	19	35	K	DGDTGSPEVQVAILTSR	I		0	3	ZP_00998764.1
F056010	O. batsensis HTCC2597	3881	678.1	3.99406	2708.37	2708.37	0.522824	17.3	11	35	R	LMKEYATKDGDTGSPEVQVAILTSR	I		2	1	ZP_00998764.1
F056010	O. batsensis HTCC2597	1016	734.849	1.99726	1467.68	1467.68	0.0715413	87.19	140	152	R	AYDNQTLDSQSVK	W		0	2	ZP_00998776.1
F056010	O. batsensis HTCC2597	265	560.259	1.9964	1118.5	1118.5	-0.55163	17.35	131	139	R	IFGGDEYYR	A		0	1	ZP_00998776.1
F056010	O. batsensis HTCC2597	3269	770.385	2.99608	2308.13	2308.13	1.98039	45.07	64	86	R	TDQQPIADAVAALGGNPSALEDR	G		0	2	ZP_00998776.1
F056010	O. batsensis HTCC2597	2362	959.464	1.9979	1916.91	1916.91	0.864411	76.52	154	171	K	DTFSLTGYTAAVTEAQSR	C		0	2	ZP_00998780.1
F056010	O. batsensis HTCC2597	3437	802.731	2.99624	2405.17	2405.17	0.542997	34.84	149	171	R	GTTTKDTFSLTGYTAAVTEAQSR	C		1	2	ZP_00998780.1
F056010	O. batsensis HTCC2597	3867	898.762	2.99664	2693.26	2693.26	1.32627	19.65	149	173	R	GTTTKDTFSLTGYTAAVTEAQSRCQ	-		2	1	ZP_00998780.1
F056010	O. batsensis HTCC2597	1137	758.438	1.99734	1514.86	1514.86	0.652205	50.95	130	145	R	IVAAMKAGASAIVTGR	S		1	3	ZP_00998780.1
F056010	O. batsensis HTCC2597	1924	587.947	2.99486	1760.82	1760.82	1.03929	45.94	52	66	R	EIADETQSADELRER	L		1	4	ZP_00998817.1
F056010	O. batsensis HTCC2597	976	724.857	1.99722	1447.7	1447.69	3.6907	55.5	157	168	R	QADNFIELDDLR	D		0	2	ZP_00998819.1
F056010	O. batsensis HTCC2597	3578	833.772	2.99638	2498.29	2498.29	0.831768	29.04	111	132	R	VDHIVLFSGDGDFRPLVESLQR	Q		0	2	ZP_00998819.1
F056010	O. batsensis HTCC2597	1179	509.946	2.99407	1526.81	1526.82	-0.999465	17.96	58	72	R	LAVVDASGERGQAVR	M		1	1	ZP_00998827.1
F056010	O. batsensis HTCC2597	2608	999.993	1.99799	1997.97	1997.97	1.31483	127.91	28	47	R	AAFGLDYTDAAGAASVTELR	T		0	4	ZP_00998836.1
F056010	O. batsensis HTCC2597	1143	759.357	1.99735	1516.7	1516.7	1.18943	19.02	285	298	R	NTTDRATMGVAFSF	-		1	2	ZP_00998836.1
F056010	O. batsensis HTCC2597	908	709.388	1.99716	1416.76	1416.76	0.273158	72.17	117	129	R	ATIYIVDPALDAR	S		0	2	ZP_00998837.1
F056010	O. batsensis HTCC2597	117	494.277	1.99592	986.54	986.54	0.00608186	46.61	149	157	R	AVEDAILTR	A		0	2	ZP_00998837.1
F056010	O. batsensis HTCC2597	2042	603.329	2.99499	1806.96	1806.96	0.649156	30.62	114	129	R	AYRATIYIVDPALDAR	S		1	2	ZP_00998837.1
F056010	O. batsensis HTCC2597	1785	574.625	2.99474	1720.85	1720.85	-0.258593	19.54	25	41	R	FGGGRPIFQGTDPGTSK	E		0	2	ZP_00998837.1
F056010	O. batsensis HTCC2597	2344	638.013	2.99526	1911.02	1911.02	0.511246	39.49	139	157	R	GGPVATGTQRAVEDAILTR	A		1	2	ZP_00998837.1
F056010	O. batsensis HTCC2597	736	449.578	2.99328	1345.71	1345.71	0.535777	37.36	53	64	R	GRTGTTLWDAIR	G		1	3	ZP_00998837.1
F056010	O. batsensis HTCC2597	136	503.772	1.996	1005.53	1005.53	0.733943	31.62	130	138	R	SLNVSVMTR	G		0	2	ZP_00998837.1
F056010	O. batsensis HTCC2597	148	511.769	1.99606	1021.52	1021.52	0.605958	41.4	130	138	R	SLNVSVMTR	G	Oxidation (M) [7]	0	2	ZP_00998837.1
F056010	O. batsensis HTCC2597	286	567.302	1.99645	1132.59	1132.59	0.680742	69.34	55	64	R	TGTTLWDAIR	G		0	2	ZP_00998837.1
F056010	O. batsensis HTCC2597	4439	1308.01	2.99769	3921	3921	-0.707728	22.53	77	113	R	YLWNASLEVLDFLPVQSVDPFTGVIVTGYGTPPGGGR	A		0	1	ZP_00998837.1
F056010	O. batsensis HTCC2597	1745	853.423	1.99764	1704.83	1704.83	0.31616	92.02	106	122	R	VSSFTGYSATGTTVATR	A		0	2	ZP_00998840.1
F056010	O. batsensis HTCC2597	1627	832.885	1.99758	1663.75	1663.75	0.481441	66.14	66	81	R	LRDEEAAASSTEELGS	-		1	2	ZP_00998846.1
F056010	O. batsensis HTCC2597	546	642.341	1.99686	1282.67	1282.67	0.97921	15.46	124	135	K	LGFLPQPSDPGR	M		0	1	ZP_00998851.1
F056010	O. batsensis HTCC2597	1098	749.877	1.99731	1497.74	1497.74	2.36424	48.03	168	180	K	FAVESEALQDYVK	R		0	2	ZP_00998854.1
F056010	O. batsensis HTCC2597	1586	827.926	1.99757	1653.84	1653.84	0.747353	43.76	168	181	K	FAVESEALQDYVKR	M		1	3	ZP_00998854.1
F056010	O. batsensis HTCC2597	4211	640.148	4.99213	3195.7	3195.7	1.55459	21.86	44	73	R	LGKMPVLLDQGEAITDSAAILTYLADRHGK	M		2	1	ZP_00998854.1
F056010	O. batsensis HTCC2597	4025	725.382	3.99445	2897.5	2897.5	1.66661	21.35	47	73	K	MPVLLDQGEAITDSAAILTYLADRHGK	M		1	1	ZP_00998854.1
F056010	O. batsensis HTCC2597	1928	882.438	1.99772	1762.86	1762.86	0.498054	34.18	15	28	R	VIWMLEELGEPYER	V		0	4	ZP_00998854.1
F056010	O. batsensis HTCC2597	3619	1258.61	1.9984	2515.2	2515.19	1.95333	94.21	56	81	R	AAEEKVEAITADAEGNATGTTPAEGL	-		1	4	ZP_00998857.1
F056010	O. batsensis HTCC2597	2721	1017.52	1.99802	2033.04	2033.03	1.847	55.15	2	19	M	SEVPTGESLLFLTDEQLR	Q		0	1	ZP_00998860.1
F056010	O. batsensis HTCC2597	439	616.331	1.99673	1230.65	1230.65	0.876776	44.21	84	94	R	TLIEDGLVESR	V		0	2	ZP_00998860.1
F056010	O. batsensis HTCC2597	989	727.381	1.99723	1452.75	1452.75	0.57202	25.43	82	95	R	HATAESDIILVEGV	-		0	1	ZP_00998865.1
F056010	O. batsensis HTCC2597	4069	986.129	2.99694	2955.36	2955.36	1.36092	20.94	147	173	R	ADLLPDGAEAPDSICAFFDTETYPGKR	A		1	1	ZP_00998866.1
F056010	O. batsensis HTCC2597	1015	734.401	1.99726	1466.79	1466.79	-0.780617	49	2	16	M	SGLVTIFGGSGFLGR	Y		0	1	ZP_00998913.1
F056010	O. batsensis HTCC2597	3710	1281.57	1.99843	2561.12	2561.12	1.52004	55.1	127	148	R	FVPKDEMEAEGYGDYLDQVEDI	-		1	2	ZP_00998923.1
F056010	O. batsensis HTCC2597	881	705.337	1.99714	1408.66	1408.66	1.13512	31.29	2	13	M	SEYTRDPDALSR	L		1	4	ZP_00998923.1
F056010	O. batsensis HTCC2597	215	542.266	1.99628	1082.52	1082.52	0.180136	33.86	118	126	R	YCINSASLR	F		0	2	ZP_00998923.1
F056010	O. batsensis HTCC2597	2020	897.445	1.99776	1792.88	1792.88	0.534337	68.58	6	21	R	AVLAGGCFWGMQDLIR	K		0	2	ZP_00998924.1
F056010	O. batsensis HTCC2597	3515	614.31	3.99344	2453.21	2453.21	0.709683	35.99	45	65	R	NHGTHAEGIEIIFDPDRITYR	Q		1	2	ZP_00998924.1
F056010	O. batsensis HTCC2597	271	561.781	1.99641	1121.55	1121.55	0.288887	30.99	83	92	R	QGNDIGLSYR	S		0	2	ZP_00998924.1
F056010	O. batsensis HTCC2597	1060	495.256	2.9939	1482.75	1482.75	-0.156466	26.46	31	44	R	VGYTGGDVPKATYR	N		1	2	ZP_00998924.1
F056010	O. batsensis HTCC2597	4024	725.102	3.99444	2896.38	2896.38	0.445384	32.02	102	126	R	DKLGIPLSDTYNQYLAYHDGHTGYR	R		1	2	ZP_00998937.1
F056010	O. batsensis HTCC2597	203	537.81	1.99625	1073.61	1073.61	0.640831	48.19	45	54	R	FALGIIPMGR	Q		0	2	ZP_00998937.1
F056010	O. batsensis HTCC2597	235	545.808	1.99631	1089.6	1089.6	0.705763	30.52	45	54	R	FALGIIPMGR	Q	Oxidation (M) [8]	0	2	ZP_00998937.1
F056010	O. batsensis HTCC2597	2472	978.402	1.99794	1954.79	1954.79	1.05229	77.94	84	99	R	NDFNDATDFMGWYMTK	T		0	2	ZP_00998937.1
F056010	O. batsensis HTCC2597	3027	1090.03	1.99815	2178.05	2178.04	1.78968	87.89	442	461	R	FLSNITDFGMDPQAAIDAPR	S		0	4	ZP_00998940.1
F056010	O. batsensis HTCC2597	3052	1098.03	1.99817	2194.04	2194.04	1.35777	95.55	442	461	R	FLSNITDFGMDPQAAIDAPR	S	Oxidation (M) [10]	0	1	ZP_00998940.1
F056010	O. batsensis HTCC2597	3547	619.824	3.9935	2475.27	2475.27	1.15866	16.11	481	504	R	QALADMGHRVTVPDEAIGGAQAIR	I		1	1	ZP_00998940.1
F056010	O. batsensis HTCC2597	833	463.225	2.99348	1386.65	1386.65	0.278368	28.84	462	473	R	SFAQADHLDVER	G		0	1	ZP_00998940.1
F056010	O. batsensis HTCC2597	2975	720.687	2.99581	2159.04	2159.04	0.373314	34.43	462	480	R	SFAQADHLDVERGYAPEVR	Q		1	2	ZP_00998940.1
F056010	O. batsensis HTCC2597	2496	654.994	2.99539	1961.96	1961.96	0.485739	25.5	423	441	R	VLMPFGVMGGAYQATGHAR	F		0	2	ZP_00998940.1
F056010	O. batsensis HTCC2597	1096	748.908	1.99731	1495.8	1495.8	1.8679	57.53	490	504	R	VTVPDEAIGGAQAIR	I		0	1	ZP_00998940.1
F056010	O. batsensis HTCC2597	4028	967.49	2.99688	2899.45	2899.45	-0.201418	23.8	24	52	K	VIDPSTEEPCAVISLGSSADVDKAVAAAK	A		1	2	ZP_00998948.1
F056010	O. batsensis HTCC2597	3621	839.421	2.9964	2515.24	2515.24	1.15337	31.32	107	130	K	ALDMLPADAYLPDGRTPADSATVR	S		1	2	ZP_00998949.1
F056010	O. batsensis HTCC2597	1176	763.881	1.99736	1525.75	1525.75	1.00541	61	141	153	K	VQLMMTYPMTVGR	N		0	1	ZP_00998949.1
F056010	O. batsensis HTCC2597	993	486.271	2.99379	1455.79	1455.79	-0.846274	29.56	120	132	K	QLLDLTTSHITSK	-		0	2	ZP_00998963.1
F056010	O. batsensis HTCC2597	3454	807.093	2.99626	2418.26	2418.25	1.06234	90.7	47	69	R	LGADEFLEVIAVDPAAPAPDRPR	W		0	2	ZP_00998964.1
F056010	O. batsensis HTCC2597	812	689.389	1.99708	1376.76	1376.77	-1.53185	29.47	99	111	R	LPEDLGPAIPVTR	G		0	1	ZP_00998964.1
F056010	O. batsensis HTCC2597	3721	859.434	2.99648	2575.28	2575.28	0.829814	48.58	23	46	R	ADKIGVPMCIAITDDAGNLVAFER	M		1	2	ZP_00998965.1
F056010	O. batsensis HTCC2597	3557	830.079	2.99636	2487.22	2487.21	0.383562	57.71	71	95	R	ATHEYGEASQPGKPAYGIASAIGGR	L		0	2	ZP_00998965.1
F056010	O. batsensis HTCC2597	3258	768.059	2.99607	2301.15	2301.15	0.890858	59.36	47	69	R	MDGGKVTSTTIAIDKSYTASGAK	R		2	2	ZP_00998965.1
F056010	O. batsensis HTCC2597	1113	501.277	2.99397	1500.81	1500.81	0.628994	30.46	1	13	-	MITVQRLDLADAR	V		1	3	ZP_00998965.1
F056010	O. batsensis HTCC2597	3801	661.837	3.99391	2643.32	2643.32	0.595086	45	70	95	K	RATHEYGEASQPGKPAYGIASAIGGR	L		1	2	ZP_00998965.1
F056010	O. batsensis HTCC2597	1145	759.394	1.99735	1516.77	1516.77	-0.146363	68.23	105	119	R	ITAATAEALGIDESR	V		0	2	ZP_00998971.1
F056010	O. batsensis HTCC2597	528	638.357	1.99684	1274.7	1274.7	0.427552	49.96	46	58	R	LAPGTSVAGVFTR	S		0	2	ZP_00998971.1
F056010	O. batsensis HTCC2597	3824	885.476	2.99659	2653.41	2653.4	2.20773	31.88	8	34	R	SPLAPASFPDLPVIAGVEFATAEAGVK	Y		0	2	ZP_00998971.1
F056010	O. batsensis HTCC2597	1328	788.915	1.99745	1575.82	1575.81	0.904294	47.89	97	110	R	LYPSSVPVSEELTR	R		0	2	ZP_00998990.1
F056010	O. batsensis HTCC2597	345	586.818	1.99657	1171.62	1171.62	0.817671	55.25	73	83	R	NGAILVDIDSR	A		0	2	ZP_00998990.1
F056010	O. batsensis HTCC2597	412	607.313	1.99668	1212.61	1212.61	1.15453	41.12	58	70	R	AAAGAGPVELDSR	L		0	2	ZP_00998991.1
F056010	O. batsensis HTCC2597	1622	832.418	1.99758	1662.82	1662.82	0.0865998	77.17	43	57	R	SSIPYDVQDAVNSLR	A		0	4	ZP_00998991.1
F056010	O. batsensis HTCC2597	3989	953.481	2.99683	2857.42	2857.42	0.727579	43.15	43	70	R	SSIPYDVQDAVNSLRAAAGAGPVELDSR	L		1	3	ZP_00998991.1
F056010	O. batsensis HTCC2597	159	515.812	1.99609	1029.61	1029.61	0.690554	32.28	34	42	K	VYRIPVGAR	S		1	4	ZP_00998991.1
F056010	O. batsensis HTCC2597	239	365.881	2.99174	1094.62	1094.62	-1.18762	48.11	57	67	R	IGLGFAPVGHK	Q		0	2	ZP_00998992.1
F056010	O. batsensis HTCC2597	1432	538.25	2.99439	1611.73	1611.73	0.0738338	17.39	68	81	K	QFEGDGRTPEGTYR	I		1	1	ZP_00998992.1
F056010	O. batsensis HTCC2597	1052	493.928	2.99388	1478.76	1478.76	0.0378695	43.38	114	127	K	SPGGDIFIHGLPNR	F		0	2	ZP_00998992.1
F056010	O. batsensis HTCC2597	1613	830.436	1.99757	1658.86	1658.86	0.766794	49.92	25	38	K	TYYGPEVTQVLVYK	A		0	2	ZP_00998992.1
F056010	O. batsensis HTCC2597	4217	1072.87	2.99718	3215.58	3215.57	0.825669	47.98	8	38	R	GSDLLLTHQSDPTPEFQLPGGGVDPGESPLR	A		0	2	ZP_00998998.1
F056010	O. batsensis HTCC2597	912	710.353	1.99716	1418.69	1418.69	0.846555	71.83	135	148	R	QVFLGGEQGNASGR	A		0	1	ZP_00999031.1
F056010	O. batsensis HTCC2597	3871	900.739	2.99665	2699.19	2699.19	0.667978	63.63	58	81	R	FPSVEAAVECYNSSDYQAALDHAR	G		0	2	ZP_00999042.1
F056010	O. batsensis HTCC2597	1206	768.864	1.99738	1535.71	1535.71	0.34707	33.96	82	95	R	GASERELMVVETSE	-		1	2	ZP_00999042.1
F056010	O. batsensis HTCC2597	1244	776.863	1.99741	1551.71	1551.71	2.07191	24.23	82	95	R	GASERELMVVETSE	-	Oxidation (M) [8]	1	1	ZP_00999042.1
F056010	O. batsensis HTCC2597	4224	810.635	3.99503	3238.51	3238.51	0.725334	16.86	53	81	R	NVVARFPSVEAAVECYNSSDYQAALDHAR	G		1	1	ZP_00999042.1
F056010	O. batsensis HTCC2597	2855	524.051	3.99231	2092.18	2092.18	0.390981	44.03	2	21	M	AGSVNKVIIVGNLGRDPEVR	S		2	2	ZP_00999046.1
F056010	O. batsensis HTCC2597	36	446.748	1.99549	891.481	891.481	0.0717906	28.54	67	73	R	IAEQYLR	K		0	2	ZP_00999046.1
F056010	O. batsensis HTCC2597	1424	536.63	2.99437	1606.87	1606.87	-0.542671	60.15	74	87	R	KGSKVYIEGQLETR	K		2	2	ZP_00999046.1
F056010	O. batsensis HTCC2597	1209	512.967	2.99411	1535.88	1535.88	1.30219	17.22	8	21	K	VIIVGNLGRDPEVR	S		1	2	ZP_00999046.1
F056010	O. batsensis HTCC2597	398	604.32	1.99667	1206.63	1206.62	1.00528	50.84	78	87	K	VYIEGQLETR	K		0	2	ZP_00999046.1
F056010	O. batsensis HTCC2597	2555	992.995	1.99797	1983.97	1983.97	-0.025706	90.39	156	174	R	AVALAESVDTLPDEGEVRN	-		1	2	ZP_00999048.1
F056010	O. batsensis HTCC2597	1698	563.635	2.99464	1687.88	1687.88	0.830627	22.76	90	105	R	KPASGTDLVADCTLLK	L		0	1	ZP_00999079.1
F056010	O. batsensis HTCC2597	3956	936.463	2.99677	2806.37	2806.36	1.49517	45.31	42	67	K	ATFTPNQDMGDNVIVINADKVQMTGK	K		1	2	ZP_00999081.1
F056010	O. batsensis HTCC2597	3967	941.794	2.99679	2822.36	2822.36	0.381596	30.68	42	67	K	ATFTPNQDMGDNVIVINADKVQMTGK	K	Oxidation (M) [23]	1	2	ZP_00999081.1
F056010	O. batsensis HTCC2597	3968	941.794	2.99679	2822.36	2822.36	1.23195	23.85	42	67	K	ATFTPNQDMGDNVIVINADKVQMTGK	K	Oxidation (M) [9]	1	1	ZP_00999081.1
F056010	O. batsensis HTCC2597	1252	518.273	2.99417	1551.8	1551.8	0.52262	39.85	1	14	-	MKTFSATPADIDKK	W		2	2	ZP_00999081.1
F056010	O. batsensis HTCC2597	1303	523.604	2.99423	1567.79	1567.79	-0.132671	22.87	1	14	-	MKTFSATPADIDKK	W	Oxidation (M) [1]	2	2	ZP_00999081.1
F056010	O. batsensis HTCC2597	866	702.861	1.99713	1403.71	1403.7	1.69551	61.7	88	100	R	TAGQILEGAYPER	V		0	2	ZP_00999081.1
F056010	O. batsensis HTCC2597	2813	691.716	2.99563	2072.13	2072.13	0.523617	22.72	88	107	R	TAGQILEGAYPERVVTAAVK	R		1	2	ZP_00999081.1
F056010	O. batsensis HTCC2597	3109	743.75	2.99594	2228.23	2228.23	-0.188491	28.99	88	108	R	TAGQILEGAYPERVVTAAVKR	M		2	3	ZP_00999081.1
F056010	O. batsensis HTCC2597	2988	721.356	2.99581	2161.05	2161.04	0.870413	60.28	125	144	R	VYAGADHPHEAQSPEVLDVK	S		0	4	ZP_00999081.1
F056010	O. batsensis HTCC2597	928	713.908	1.99718	1425.8	1425.8	1.8544	65.43	15	27	K	WIVIDAEGVVLGR	L		0	2	ZP_00999081.1
F056010	O. batsensis HTCC2597	902	472.566	2.99361	1414.68	1414.68	-1.23774	15.18	74	85	K	YYWHTGHPGGIK	H		0	1	ZP_00999081.1
F056010	O. batsensis HTCC2597	492	630.328	1.9968	1258.64	1258.64	0.310653	38.01	2	12	M	ADQINSLEELK	G		0	1	ZP_00999082.1
F056010	O. batsensis HTCC2597	352	588.325	1.99658	1174.64	1174.63	0.383098	31.7	122	131	K	ALQLYDPSLR	S		0	2	ZP_00999082.1
F056010	O. batsensis HTCC2597	2930	709.37	2.99574	2125.09	2125.08	1.91804	28.9	179	197	R	HSPFPPEDLLESGIGVYLR	G		0	2	ZP_00999083.1
F056010	O. batsensis HTCC2597	1350	791.898	1.99746	1581.78	1581.78	1.7455	72.75	339	353	R	ASGAWLSLAESAYTR	Q		0	2	ZP_00999101.1
F056010	O. batsensis HTCC2597	228	544.294	1.9963	1086.57	1086.57	-0.0717852	56.48	178	188	R	MPGLGGEVLSK	M		0	2	ZP_00999101.1
F056010	O. batsensis HTCC2597	1568	549.923	2.9945	1646.75	1646.75	0.0431153	24.26	1	15	-	MTPATATAYQGQDHR	H		0	2	ZP_00999106.1
F056010	O. batsensis HTCC2597	2502	984.969	1.99795	1967.92	1967.92	0.105695	42.92	103	117	R	RLEEEQEQFESFLER	L		1	3	ZP_00999106.1
F056010	O. batsensis HTCC2597	1883	582.948	2.99482	1745.82	1745.82	0.773847	30.68	87	102	K	SSGNTAFDAYKSETLR	R		1	2	ZP_00999106.1
F056010	O. batsensis HTCC2597	1375	530.279	2.9943	1587.82	1587.82	0.561148	30.79	89	102	R	GFRPQPSDLPFTAR	I		0	2	ZP_00999110.1
F056010	O. batsensis HTCC2597	2401	964.509	1.99791	1927	1927	0.723923	52.66	2	19	M	TDTASETNLLQPGQLIAR	G		0	1	ZP_00999114.1
F056010	O. batsensis HTCC2597	1934	589.305	2.99487	1764.89	1764.89	-0.196612	41.04	69	83	R	RLIVGKTDQGTDCFR	W		2	2	ZP_00999121.1
F056010	O. batsensis HTCC2597	570	645.327	1.99688	1288.64	1288.64	-0.563384	34.14	17	28	R	TASEFSQHVVGK	T		0	2	ZP_00999121.1
F056010	O. batsensis HTCC2597	526	638.351	1.99684	1274.69	1274.69	-0.0196127	63.65	29	40	K	TVDGPGYQVVIK	A		0	2	ZP_00999121.1
F056010	O. batsensis HTCC2597	824	691.852	1.99709	1381.69	1381.69	0.754874	61.67	84	96	R	WAVDGSTFTLTGK	N		0	2	ZP_00999121.1
F056010	O. batsensis HTCC2597	2030	899.922	1.99776	1797.83	1797.83	-0.799296	33.52	78	95	K	LSVDGDMGKAMSLGSMLS	-		1	1	ZP_00999125.1
F056010	O. batsensis HTCC2597	995	486.276	2.99379	1455.81	1455.8	0.527543	24.86	2	15	M	SEVINGAVAALREK	M		1	1	ZP_00999125.1
F056010	O. batsensis HTCC2597	1020	735.841	1.99726	1469.67	1469.66	1.47789	66.84	2	13	M	TYIVNDNCIACK	Y		0	2	ZP_00999129.1
F056010	O. batsensis HTCC2597	114	491.771	1.9959	981.528	981.528	-0.120221	18.84	19	28	R	AFYGGVLGAK	E		0	1	ZP_00999138.1
F056010	O. batsensis HTCC2597	2373	960.476	1.9979	1918.94	1918.93	1.58004	35.42	66	82	R	ADLSAIEEPVDMVDIFR	R		0	2	ZP_00999145.1
F056010	O. batsensis HTCC2597	767	680.378	1.99704	1358.74	1358.74	0.532846	89.54	2	14	M	SILDDLATTIAAR	R		0	2	ZP_00999147.1
F056010	O. batsensis HTCC2597	1263	777.847	1.99741	1553.68	1553.68	0.87148	50.28	41	54	R	IAPCGPAYCGTMTR	T		0	2	ZP_00999152.1
F056010	O. batsensis HTCC2597	1304	785.845	1.99744	1569.68	1569.67	1.04162	43.88	41	54	R	IAPCGPAYCGTMTR	T	Oxidation (M) [12]	0	2	ZP_00999152.1
F056010	O. batsensis HTCC2597	1594	828.898	1.99757	1655.78	1655.78	0.814722	84.4	55	69	R	TFNSDGEYKSPNLGK	Q		1	3	ZP_00999152.1
F056010	O. batsensis HTCC2597	3166	755.764	2.996	2264.27	2264.27	0.777293	20.38	105	125	R	AALDLSGRPFLVWNVALPTPK	I		0	1	ZP_00999154.1
F056010	O. batsensis HTCC2597	4332	709.548	4.9929	3542.7	3542.7	1.1734	22.75	55	86	R	CKGDLHIDDHHTVEDCGIAIGQALTQALGDKR	G		2	1	ZP_00999154.1
F056010	O. batsensis HTCC2597	219	543.274	1.99629	1084.53	1084.53	-0.807721	37.13	46	54	R	HSLIDMDVR	C		0	2	ZP_00999154.1
F056010	O. batsensis HTCC2597	1431	805.39	1.9975	1608.77	1608.76	1.278	44.63	91	104	R	YGSCLLPMDDALVR	A		0	2	ZP_00999154.1
F056010	O. batsensis HTCC2597	2908	706.006	2.99572	2115	2114.99	1.1792	41.8	16	36	K	GGSGMVSTESGALDKQPYGFK	Q		1	2	ZP_00999161.1
F056010	O. batsensis HTCC2597	621	435.919	2.99307	1304.74	1304.73	0.915129	41.64	129	140	K	LFKGAEITLDAK	L		1	2	ZP_00999161.1
F056010	O. batsensis HTCC2597	1517	546.638	2.99447	1636.89	1636.89	0.818015	32.81	2	17	M	AGPAAAESLTIRPVER	A		0	2	ZP_00999168.1
F056010	O. batsensis HTCC2597	218	542.785	1.99629	1083.56	1083.56	0.016612	45.4	70	79	K	TGEEVPISPR	R		0	2	ZP_00999188.1
F056010	O. batsensis HTCC2597	1826	579.32	2.99478	1734.94	1734.94	0.117583	28.9	64	79	R	VGRNPKTGEEVPISPR	R		2	2	ZP_00999188.1
F056010	O. batsensis HTCC2597	3359	786.053	2.99616	2355.14	2355.13	1.22923	29.23	20	40	R	AHGYVPEEEDLQQITVGVDTR	D		0	1	ZP_00999193.1
F056010	O. batsensis HTCC2597	3747	1303.62	1.99845	2605.22	2605.22	1.15844	112.09	41	65	R	DTVAEVLGAPSTSGVTDDSGYFYVR	S		0	4	ZP_00999193.1
F056010	O. batsensis HTCC2597	1173	761.892	1.99736	1521.77	1521.77	1.00607	43.95	82	95	R	EIVAVTFDDTGTVR	N		0	1	ZP_00999193.1
F056010	O. batsensis HTCC2597	670	441.221	2.99315	1320.64	1320.64	0.132511	23.36	96	106	R	NIERYGLEDGR	A		1	1	ZP_00999193.1
F056010	O. batsensis HTCC2597	2455	487.516	3.99174	1946.03	1946.03	-0.0226101	20.15	96	112	R	NIERYGLEDGRAVVLSR	R		2	1	ZP_00999193.1
F056010	O. batsensis HTCC2597	456	620.802	1.99675	1239.59	1239.59	0.688938	71.3	131	142	R	NIGNFSAGSFLN	-		0	2	ZP_00999193.1
F056010	O. batsensis HTCC2597	2176	620.009	2.99513	1857.01	1857.01	-0.564888	31.01	113	130	R	RVTTNDSGGSGILAQLLR	N		1	2	ZP_00999193.1
F056010	O. batsensis HTCC2597	1739	851.46	1.99763	1700.91	1700.91	0.312775	82.86	114	130	R	VTTNDSGGSGILAQLLR	N		0	2	ZP_00999193.1
F056010	O. batsensis HTCC2597	2644	669.357	2.99549	2005.05	2005.05	1.00845	35.32	78	95	K	VVEREIVAVTFDDTGTVR	N		1	2	ZP_00999193.1
F056010	O. batsensis HTCC2597	4343	1192.58	2.99747	3574.71	3574.71	1.62587	60.14	47	80	R	LFSLEPQDIDADGLGAYTVSHDAGVETEAQGLTR	L		0	2	ZP_00999203.1
F056010	O. batsensis HTCC2597	1131	758.401	1.99734	1514.79	1514.79	-0.20729	46.8	81	93	R	LGPFLWLNDDGLR	M		0	2	ZP_00999203.1
F056010	O. batsensis HTCC2597	1694	562.648	2.99463	1684.92	1684.92	1.46832	18.87	94	108	R	MTLTLTTEHTAVLVR	Q		0	1	ZP_00999203.1
F056010	O. batsensis HTCC2597	3522	820.729	2.99632	2459.16	2459.16	0.17201	35.27	109	129	R	QVPNDQRPSAEIDILECEVTF	-		0	4	ZP_00999203.1
F056010	O. batsensis HTCC2597	3043	730.359	2.99586	2188.05	2188.05	-0.124768	57.94	69	90	K	VTPVRADSTCVDAGAATAAAER	L		1	2	ZP_00999206.1
F056010	O. batsensis HTCC2597	2450	648.982	2.99534	1943.92	1943.92	1.17649	40.04	54	70	R	EVVKSDFEEAGHEDVVR	K		1	2	ZP_00999208.1
F056010	O. batsensis HTCC2597	1809	577.967	2.99477	1730.88	1730.88	-0.237451	38.27	71	86	R	KVSGDLGDKATDQEIR	T		2	2	ZP_00999208.1
F056010	O. batsensis HTCC2597	609	651.369	1.99691	1300.72	1300.72	1.34541	63.26	32	43	K	LLGLWAAELMGK	T		0	2	ZP_00999208.1
F056010	O. batsensis HTCC2597	1406	535.269	2.99435	1602.79	1602.78	0.714382	44.72	72	86	K	VSGDLGDKATDQEIR	T		1	1	ZP_00999208.1
F056010	O. batsensis HTCC2597	1386	797.423	1.99747	1592.83	1592.83	0.694362	38.85	62	76	K	LLANTVIESYSVDLG	-		0	2	ZP_00999210.1
F056010	O. batsensis HTCC2597	3493	814.7	2.99629	2441.08	2441.08	1.00488	31.63	41	61	K	VIEMDLADGTTEETVRDMCEK	L		1	1	ZP_00999210.1
F056010	O. batsensis HTCC2597	4385	1243.58	2.99757	3727.72	3727.72	1.23507	58.35	105	140	R	AEFAESVGENSVHGSDAPETAAQEIAYFFSGLELVG	-		0	2	ZP_00999231.1
F056010	O. batsensis HTCC2597	4308	1138.22	2.99735	3411.64	3411.64	1.32312	38.62	56	85	K	ERPFYDELCEFMASEPVVVQVLEGEGAIAK	N		0	2	ZP_00999231.1
F056010	O. batsensis HTCC2597	1645	835.913	1.99759	1669.81	1669.81	0.892916	113.28	88	104	R	EVMGATNPADAAPGTIR	A		0	2	ZP_00999231.1
F056010	O. batsensis HTCC2597	466	416.563	2.99275	1246.67	1246.67	-0.0593583	48.81	23	33	K	INAKFEEAGLR	I		1	3	ZP_00999231.1
F056010	O. batsensis HTCC2597	1506	545.623	2.99446	1633.85	1633.85	0.295009	23.83	42	55	K	LSKEQAGVFYEVHK	E		1	1	ZP_00999231.1
F056010	O. batsensis HTCC2597	1921	880.987	1.99771	1759.96	1759.96	0.914795	75.22	18	33	R	NLTGKINAKFEEAGLR	I		2	2	ZP_00999231.1
F056010	O. batsensis HTCC2597	2433	647.659	2.99533	1939.96	1939.95	0.921672	40.4	86	104	K	NREVMGATNPADAAPGTIR	A		1	2	ZP_00999231.1
F056010	O. batsensis HTCC2597	2477	652.99	2.99537	1955.95	1955.95	0.699916	34.43	86	104	K	NREVMGATNPADAAPGTIR	A	Oxidation (M) [5]	1	2	ZP_00999231.1
F056010	O. batsensis HTCC2597	416	607.859	1.99669	1213.7	1213.7	1.01343	29.31	6	16	R	TLSIIKPDATR	R		0	3	ZP_00999231.1
F056010	O. batsensis HTCC2597	789	685.909	1.99706	1369.8	1369.8	-0.0547524	30.91	6	17	R	TLSIIKPDATRR	N		1	4	ZP_00999231.1
F056010	O. batsensis HTCC2597	3835	668.59	3.99397	2670.33	2670.33	1.05418	28.39	233	259	R	HAPGTVGSESTTVHCIGGAHGTAVLVR	N		0	2	ZP_00999239.1
F056010	O. batsensis HTCC2597	255	555.766	1.99638	1109.52	1109.52	0.118069	22.47	100	108	R	ACVEAEYLR	R		0	1	ZP_00999240.1
F056010	O. batsensis HTCC2597	508	422.88	2.99285	1265.62	1265.62	-0.118519	15.24	100	109	R	ACVEAEYLRR	E		1	1	ZP_00999240.1
F056010	O. batsensis HTCC2597	1140	506.258	2.99403	1515.75	1515.75	0.124031	38.67	66	79	R	GLDTGAKEVEDNLR	A		1	2	ZP_00999240.1
F056010	O. batsensis HTCC2597	2529	658.34	2.99541	1972	1972	0.563895	52.46	66	83	R	GLDTGAKEVEDNLRATQR	G		2	2	ZP_00999240.1
F056010	O. batsensis HTCC2597	1063	495.577	2.9939	1483.71	1483.71	-0.236569	23.83	188	199	R	IRDIYGETTTCR	F		1	2	ZP_00999240.1
F056010	O. batsensis HTCC2597	1719	565.97	2.99466	1694.89	1694.89	0.500328	35.53	136	150	R	SLTVYEFATELPAVR	V		0	1	ZP_00999240.1
F056010	O. batsensis HTCC2597	337	583.83	1.99655	1165.65	1165.65	0.634841	61.59	113	126	K	AAVGASALGAPGPK	V		0	2	ZP_00999273.1
F056010	O. batsensis HTCC2597	4327	880.688	3.99543	3518.72	3518.72	0.879013	16.2	127	160	K	VTMTNKTEEAELAAEVHNAAPEATAEAAPKAEPK	K		2	2	ZP_00999273.1
F056010	O. batsensis HTCC2597	1565	549.628	2.9945	1645.86	1645.86	0.352399	25.61	25	39	K	KYGGEAVIPGNIICR	Q		1	3	ZP_00999274.1
F056010	O. batsensis HTCC2597	1157	759.891	1.99735	1517.77	1517.77	1.06143	36.19	26	39	K	YGGEAVIPGNIICR	Q		0	2	ZP_00999274.1
F056010	O. batsensis HTCC2597	871	703.357	1.99714	1404.7	1404.7	0.0783086	42.82	24	36	R	TAGNFETAPTIQR	N		0	2	ZP_00999305.1
F056010	O. batsensis HTCC2597	2069	912.935	1.99779	1823.86	1823.85	1.06039	91.52	57	75	K	GTTDYDAEAASAAAGNLVK	L		0	4	ZP_00999315.1
F056010	O. batsensis HTCC2597	3600	1254.61	1.99839	2507.2	2507.19	1.83751	89.71	76	98	K	LSTQDQTAYWLPGTAQGEIEGSR	A		0	4	ZP_00999315.1
F056010	O. batsensis HTCC2597	2785	1035.53	1.99805	2069.04	2069.04	-1.12564	95	38	56	R	QATMQLYAFNLGVLGNMAK	G		0	4	ZP_00999315.1
F056010	O. batsensis HTCC2597	2843	696.02	2.99566	2085.04	2085.04	0.324215	44.3	38	56	R	QATMQLYAFNLGVLGNMAK	G	Oxidation (M) [17]	0	2	ZP_00999315.1
F056010	O. batsensis HTCC2597	2847	1043.53	1.99807	2085.04	2085.04	2.27909	82.33	38	56	R	QATMQLYAFNLGVLGNMAK	G	Oxidation (M) [4]	0	4	ZP_00999315.1
F056010	O. batsensis HTCC2597	729	673.343	1.99701	1344.67	1344.67	0.533216	27.92	2	13	M	SVTPEALLEACR	T		0	1	ZP_00999320.1
F056010	O. batsensis HTCC2597	1685	561.947	2.99462	1682.82	1682.82	-0.423694	30.18	111	125	R	GFDRVSLPYCSGAVR	N		1	1	ZP_00999328.1
F056010	O. batsensis HTCC2597	302	572.811	1.99648	1143.61	1143.61	0.194997	56.77	139	148	R	LTGQSCIIPR	G		0	2	ZP_00999328.1
F056010	O. batsensis HTCC2597	443	616.891	1.99673	1231.77	1231.77	1.3022	19.78	57	68	R	TILVPGPIVPAR	K		0	1	ZP_00999328.1
F056010	O. batsensis HTCC2597	3191	1137.04	1.99823	2272.07	2272.07	1.46034	75.42	59	79	K	HAISTIMPAQPISLYEGEDSN	-		0	4	ZP_00999331.1
F056010	O. batsensis HTCC2597	4331	884.479	3.99544	3533.89	3533.88	1.78501	19.54	59	92	R	DTEDNRTPIAQITGLTVERLPGGAIVQVTGVSAR	Q		2	1	ZP_00999344.1
F056010	O. batsensis HTCC2597	3209	760.38	2.99603	2278.12	2278.11	1.58903	24.51	26	45	R	INPFNWFGRAEATEIEGTAR	N		1	2	ZP_00999344.1
F056010	O. batsensis HTCC2597	3423	799.413	2.99622	2395.22	2395.21	2.04199	63.67	93	114	R	QGAYNVALEPVEGVEVPPDTRR	Y		1	2	ZP_00999344.1
F056010	O. batsensis HTCC2597	172	522.296	1.99614	1042.58	1042.58	-0.0671413	23.28	123	132	R	VNPVGTTLSR	T		0	2	ZP_00999344.1
F056010	O. batsensis HTCC2597	86	482.267	1.99582	962.519	962.519	0.128829	28.84	115	122	R	YVLVADQR	V		0	1	ZP_00999344.1
F056010	O. batsensis HTCC2597	2571	663.37	2.99544	1987.09	1987.09	1.25259	38.55	115	132	R	YVLVADQRVNPVGTTLSR	T		1	2	ZP_00999344.1
F056010	O. batsensis HTCC2597	3760	874.103	2.99654	2619.29	2619.29	1.05105	17.8	121	143	R	DRETLDQLTATLMPEALDFDAVR	F		1	1	ZP_00999346.1
F056010	O. batsensis HTCC2597	3849	895.103	2.99662	2682.29	2682.29	0.430976	36.02	54	78	R	IGQGSNVQENTVMHTDIGCPLTVGR	N		0	2	ZP_00999355.1
F056010	O. batsensis HTCC2597	906	708.88	1.99716	1415.74	1415.74	0.293838	62.09	114	127	R	NCLIGAGALITEGK	E		0	1	ZP_00999355.1
F056010	O. batsensis HTCC2597	3979	947.824	2.99681	2840.45	2840.44	2.84428	27.91	114	141	R	NCLIGAGALITEGKEIPDNSMVLGSPGK	V		1	1	ZP_00999355.1
F056010	O. batsensis HTCC2597	878	704.931	1.99714	1407.85	1407.84	1.65004	36.82	127	139	K	SLVLVIPAEQARI	-		1	2	ZP_00999380.1
F056010	O. batsensis HTCC2597	2950	715.387	2.99578	2143.14	2143.14	0.724638	51.12	151	172	R	SGLFSLAEPIRGEGASAIAAAR	T		1	2	ZP_00999389.1
F056010	O. batsensis HTCC2597	970	723.402	1.99722	1444.79	1444.79	0.764126	67.31	173	185	R	TAVTKDLAEQITR	S		1	4	ZP_00999389.1
F056010	O. batsensis HTCC2597	1186	765.895	1.99737	1529.77	1529.77	1.37014	43.29	25	38	R	YATGAPVVEEELPR	I		0	2	ZP_00999389.1
F056010	O. batsensis HTCC2597	3686	849.759	2.99644	2546.25	2546.25	0.600883	45.02	92	115	R	ALEAAGEKTDENSALIEGVELTMR	E		1	1	ZP_00999390.1
F056010	O. batsensis HTCC2597	809	689.363	1.99708	1376.71	1376.71	-0.247692	16.17	81	91	R	DLLPIYDNMKR	A		1	1	ZP_00999390.1
F056010	O. batsensis HTCC2597	583	647.342	1.99689	1292.67	1292.67	-1.52862	35.08	69	80	R	EAELYGGSKLAR	D		1	3	ZP_00999390.1
F056010	O. batsensis HTCC2597	4296	848.405	3.99525	3389.59	3389.58	2.59442	19.02	124	154	K	HGMEPISPEVGDRFDPNVHEAMFEAPVPGTK	A		1	1	ZP_00999390.1
F056010	O. batsensis HTCC2597	1057	741.918	1.99728	1481.82	1481.82	0.848956	29.45	172	186	R	LLRPAQVGVSSTPAS	-		0	2	ZP_00999390.1
F056010	O. batsensis HTCC2597	1064	743.363	1.99729	1484.71	1484.71	0.808238	62.88	2	16	M	AESENGAAEAAPQIK	M		0	2	ZP_00999408.1
F056010	O. batsensis HTCC2597	3032	1090.05	1.99815	2178.08	2178.07	0.403108	59.62	129	147	R	DGGFPPLNLDNIDFVNLYR	T		0	2	ZP_00999408.1
F056010	O. batsensis HTCC2597	44	455.255	1.99557	908.495	908.494	0.89819	18.42	114	120	R	MIFPFVR	R		0	2	ZP_00999408.1
F056010	O. batsensis HTCC2597	294	569.308	1.99646	1136.6	1136.6	0.938764	46.23	17	25	K	MNILSQYIR	D		0	1	ZP_00999408.1
F056010	O. batsensis HTCC2597	1364	529.617	2.99429	1585.83	1585.83	-0.26989	16.5	148	162	R	ALIDTDAAAEEIARK	S		1	1	ZP_00999414.1
F056010	O. batsensis HTCC2597	24	424.213	1.99525	846.412	846.412	-0.307179	39.96	100	106	K	AWIEESI	-		0	1	ZP_00999416.1
F056010	O. batsensis HTCC2597	2254	938.521	1.99785	1875.03	1875.03	1.40105	101.18	73	89	R	GIPALFIFKDGEVISNR	A		1	7	ZP_00999416.1
F056010	O. batsensis HTCC2597	2752	1027.54	1.99804	2053.07	2053.06	1.37648	73.52	54	72	K	IAKVDVDSNPNTPMQLGVR	G		1	4	ZP_00999416.1
F056010	O. batsensis HTCC2597	2790	690.694	2.99562	2069.06	2069.06	1.1266	32.71	54	72	K	IAKVDVDSNPNTPMQLGVR	G	Oxidation (M) [14]	1	2	ZP_00999416.1
F056010	O. batsensis HTCC2597	1958	888.44	1.99773	1774.86	1774.86	1.22545	41.2	36	51	K	QIGPALEELSEEFGEK	L		0	2	ZP_00999416.1
F056010	O. batsensis HTCC2597	2663	673.021	2.99551	2016.04	2016.04	0.586793	36.13	36	53	K	QIGPALEELSEEFGEKLK	I		1	6	ZP_00999416.1
F056010	O. batsensis HTCC2597	1476	814.388	1.99753	1626.76	1626.76	-0.153065	77.74	2	16	M	TTVAVTDDTFDSEVK	N		0	2	ZP_00999416.1
F056010	O. batsensis HTCC2597	1861	871.432	1.99769	1740.85	1740.85	1.46538	54.89	57	72	K	VDVDSNPNTPMQLGVR	G		0	2	ZP_00999416.1
F056010	O. batsensis HTCC2597	1779	573.013	2.99473	1716.02	1716.02	-0.456289	19.14	85	102	R	IVVLTGYGAIATAVAAVK	I		0	1	ZP_00999425.1
F056010	O. batsensis HTCC2597	3953	935.139	2.99677	2802.39	2802.39	0.595563	43.37	2	25	M	SEELDLGEDRSLLLVDDDEPFLKR	L		2	1	ZP_00999425.1
F056010	O. batsensis HTCC2597	819	691.312	1.99709	1380.61	1380.61	0.216571	51.02	19	30	K	CGMTPDMDLLTK	V		0	2	ZP_00999429.1
F056010	O. batsensis HTCC2597	853	699.309	1.99712	1396.6	1396.6	0.558498	63.5	19	30	K	CGMTPDMDLLTK	V	Oxidation (M) [3]	0	2	ZP_00999429.1
F056010	O. batsensis HTCC2597	901	707.307	1.99715	1412.6	1412.6	0.467932	47.99	19	30	K	CGMTPDMDLLTK	V	Oxidation (M) [3], Oxidation (M) [7]	0	2	ZP_00999429.1
F056010	O. batsensis HTCC2597	3921	918.127	2.99671	2751.36	2751.36	1.18305	45.68	66	91	K	KLGLADSPDLMAGINSVIETYGMSNR	N		1	2	ZP_00999429.1
F056010	O. batsensis HTCC2597	3935	923.459	2.99673	2767.35	2767.35	1.02481	30.47	66	91	K	KLGLADSPDLMAGINSVIETYGMSNR	N	Oxidation (M) [11]	1	1	ZP_00999429.1
F056010	O. batsensis HTCC2597	3765	1312.64	1.99847	2623.27	2623.26	2.01543	94.61	67	91	K	LGLADSPDLMAGINSVIETYGMSNR	N		0	4	ZP_00999429.1
F056010	O. batsensis HTCC2597	3994	956.141	2.99684	2865.4	2865.4	0.395058	42.24	67	93	K	LGLADSPDLMAGINSVIETYGMSNRNK	Y		1	2	ZP_00999429.1
F056010	O. batsensis HTCC2597	3792	880.761	2.99657	2639.26	2639.26	1.43677	31.24	67	91	K	LGLADSPDLMAGINSVIETYGMSNR	N	Oxidation (M) [10]	0	2	ZP_00999429.1
F056010	O. batsensis HTCC2597	3790	1320.64	1.99847	2639.26	2639.26	0.897222	69.12	67	91	K	LGLADSPDLMAGINSVIETYGMSNR	N	Oxidation (M) [22]	0	3	ZP_00999429.1
F056010	O. batsensis HTCC2597	4390	1248.27	2.99758	3741.79	3741.78	2.62228	78.44	31	65	K	VTIGCGPSIYDDDASTVAASQPGELETVKENFLMK	K		1	4	ZP_00999429.1
F056010	O. batsensis HTCC2597	4425	1290.96	2.99766	3869.87	3869.87	0.738009	61.63	31	66	K	VTIGCGPSIYDDDASTVAASQPGELETVKENFLMKK	L		2	5	ZP_00999429.1
F056010	O. batsensis HTCC2597	4435	1296.3	2.99767	3885.87	3885.87	1.78545	43.66	31	66	K	VTIGCGPSIYDDDASTVAASQPGELETVKENFLMKK	L	Oxidation (M) [34]	2	4	ZP_00999429.1
F056010	O. batsensis HTCC2597	4399	1253.6	2.99759	3757.78	3757.77	2.10045	95.54	31	65	K	VTIGCGPSIYDDDASTVAASQPGELETVKENFLMK	K	Oxidation (M) [34]	1	4	ZP_00999429.1
F056010	O. batsensis HTCC2597	3340	782.034	2.99614	2343.08	2343.08	0.740905	43.11	11	30	K	YAEDLKDKCGMTPDMDLLTK	V		2	2	ZP_00999429.1
F056010	O. batsensis HTCC2597	3369	787.366	2.99616	2359.08	2359.07	1.19454	48.79	11	30	K	YAEDLKDKCGMTPDMDLLTK	V	Oxidation (M) [11]	2	2	ZP_00999429.1
F056010	O. batsensis HTCC2597	3397	792.697	2.99619	2375.07	2375.07	0.252203	31.68	11	30	K	YAEDLKDKCGMTPDMDLLTK	V	Oxidation (M) [11], Oxidation (M) [15]	2	2	ZP_00999429.1
F056010	O. batsensis HTCC2597	3368	787.366	2.99616	2359.08	2359.07	1.19454	38.81	11	30	K	YAEDLKDKCGMTPDMDLLTK	V	Oxidation (M) [15]	2	3	ZP_00999429.1
F056010	O. batsensis HTCC2597	1415	803.957	1.99749	1605.9	1605.9	0.415344	24.21	88	102	R	AVEPVPTPVTLDQIK	A		0	1	ZP_00999431.1
F056010	O. batsensis HTCC2597	2284	628.999	2.9952	1883.97	1883.97	-0.692154	24.43	1	17	-	MLFALMAHDKPGALDVR	N		0	2	ZP_00999432.1
F056010	O. batsensis HTCC2597	802	686.396	1.99707	1370.78	1370.78	1.10594	87.39	8	20	R	VSLITLGVADLDR	S		0	2	ZP_00999462.1
F056010	O. batsensis HTCC2597	3919	914.809	2.9967	2741.4	2741.4	1.04107	28.93	34	60	R	KVEEAIASGDKSAASAALQAAQPELMR	G		2	3	ZP_00999466.1
F056010	O. batsensis HTCC2597	3924	690.358	3.99416	2757.4	2757.4	1.8347	36.93	34	60	R	KVEEAIASGDKSAASAALQAAQPELMR	G	Oxidation (M) [26]	2	2	ZP_00999466.1
F056010	O. batsensis HTCC2597	1440	807.917	1.99751	1613.82	1613.82	-0.0254056	50.4	45	60	K	SAASAALQAAQPELMR	G		0	3	ZP_00999466.1
F056010	O. batsensis HTCC2597	280	565.794	1.99644	1129.57	1129.57	0.77817	50	80	91	R	AAGDVGLTVDGR	E		0	2	ZP_00999482.1
F056010	O. batsensis HTCC2597	1816	867.928	1.99768	1733.84	1733.84	0.343746	65.32	39	53	K	DPGQNGILMYLTQER	S		0	2	ZP_00999482.1
F056010	O. batsensis HTCC2597	632	654.838	1.99692	1307.66	1307.66	-0.139944	27.72	92	102	R	EFRVPAEFTGR	T		1	3	ZP_00999482.1
F056010	O. batsensis HTCC2597	2063	607.327	2.99502	1818.96	1818.96	0.689955	32.42	141	158	R	IEGHTLPVDLSGAGQAVR	E		0	2	ZP_00999482.1
F056010	O. batsensis HTCC2597	3868	675.34	3.99403	2697.33	2697.33	-0.144217	28.06	141	165	R	IEGHTLPVDLSGAGQAVREQAAYCR	-		1	2	ZP_00999482.1
F056010	O. batsensis HTCC2597	3079	555.804	3.99275	2219.19	2219.18	0.735405	46.72	138	158	R	MLRIEGHTLPVDLSGAGQAVR	E		1	4	ZP_00999482.1
F056010	O. batsensis HTCC2597	246	550.772	1.99634	1099.53	1099.53	-0.138241	53.23	54	63	R	SAAGEYFSIR	C		0	2	ZP_00999482.1
F056010	O. batsensis HTCC2597	3374	788.4	2.99617	2362.18	2362.17	1.27933	26.22	34	53	K	WVQSKDPGQNGILMYLTQER	S		1	1	ZP_00999482.1
F056010	O. batsensis HTCC2597	3944	926.457	2.99674	2776.35	2776.35	0.303996	53.69	21	44	R	FYDLNKSPIVSPYTGEIVEFDESK	N		1	2	ZP_00999489.1
F056010	O. batsensis HTCC2597	4132	1016.5	2.99703	3046.49	3046.49	-0.716562	52.43	21	46	R	FYDLNKSPIVSPYTGEIVEFDESKNR	M		2	3	ZP_00999489.1
F056010	O. batsensis HTCC2597	469	624.802	1.99678	1247.59	1247.59	0.296572	45.19	383	396	R	EPSGGFAVGASGGR	K		0	2	ZP_00999504.1
F056010	O. batsensis HTCC2597	1726	850.439	1.99763	1698.86	1698.86	1.29204	70.37	425	440	R	IDCSGEVLIADAALPR	E		0	2	ZP_00999504.1
F056010	O. batsensis HTCC2597	3115	1118.49	1.9982	2234.96	2234.96	0.992413	69.81	477	496	R	NAGCTEVMSPWADALREDDV	-		1	2	ZP_00999504.1
F056010	O. batsensis HTCC2597	2095	610.963	2.99505	1829.87	1829.87	0.178155	35.4	39	54	R	FAQGDDQSPPTRDQLR	A		1	2	ZP_00999507.1
F056010	O. batsensis HTCC2597	1649	837.928	1.9976	1673.84	1673.84	1.06342	97.28	116	132	R	GLGNDLMSADVSGVLAR	I		0	2	ZP_00999507.1
F056010	O. batsensis HTCC2597	2157	616.661	2.9951	1846.96	1846.96	0.190042	18.6	78	94	R	VPVSSILTMFAQNGEVR	T		0	1	ZP_00999507.1
F056010	O. batsensis HTCC2597	2077	609.314	2.99504	1824.92	1824.92	0.0120553	15.56	1	15	-	MKKDTHPDYHVIDVK	M		2	1	ZP_00999523.1
F056010	O. batsensis HTCC2597	291	569.274	1.99646	1136.53	1136.53	0.54376	74.03	16	25	K	MTDGTVVQMR	S		0	2	ZP_00999523.1
F056010	O. batsensis HTCC2597	29	435.229	1.99537	868.444	868.444	0.181935	27.04	66	73	K	NKYAGLGF	-		1	1	ZP_00999523.1
F056010	O. batsensis HTCC2597	1491	816.461	1.99753	1630.91	1630.9	1.49794	32.64	113	127	R	IAEVTNYKPKAQAKA	-		2	3	ZP_00999524.1
F056010	O. batsensis HTCC2597	267	561.301	1.99641	1120.59	1120.59	-0.190971	46.96	66	75	R	KISFGEGVER	V		1	4	ZP_00999524.1
F056010	O. batsensis HTCC2597	2233	936.495	1.99785	1870.97	1870.97	1.96957	89.5	1	17	-	MDLIAQLEAEQIAELGK	D		0	2	ZP_00999524.1
F056010	O. batsensis HTCC2597	4212	800.918	3.99497	3199.64	3199.64	0.207211	18.33	1	29	-	MDLIAQLEAEQIAELGKDIPDFKAGDTIR	V		2	1	ZP_00999524.1
F056010	O. batsensis HTCC2597	1641	556.295	2.99457	1665.86	1665.86	1.0271	31.51	40	53	R	TRVQAYEGVCISRK	N		2	2	ZP_00999524.1
F056010	O. batsensis HTCC2597	2201	933.506	1.99784	1865	1864.99	2.14156	78.15	76	91	R	VFPLYSTNIESIEVVR	R		0	3	ZP_00999524.1
F056010	O. batsensis HTCC2597	540	641.317	1.99686	1280.62	1280.62	0.570818	50.53	42	52	R	VQAYEGVCISR	K		0	2	ZP_00999524.1
F056010	O. batsensis HTCC2597	887	470.578	2.99358	1408.71	1408.71	-0.354934	22.07	42	53	R	VQAYEGVCISRK	N		1	1	ZP_00999524.1
F056010	O. batsensis HTCC2597	2524	986.426	1.99796	1970.84	1970.83	1.53133	135.6	111	131	K	AAEAAEADAAPAEEAAAENAE	-		0	3	ZP_00999528.1
F056010	O. batsensis HTCC2597	3127	1121.51	1.9982	2241.01	2241	1.89379	116.19	108	131	R	AAKAAEAAEADAAPAEEAAAENAE	-		1	4	ZP_00999528.1
F056010	O. batsensis HTCC2597	765	453.234	2.99333	1356.68	1356.68	0.713507	28.94	61	72	K	AWLDKGAQPTDR	V		1	1	ZP_00999528.1
F056010	O. batsensis HTCC2597	1496	544.984	2.99446	1631.93	1631.93	1.66797	28.18	33	46	R	FIEKLGTYNPLLPK	D		1	2	ZP_00999528.1
F056010	O. batsensis HTCC2597	208	538.803	1.99626	1075.59	1075.59	0.10134	29.53	76	85	R	FLEAAGVIEK	K		0	2	ZP_00999528.1
F056010	O. batsensis HTCC2597	388	602.851	1.99666	1203.69	1203.69	0.12711	40.36	76	86	R	FLEAAGVIEKK	E		1	4	ZP_00999528.1
F056010	O. batsensis HTCC2597	1073	373.215	3.9892	1488.83	1488.83	-0.464123	39.89	76	88	R	FLEAAGVIEKKER	S		2	4	ZP_00999528.1
F056010	O. batsensis HTCC2597	262	558.327	1.99639	1114.64	1114.64	0.378598	42.81	37	46	K	LGTYNPLLPK	D		0	1	ZP_00999528.1
F056010	O. batsensis HTCC2597	403	606.343	1.99668	1210.67	1210.67	1.17869	35.87	6	16	R	DLPAFTVPVPR	L		0	1	ZP_00999532.1
F056010	O. batsensis HTCC2597	1621	554.641	2.99455	1660.9	1660.9	0.605094	25.13	110	124	R	ATTQQLVSTLETLTR	A		0	1	ZP_00999565.1
F056010	O. batsensis HTCC2597	3820	885.089	2.99659	2652.25	2652.25	-0.0561788	38.25	185	210	R	VDGAAHDIEAAAGQFFLLEDTGTHAP	-		0	2	ZP_00999566.1
F056010	O. batsensis HTCC2597	14	400.726	1.99497	799.438	799.438	-0.0587913	36.24	34	39	R	AFFLFR	N		0	2	ZP_00999567.1
F056010	O. batsensis HTCC2597	770	681.909	1.99705	1361.8	1361.8	-0.00514024	48.73	65	77	R	LLNIDAAPLPVAR	T		0	2	ZP_00999567.1
F056010	O. batsensis HTCC2597	1906	878.915	1.99771	1755.82	1755.81	1.17666	46.6	60	73	K	FLEIDVDNFDDRMK	S		1	4	ZP_00999569.1
F056010	O. batsensis HTCC2597	1952	591.61	2.99489	1771.81	1771.81	-0.298565	20.13	60	73	K	FLEIDVDNFDDRMK	S	Oxidation (M) [13]	1	2	ZP_00999569.1
F056010	O. batsensis HTCC2597	152	514.794	1.99609	1027.57	1027.57	0.652021	39.79	147	155	K	IMQDPALLK	T		0	2	ZP_00999569.1
F056010	O. batsensis HTCC2597	175	522.791	1.99615	1043.57	1043.57	-1.19685	28.4	147	155	K	IMQDPALLK	T	Oxidation (M) [2]	0	2	ZP_00999569.1
F056010	O. batsensis HTCC2597	2325	636.033	2.99525	1905.08	1905.08	0.450376	37.4	147	164	K	IMQDPALLKTLAAQPAPK	A		1	2	ZP_00999569.1
F056010	O. batsensis HTCC2597	3762	874.788	2.99655	2621.34	2621.34	1.62169	49.4	147	171	K	IMQDPALLKTLAAQPAPKADSADQE	-		2	2	ZP_00999569.1
F056010	O. batsensis HTCC2597	2279	628.977	2.9952	1883.91	1883.91	0.867876	39.02	59	73	R	KFLEIDVDNFDDRMK	S		2	2	ZP_00999569.1
F056010	O. batsensis HTCC2597	2065	607.332	2.99502	1818.97	1818.97	0.64322	37.47	31	47	K	KVQLPFVMGVMSDLAGK	S		1	2	ZP_00999569.1
F056010	O. batsensis HTCC2597	4081	751.144	3.99464	3000.55	3000.54	2.27826	17.44	31	58	K	KVQLPFVMGVMSDLAGKSEVEQPAVADR	K		2	1	ZP_00999569.1
F056010	O. batsensis HTCC2597	65	467.248	1.99569	932.481	932.481	-0.657386	47.18	138	146	K	TGAEDLISK	I		0	2	ZP_00999569.1
F056010	O. batsensis HTCC2597	2446	648.356	2.99534	1942.04	1942.04	0.0993798	42.31	138	155	K	TGAEDLISKIMQDPALLK	T		1	2	ZP_00999569.1
F056010	O. batsensis HTCC2597	1436	806.895	1.9975	1611.77	1611.77	0.400801	63.33	156	171	K	TLAAQPAPKADSADQE	-		1	5	ZP_00999569.1
F056010	O. batsensis HTCC2597	1106	751.356	1.99732	1500.7	1500.7	0.807626	66.51	125	137	R	TQLSNLMTYMDGK	T		0	2	ZP_00999569.1
F056010	O. batsensis HTCC2597	3451	806.064	2.99625	2415.17	2415.17	1.79449	41.77	125	146	R	TQLSNLMTYMDGKTGAEDLISK	I		1	2	ZP_00999569.1
F056010	O. batsensis HTCC2597	3501	816.727	2.9963	2447.16	2447.16	0.816049	27.04	125	146	R	TQLSNLMTYMDGKTGAEDLISK	I	Oxidation (M) [7], Oxidation (M) [10]	1	2	ZP_00999569.1
F056010	O. batsensis HTCC2597	543	428.25	2.99294	1281.73	1281.73	-0.113909	23.69	114	124	K	VEPLKELLDAR	T		1	2	ZP_00999569.1
F056010	O. batsensis HTCC2597	1590	828.412	1.99757	1654.81	1654.81	-0.0858105	25.57	17	30	R	VQIEYDVELYGAEK	K		0	1	ZP_00999569.1
F056010	O. batsensis HTCC2597	1984	595.309	2.99492	1782.91	1782.9	0.855907	18.68	17	31	R	VQIEYDVELYGAEKK	V		1	1	ZP_00999569.1
F056010	O. batsensis HTCC2597	4004	958.492	2.99685	2872.45	2872.45	2.53025	18.67	32	58	K	VQLPFVMGVMSDLAGKSEVEQPAVADR	K		1	1	ZP_00999569.1
F056010	O. batsensis HTCC2597	4080	1001.19	2.99698	3000.55	3000.54	1.30376	27.93	32	59	K	VQLPFVMGVMSDLAGKSEVEQPAVADRK	F		2	1	ZP_00999569.1
F056010	O. batsensis HTCC2597	1204	767.865	1.99738	1533.72	1533.71	1.34249	67.8	2	14	M	AFDAFLYFPNDSK	M		0	2	ZP_00999571.1
F056010	O. batsensis HTCC2597	229	544.303	1.9963	1086.59	1086.59	0.346036	50.78	165	174	R	VLNEASLDVK	-		0	2	ZP_00999571.1
F056010	O. batsensis HTCC2597	2163	617.315	2.9951	1848.92	1848.92	0.434848	17.17	143	160	K	VTYTPQKADGTAGTPTNK	M		1	1	ZP_00999571.1
F056010	O. batsensis HTCC2597	3811	884.422	2.99658	2650.24	2650.24	-0.596549	22.73	352	375	R	IAGSNMFGSGSDRLQPEFDQPLER	V		1	2	ZP_00999588.1
F056010	O. batsensis HTCC2597	3582	834.449	2.99638	2500.33	2500.33	-0.998269	19.42	376	399	R	VAQALTETEGPVIVVGHSDNVPIR	S		0	1	ZP_00999588.1
F056010	O. batsensis HTCC2597	1660	559.933	2.9946	1676.78	1676.78	0.337553	26.24	123	138	R	IIGHTDASGSASYNER	L		0	2	ZP_00999593.1
F056010	O. batsensis HTCC2597	188	532.286	1.99622	1062.56	1062.56	0.0790546	25.39	106	114	K	LATLCQVMK	S		0	2	ZP_00999593.1
F056010	O. batsensis HTCC2597	2339	637.666	2.99526	1909.98	1909.98	0.410476	27.23	106	122	K	LATLCQVMKSADIGTFR	I		1	2	ZP_00999593.1
F056010	O. batsensis HTCC2597	656	438.602	2.99311	1312.78	1312.78	0.25366	33.1	139	149	R	LSLLRAEEVKR	Y		2	2	ZP_00999593.1
F056010	O. batsensis HTCC2597	2733	1021.5	1.99803	2040.99	2040.99	1.67811	27.15	86	106	K	GNPMVAGDGGVEVAEIVPISM	-		0	1	ZP_00999599.1
F056010	O. batsensis HTCC2597	371	594.8	1.99661	1187.59	1187.59	0.505227	20.71	40	51	R	MVTPGDPVGTSK	L		0	1	ZP_00999599.1
F056010	O. batsensis HTCC2597	1646	557.623	2.99458	1669.85	1669.85	1.04081	37.52	101	115	R	AIRDMPEGEDGLLVR	A		1	1	ZP_00999608.1
F056010	O. batsensis HTCC2597	1002	486.932	2.99379	1457.77	1457.77	0.092607	29.49	2	14	M	SIEAPETKIVESR	R		1	2	ZP_00999610.1
F056010	O. batsensis HTCC2597	1932	589.29	2.99487	1764.85	1764.85	1.30663	16.7	222	236	K	SSEVGKEFCENPKVR	K		2	1	ZP_00999612.1
F056010	O. batsensis HTCC2597	3217	1141.55	1.99824	2281.08	2281.08	1.33007	48.47	309	330	R	GVYSATAAPGDPFPAWVDRFGT	-		1	2	ZP_00999613.1
F056010	O. batsensis HTCC2597	1149	759.441	1.99735	1516.87	1516.87	1.39894	18.8	127	140	R	IPFLTAYPNAIAVK	A		0	1	ZP_00999617.1
F056010	O. batsensis HTCC2597	2323	951.463	1.99788	1900.91	1900.91	0.679674	86.7	76	94	R	ALNATFDCVLDGGAPAGPR	A		0	2	ZP_00999645.1
F056010	O. batsensis HTCC2597	592	649.286	1.9969	1296.56	1296.56	-0.150398	66.79	124	135	R	DARTFTGDSNDV	-		1	2	ZP_00999676.1
F056010	O. batsensis HTCC2597	4001	719.107	3.9944	2872.4	2872.4	0.834494	48.38	2	28	M	SGTEHTRTESTGSLLSEAMTHVSSLVR	G		1	2	ZP_00999676.1
F056010	O. batsensis HTCC2597	2882	702.357	2.9957	2104.05	2104.05	0.448659	40.8	9	28	R	TESTGSLLSEAMTHVSSLVR	G		0	2	ZP_00999676.1
F056010	O. batsensis HTCC2597	3734	860.434	2.99649	2578.28	2578.28	1.46765	24.61	168	195	R	DAPATPPTPAPSTTSPAGAASHPAPGVR	T		0	2	ZP_00999677.1
F056010	O. batsensis HTCC2597	2261	939.489	1.99786	1876.96	1876.96	1.10338	96.19	114	132	R	NNPMGFLAGAALLGFAGTR	L		0	3	ZP_00999677.1
F056010	O. batsensis HTCC2597	1982	892.45	1.99774	1782.89	1782.88	2.26936	90.76	81	97	R	TLGYMADTLADLSGTVR	N		0	3	ZP_00999677.1
F056010	O. batsensis HTCC2597	1055	741.379	1.99728	1480.74	1480.74	1.30138	32.6	2	14	M	SDYDILTDLLSAR	F		0	1	ZP_00999707.1
F056010	O. batsensis HTCC2597	2736	1022.04	1.99803	2042.07	2042.07	0.818287	47.02	173	193	R	VIASSGIPVLDMAANTADLGK	L		0	2	ZP_00999710.1
F056010	O. batsensis HTCC2597	472	625.296	1.99678	1248.58	1248.58	0.599883	67.8	226	236	R	ALSDFFADHLN	-		0	2	ZP_00999730.1
F056010	O. batsensis HTCC2597	3907	912.112	2.99669	2733.31	2733.31	0.310246	68.36	81	106	R	EVVAAEDPFDPASYGALLQIDESAAR	R		0	2	ZP_00999751.1
F056010	O. batsensis HTCC2597	4016	964.146	2.99687	2889.42	2889.41	0.395582	22.97	81	107	R	EVVAAEDPFDPASYGALLQIDESAARR	S		1	1	ZP_00999751.1
F056010	O. batsensis HTCC2597	2768	1031.96	1.99805	2061.9	2061.9	1.85169	49.4	108	126	R	SFPQVFDAAPGGDVPEEDW	-		0	2	ZP_00999751.1
F056010	O. batsensis HTCC2597	2185	620.664	2.99513	1858.97	1858.97	0.641754	25.08	53	68	R	VLLVFADSPNDPNFRR	Q		1	1	ZP_00999754.1
F056010	O. batsensis HTCC2597	2050	906.995	1.99778	1811.98	1811.98	-1.15123	21.47	685	702	K	AIFGPGTNIPSAAQDILK	L		0	1	ZP_00999755.1
F056010	O. batsensis HTCC2597	535	639.306	1.99685	1276.6	1276.6	0.603166	70.96	26	37	R	EAAEMTQGELAK	R		0	2	ZP_00999781.1
F056010	O. batsensis HTCC2597	950	717.357	1.99719	1432.7	1432.7	0.464159	93.13	26	38	R	EAAEMTQGELAKR	L		1	4	ZP_00999781.1
F056010	O. batsensis HTCC2597	943	715.884	1.99719	1429.75	1429.75	0.252491	34.58	105	116	R	ELRTDLDAKVDR	L		2	4	ZP_00999781.1
F056010	O. batsensis HTCC2597	1955	591.636	2.99489	1771.89	1771.89	0.501161	30.15	43	57	K	LSTLRGWENDLSEPR	A		1	2	ZP_00999781.1
F056010	O. batsensis HTCC2597	3688	850.372	2.99645	2548.1	2548.09	1.01566	82.94	2	25	M	MDDDTSGWYGADSATFGDRLAAAR	E		1	2	ZP_00999781.1
F056010	O. batsensis HTCC2597	362	395.575	2.99236	1183.7	1183.7	-0.43761	25.81	114	123	K	VDRLGVLEKR	L		2	2	ZP_00999781.1
F056010	O. batsensis HTCC2597	1089	747.408	1.9973	1492.8	1492.8	1.14148	61.36	80	94	R	IAAAAENDPVAKRPA	-		1	4	ZP_00999782.1
F056010	O. batsensis HTCC2597	2367	959.532	1.9979	1917.05	1917.05	0.74959	62.8	62	79	R	WITGQAEPPAPLAQVIAR	I		0	2	ZP_00999782.1
F056010	O. batsensis HTCC2597	517	635.35	1.99683	1268.69	1268.68	1.24539	52.65	18	28	R	TMAFFELLGLK	E		0	2	ZP_00999786.1
F056010	O. batsensis HTCC2597	1643	556.644	2.99457	1666.91	1666.91	0.0305955	36.8	18	31	R	TMAFFELLGLKEIR	R		1	1	ZP_00999786.1
F056010	O. batsensis HTCC2597	1686	561.976	2.99462	1682.91	1682.91	0.494383	34.45	18	31	R	TMAFFELLGLKEIR	R	Oxidation (M) [2]	1	2	ZP_00999786.1
F056010	O. batsensis HTCC2597	553	643.347	1.99687	1284.68	1284.68	0.0474827	28.29	18	28	R	TMAFFELLGLK	E	Oxidation (M) [2]	0	2	ZP_00999786.1
F056010	O. batsensis HTCC2597	3241	460.825	4.98907	2299.09	2299.09	-0.277066	17.36	71	91	R	AYHRPHVDYGSKSPGGHYGSK	S		1	1	ZP_00999793.1
F056010	O. batsensis HTCC2597	3031	1090.04	1.99815	2178.06	2178.06	2.13723	81.24	26	44	K	LFPYPASANYCPEGLQPVR	L		0	4	ZP_00999793.1
F056010	O. batsensis HTCC2597	4041	730.36	3.99448	2917.41	2917.41	0.588879	16.91	45	70	R	LGGVICCGVPNQAATYSQYQRHPVSR	A		1	1	ZP_00999793.1
F056010	O. batsensis HTCC2597	520	424.563	2.99288	1270.67	1270.67	-0.566632	23.23	26	36	K	DVFVHISAVER	S		0	2	ZP_00999795.1
F056010	O. batsensis HTCC2597	3662	845.756	2.99643	2534.25	2534.24	0.440368	42.63	14	36	K	GYGFIEPEEGGKDVFVHISAVER	S		1	2	ZP_00999795.1
F056010	O. batsensis HTCC2597	35	445.755	1.99548	889.495	889.494	0.43283	40.82	61	68	K	MASDLKLL	-		1	2	ZP_00999795.1
F056010	O. batsensis HTCC2597	42	453.752	1.99556	905.489	905.489	0.0728888	22.91	61	68	K	MASDLKLL	-	Oxidation (M) [1]	1	1	ZP_00999795.1
F056010	O. batsensis HTCC2597	810	459.922	2.99343	1376.74	1376.75	-1.65826	21.62	2	13	M	PVGTVKWFNTTK	G		1	2	ZP_00999795.1
F056010	O. batsensis HTCC2597	2914	707.691	2.99573	2120.05	2120.05	1.06931	58.55	37	56	R	SGLTGLADNQKVGYELQDGR	D		1	2	ZP_00999795.1
F056010	O. batsensis HTCC2597	3508	817.075	2.9963	2448.2	2448.2	1.69349	28.15	37	59	R	SGLTGLADNQKVGYELQDGRDGR	K		2	2	ZP_00999795.1
F056010	O. batsensis HTCC2597	2886	1053.53	1.99809	2105.04	2105.03	1.80567	100.77	149	166	R	TIYDNYAYETEILAASIR	T		0	4	ZP_00999810.1
F056010	O. batsensis HTCC2597	2135	614.355	2.99508	1840.04	1840.04	0.0967369	22.59	44	60	R	ILGGLTDRELSDIGLLR	S		1	1	ZP_00999815.1
F056010	O. batsensis HTCC2597	4226	1080.86	2.9972	3239.57	3239.57	1.40729	30.33	59	87	R	RIEADYLAPAQFDDELEVTTVTEMVTGAR	I		1	1	ZP_00999820.1
F056010	O. batsensis HTCC2597	2717	1016.51	1.99802	2031	2030.99	1.25259	102.03	210	227	R	LVGNYEAFADEFSTILSR	Q		0	4	ZP_00999821.1
F056010	O. batsensis HTCC2597	2451	972.988	1.99793	1943.96	1943.96	0.997963	57.48	137	157	R	GGFKNIGLVTDPGGPSLDGGS	-		1	1	ZP_00999822.1
F056010	O. batsensis HTCC2597	2014	597.656	2.99494	1789.94	1789.94	0.849748	33.86	118	134	R	ANAAREYLITQGVAASR	L		1	2	ZP_00999825.1
F056010	O. batsensis HTCC2597	101	486.789	1.99586	971.564	971.565	-1.32981	30.52	161	171	R	AVTVLAAGAIS	-		0	1	ZP_00999825.1
F056010	O. batsensis HTCC2597	2144	921.922	1.99781	1841.83	1841.83	0.487016	74.72	143	157	K	ERPIEICSTESCYAK	N		0	4	ZP_00999825.1
F056010	O. batsensis HTCC2597	628	654.352	1.99692	1306.69	1306.69	1.49462	77.46	123	134	R	EYLITQGVAASR	L		0	2	ZP_00999825.1
F056010	O. batsensis HTCC2597	135	503.77	1.996	1005.53	1005.52	0.736929	19.05	108	116	R	EYNLALGAR	R		0	1	ZP_00999825.1
F056010	O. batsensis HTCC2597	4372	1236.92	2.99756	3707.74	3707.73	1.93191	75.85	25	62	R	FDNDVALGGTAGADGAVVPGSANDPTSPLYFQSAVGDR	V		0	3	ZP_00999825.1
F056010	O. batsensis HTCC2597	3906	911.793	2.99669	2732.36	2732.35	2.25776	31.43	135	157	R	LKTVTYGKERPIEICSTESCYAK	N		2	1	ZP_00999825.1
F056010	O. batsensis HTCC2597	277	564.84	1.99643	1127.67	1127.67	-0.352055	25.09	160	171	R	RAVTVLAAGAIS	-		1	2	ZP_00999825.1
F056010	O. batsensis HTCC2597	3566	831.397	2.99637	2491.17	2491.17	-1.49127	37.2	137	157	K	TVTYGKERPIEICSTESCYAK	N		1	2	ZP_00999825.1
F056010	O. batsensis HTCC2597	1573	825.921	1.99756	1649.83	1649.83	0.474595	113.01	63	77	R	VLFAVDQSTLSDEAR	A		0	2	ZP_00999825.1
F056010	O. batsensis HTCC2597	4253	1111.56	2.99728	3331.66	3331.67	-0.887844	27.04	64	94	R	GTDGQDYVTIKPEDATLTDTLIQNDIPVTAK	S		0	1	ZP_00999828.1
F056010	O. batsensis HTCC2597	1388	797.465	1.99747	1592.92	1592.91	1.19655	59.94	58	73	K	LILVTAINPTPAGEGK	T		0	2	ZP_00999831.1
F056010	O. batsensis HTCC2597	617	652.844	1.99691	1303.67	1303.67	0.790075	43.82	74	86	K	TTTTVGLGDGLNR	I		0	1	ZP_00999831.1
F056010	O. batsensis HTCC2597	449	413.223	2.99269	1236.65	1236.65	0.523189	25.56	2	11	M	TYRTDIEIAR	D		1	2	ZP_00999831.1
F056010	O. batsensis HTCC2597	2641	1002.98	1.99799	2003.95	2003.95	0.229048	49.56	540	558	R	VPSAENIMLNDAGEVEGLF	-		0	2	ZP_00999831.1
F056010	O. batsensis HTCC2597	913	711.386	1.99717	1420.76	1420.76	0.6215	74	94	106	R	LVTELISEGYAAR	A		0	1	ZP_00999836.1
F056010	O. batsensis HTCC2597	547	642.849	1.99687	1283.68	1283.68	0.520378	58.55	156	167	K	GETQPLVVTQGR	E		0	2	ZP_00999847.1
F056010	O. batsensis HTCC2597	145	510.777	1.99606	1019.54	1019.54	-0.323675	37.22	60	68	R	GYVLDLANR	F		0	2	ZP_00999847.1
F056010	O. batsensis HTCC2597	1214	769.423	1.99738	1536.83	1536.83	1.06128	66.72	187	199	K	LILDGQYAQVVYR	N		0	2	ZP_00999847.1
F056010	O. batsensis HTCC2597	3148	752.089	2.99598	2253.24	2253.24	0.344836	54.33	147	167	R	SRLEAVVSKGETQPLVVTQGR	E		2	3	ZP_00999847.1
F056010	O. batsensis HTCC2597	650	657.297	1.99694	1312.58	1312.58	0.857092	74.93	209	222	R	TGLTGVDFSSSGGE	-		0	2	ZP_00999847.1
F056010	O. batsensis HTCC2597	777	683.354	1.99705	1364.69	1364.69	0.325348	71.13	174	186	R	TVTEVNGFVANSK	L		0	2	ZP_00999847.1
F056010	O. batsensis HTCC2597	1474	813.478	1.99752	1624.94	1624.94	1.14527	71.64	170	185	R	IITNLGVLDVVDGGLK	I		0	2	ZP_00999853.1
F056010	O. batsensis HTCC2597	343	586.298	1.99656	1170.58	1170.58	0.287037	43.13	127	137	R	VANAPAALECR	L		0	2	ZP_00999874.1
F056010	O. batsensis HTCC2597	2366	640.007	2.99528	1917	1917	1.87637	25.27	21	38	K	GTRPTPASQIAFNTSELK	S		0	1	ZP_00999899.1
F056010	O. batsensis HTCC2597	4161	1030.45	2.99707	3088.34	3088.34	0.615218	26.65	144	171	R	FAEEADELGEDFDPDAAMDELLYTASPK	E		0	1	ZP_00999917.1
F056010	O. batsensis HTCC2597	1725	425.454	3.99053	1697.78	1697.78	1.03311	15.67	7	20	R	FHGSEDMKVDSKYR	L		2	1	ZP_00999917.1
F056010	O. batsensis HTCC2597	3768	875.772	2.99655	2624.29	2624.29	2.87735	25.7	54	78	R	LDGFVEGYSIDSIAEIQDALSASPK	A		0	2	ZP_00999917.1
F056010	O. batsensis HTCC2597	2222	623.984	2.99516	1868.93	1868.93	1.14397	35.32	30	45	R	VLESQDPDWTPDKLAR	M		1	2	ZP_00999917.1
F056010	O. batsensis HTCC2597	336	583.78	1.99655	1165.54	1165.54	0.77303	67.85	45	54	R	DDIAMAFLDR	T		0	1	ZP_00999941.1
F056010	O. batsensis HTCC2597	2831	1042.52	1.99807	2083.03	2083.03	0.599608	72.07	27	44	R	NALELTEGDYPSVIYFPR	D		0	2	ZP_00999941.1
F056010	O. batsensis HTCC2597	3268	770.342	2.99608	2308.01	2308.01	-0.398612	31.11	76	95	K	STTHENAAWSYETPIEGMER	I		0	1	ZP_00999941.1
F056010	O. batsensis HTCC2597	1403	800.329	1.99748	1598.64	1598.64	1.77526	17.73	313	327	R	CFDEELPESAASSAS	-		0	1	ZP_00999946.1
F056010	O. batsensis HTCC2597	1793	862.433	1.99766	1722.85	1722.85	0.907798	50.3	110	127	R	GGEGDVVFTGVMTTLVAA	-		0	2	ZP_00999973.1
F056010	O. batsensis HTCC2597	2198	622.665	2.99515	1864.97	1864.97	1.24506	18.63	64	79	K	GNVHGSQFFELHRLPK	V		1	1	ZP_00999973.1
F056010	O. batsensis HTCC2597	988	726.849	1.99723	1451.68	1451.68	0.862448	77.17	80	92	K	VGETLTTDVECTK	K		0	2	ZP_00999973.1
F056010	O. batsensis HTCC2597	1341	790.896	1.99745	1579.78	1579.78	0.440569	51.1	80	93	K	VGETLTTDVECTKK	E		1	4	ZP_00999973.1
F056010	O. batsensis HTCC2597	2542	660.342	2.99542	1978.01	1978	0.792213	23.26	80	96	K	VGETLTTDVECTKKEIR	K		2	2	ZP_00999973.1
F056010	O. batsensis HTCC2597	314	578.786	1.99652	1155.56	1155.56	1.38635	36.28	101	109	K	WVETTYTTR	G		0	2	ZP_00999973.1
F056010	O. batsensis HTCC2597	2562	662.689	2.99544	1985.04	1985.04	0.13904	29.29	68	85	R	FVRPVRENDVVTGGGVER	E		1	3	ZP_00999974.1
F056010	O. batsensis HTCC2597	4300	851.931	3.99527	3403.69	3403.69	1.0377	18.9	68	97	R	FVRPVRENDVVTGGGVEREDTPGTYDVWVR	N		2	2	ZP_00999974.1
F056010	O. batsensis HTCC2597	1696	844.432	1.99761	1686.85	1686.84	3.90967	78.34	98	113	R	NQKDEPVITGTATVSQ	-		1	2	ZP_00999974.1
F056010	O. batsensis HTCC2597	417	608.817	1.99669	1215.62	1215.62	-0.255014	19.37	52	63	R	QTLGNEAVAGTR	L		0	1	ZP_00999974.1
F056010	O. batsensis HTCC2597	3436	802.441	2.99623	2404.3	2404.3	1.59257	19.42	63	85	R	ALQIDAVTLLAAAEAATELDHRI	-		1	1	ZP_00999993.1
F056010	O. batsensis HTCC2597	522	636.37	1.99683	1270.73	1270.72	0.925456	27.26	128	139	K	DAAQLATLLSRL	-		1	1	ZP_01000026.1
F056010	O. batsensis HTCC2597	2440	971.957	1.99793	1941.9	1941.9	1.11437	46.36	1	17	-	METVGLGFCYEDLPVGR	R		0	2	ZP_01000073.1
F056010	O. batsensis HTCC2597	2485	979.952	1.99794	1957.89	1957.89	-0.794222	54.14	1	17	-	METVGLGFCYEDLPVGR	R	Oxidation (M) [1]	0	1	ZP_01000073.1
F056010	O. batsensis HTCC2597	2867	700.341	2.99569	2098	2098	1.27884	24.62	1	18	-	METVGLGFCYEDLPVGRR	F		1	2	ZP_01000073.1
F056010	O. batsensis HTCC2597	2957	717.392	2.99579	2149.15	2149.15	0.760765	18.09	129	146	R	NKVFKQTGEQVLEYTPLR	M		2	1	ZP_01000073.1
F056010	O. batsensis HTCC2597	1202	767.399	1.99737	1532.78	1532.78	0.251177	30.9	134	146	K	QTGEQVLEYTPLR	M		0	2	ZP_01000073.1
F056010	O. batsensis HTCC2597	2334	636.68	2.99525	1907.02	1907.02	1.05558	17.44	131	146	K	VFKQTGEQVLEYTPLR	M		1	1	ZP_01000073.1
F056010	O. batsensis HTCC2597	3350	783.041	2.99614	2346.1	2346.1	0.9113	41.59	94	114	K	VMGPTFAGDTIHCEVEVIESR	R		0	2	ZP_01000073.1
F056010	O. batsensis HTCC2597	1472	813.473	1.99752	1624.93	1624.93	0.611719	49.45	151	164	K	AVFLPNQLIDNLLR	R		0	2	ZP_01000157.1
F056010	O. batsensis HTCC2597	3143	750.435	2.99597	2248.28	2248.28	1.01322	20.23	20	38	R	LLHVLCALPYEFIVPLPVR	A		0	2	ZP_01000157.1
F056010	O. batsensis HTCC2597	1712	565.304	2.99465	1692.89	1692.89	0.386912	57.31	29	44	K	ATAIHPTQQSAITQAR	D		0	2	ZP_01000159.1
F056010	O. batsensis HTCC2597	2470	652.322	2.99537	1953.94	1953.94	0.142788	20.46	45	62	R	DIARNQGSEMLVHGTNGR	I		1	1	ZP_01000159.1
F056010	O. batsensis HTCC2597	2268	940.939	1.99786	1879.86	1879.86	2.13952	58.6	88	105	R	FAVDYDQAQALTAPDGQA	-		0	5	ZP_01000178.1
F056010	O. batsensis HTCC2597	2640	668.68	2.99548	2003.02	2003.01	2.86668	23.42	4	20	R	HIVFFTAINDDNIESIR	K		0	1	ZP_01000178.1
F056010	O. batsensis HTCC2597	1912	440.747	3.99086	1758.96	1758.96	-1.3832	21.13	45	59	R	ERGEVVIHRPNGQIR	D		1	1	ZP_01000181.1
F056010	O. batsensis HTCC2597	2859	699.035	2.99568	2094.08	2094.07	4.54521	17.43	107	124	R	IYFSEGDIRDDLGNLLVR	A		1	1	ZP_01000253.1
F056010	O. batsensis HTCC2597	1515	818.905	1.99754	1635.8	1635.79	1.72088	99.04	90	104	K	ALPLQSFMEGESTAR	F		0	2	ZP_01000300.1
F056010	O. batsensis HTCC2597	2594	666.362	2.99547	1996.06	1996.06	0.323136	36.21	58	76	R	EAAHAAGVPVILTEVTYQK	G		0	2	ZP_01000300.1
F056010	O. batsensis HTCC2597	3532	1237.11	1.99837	2472.2	2472.19	1.90034	63.39	194	217	K	YADVVSEKDIIDYLGSLSGSAAAE	-		1	3	ZP_01000300.1
F056010	O. batsensis HTCC2597	2399	642.322	2.9953	1923.94	1923.94	0.374751	45.44	268	284	R	AYVDDVETTGVETLKER	G		1	2	ZP_01000354.1
F056010	O. batsensis HTCC2597	1147	759.394	1.99735	1516.77	1516.77	0.371183	95.73	314	329	K	AVEAVGSNDSSAIVAK	M		0	2	ZP_01000359.1
F056010	O. batsensis HTCC2597	491	629.375	1.9968	1256.74	1256.73	0.838682	37.23	193	203	K	SLVELIDLVTR	L		0	1	ZP_01000394.1
F056010	O. batsensis HTCC2597	2639	668.678	2.99548	2003.01	2003.01	0.919615	37.96	146	162	R	ALVDAIQQYEDSIHFVR	V		0	2	ZP_01000436.1
F056010	O. batsensis HTCC2597	204	538.28	1.99626	1074.55	1074.55	-0.13401	43.38	119	128	R	DYLVGPNAAR	V		0	2	ZP_01000452.1
F056010	O. batsensis HTCC2597	1688	561.979	2.99462	1682.92	1682.91	0.619758	30.05	109	123	R	AVFSVHPEPFTLLAR	S		0	2	ZP_01000454.1
F056010	O. batsensis HTCC2597	165	520.26	1.99613	1038.51	1038.51	0.860852	16.62	311	319	R	AYKELGLMD	-		1	1	ZP_01000454.1
F056010	O. batsensis HTCC2597	180	528.257	1.99619	1054.5	1054.5	-0.592698	21.92	311	319	R	AYKELGLMD	-	Oxidation (M) [8]	1	1	ZP_01000454.1
F056010	O. batsensis HTCC2597	425	611.3	1.9967	1220.58	1220.58	1.69345	56.08	99	108	K	FSDNPFPEIR	A		0	2	ZP_01000454.1
F056010	O. batsensis HTCC2597	990	727.836	1.99723	1453.66	1453.66	-0.418943	73.89	124	137	R	SDSGIESFEDLAGK	R		0	1	ZP_01000454.1
F056010	O. batsensis HTCC2597	4450	1388.6	2.99782	4162.78	4162.78	0.85736	43.82	2	39	M	ADEPEDKKPDETETAPEQAEQAAPEAEETVMDAMMSSR	G		1	4	ZP_01000496.1
F056010	O. batsensis HTCC2597	4456	1045.7	3.99615	4178.78	4178.77	1.52533	27.23	2	39	M	ADEPEDKKPDETETAPEQAEQAAPEAEETVMDAMMSSR	G	Oxidation (M) [34]	1	2	ZP_01000496.1
F056010	O. batsensis HTCC2597	4454	1045.7	3.99615	4178.77	4178.77	-0.389109	27.19	2	39	M	ADEPEDKKPDETETAPEQAEQAAPEAEETVMDAMMSSR	G	Oxidation (M) [35]	1	2	ZP_01000496.1
F056010	O. batsensis HTCC2597	347	587.31	1.99657	1172.61	1172.6	1.15043	59.61	103	112	R	GDLVKLDEER	V		1	2	ZP_01000496.1
F056010	O. batsensis HTCC2597	727	670.365	1.99699	1338.71	1338.71	0.390673	57.93	87	98	K	IGEPVDIVINDR	L		0	2	ZP_01000496.1
F056010	O. batsensis HTCC2597	1973	593.676	2.99491	1778.01	1778.01	0.816646	33.16	87	102	K	IGEPVDIVINDRLVAR	G		1	2	ZP_01000496.1
F056010	O. batsensis HTCC2597	3462	807.436	2.99626	2419.29	2419.28	0.653086	34.75	108	128	K	LDEERVGVSLIEIVKDYVSEK	-		2	3	ZP_01000496.1
F056010	O. batsensis HTCC2597	61	465.278	1.99567	928.541	928.542	-0.325241	27.79	67	74	R	MPISQLLK	L		0	2	ZP_01000496.1
F056010	O. batsensis HTCC2597	1971	889.502	1.99774	1776.99	1776.99	1.54362	70.79	113	128	R	VGVSLIEIVKDYVSEK	-		1	3	ZP_01000496.1
F056010	O. batsensis HTCC2597	1961	888.463	1.99773	1774.91	1774.91	1.08287	69.23	79	94	R	LGAETLVDLAQDFVER	V		0	2	ZP_01000503.1
F056010	O. batsensis HTCC2597	2038	601.653	2.99498	1801.94	1801.94	0.368493	16.55	2	18	M	SSILTNHSAMTALSTLR	S		0	1	ZP_01000503.1
F056010	O. batsensis HTCC2597	1926	881.456	1.99771	1760.9	1760.89	1.57761	68.25	79	94	R	LGAETLVDLANDFVER	V		0	2	ZP_01000505.1
F056010	O. batsensis HTCC2597	741	675.301	1.99702	1348.59	1348.59	-0.957296	33.28	122	133	R	DVSSSQHFDQSL	-		0	1	ZP_01000506.1
F056010	O. batsensis HTCC2597	1297	784.397	1.99743	1566.78	1566.78	1.47309	36.17	75	89	K	SLSDQVFDLISSGTV	-		0	1	ZP_01000539.1
F056010	O. batsensis HTCC2597	1175	509.24	2.99407	1524.7	1524.7	-0.0163967	34.66	39	52	R	IEEGHSPGEVGCVR	N		0	2	ZP_01000582.1
F056010	O. batsensis HTCC2597	579	646.888	1.99689	1291.76	1291.76	0.501641	53.77	174	186	R	TAAPILAGLNPVR	A		0	2	ZP_01000695.1
F056010	O. batsensis HTCC2597	3288	1161.65	1.99827	2321.28	2321.28	1.62367	68.9	119	141	R	ASLQLMQALGAPLTGLPEVAVSR	-		0	4	ZP_01000703.1
F056010	O. batsensis HTCC2597	3327	780.098	2.99613	2337.27	2337.27	0.45951	42.03	119	141	R	ASLQLMQALGAPLTGLPEVAVSR	-	Oxidation (M) [6]	0	1	ZP_01000703.1
F056010	O. batsensis HTCC2597	4090	1003.53	2.99699	3007.57	3007.56	3.22853	46.08	53	83	K	EVATPSAPATGTLGTTIASLGNAAEPGVWLR	T		0	2	ZP_01000703.1
F056010	O. batsensis HTCC2597	4142	1022.53	2.99704	3064.56	3064.56	0.457489	36.4	89	118	R	VRAPGQVSYQGQSVEAELIPIPGEPGSGSR	A		1	2	ZP_01000703.1
F056010	O. batsensis HTCC2597	323	579.783	1.99653	1157.55	1157.55	0.822427	67.47	41	51	R	AAGPGLVEECR	T		0	2	ZP_01000717.1
F056010	O. batsensis HTCC2597	2046	905.979	1.99778	1809.94	1809.94	1.58679	66.3	111	128	R	SIAFPAISTGVYGFPAGR	A		0	2	ZP_01000717.1
F056010	O. batsensis HTCC2597	502	631.813	1.99681	1261.61	1261.61	-0.0317055	33.66	134	143	R	KVYDQMPEPR	Y		1	1	ZP_01000724.1
F056010	O. batsensis HTCC2597	1044	738.891	1.99727	1475.77	1475.77	0.99406	101.66	114	127	R	QSDVMIVAGTLTNK	M		0	2	ZP_01000724.1
F056010	O. batsensis HTCC2597	3749	870.089	2.99653	2607.24	2607.24	2.0071	46.47	27	53	K	TGPSAVAAYGPHGAGPDPEMATQALNK	E		0	2	ZP_01000724.1
F056010	O. batsensis HTCC2597	590	432.223	2.99301	1293.65	1293.65	0.472308	18.15	99	109	R	YDAERFGIAPR	A		1	1	ZP_01000724.1
F056010	O. batsensis HTCC2597	1525	820.383	1.99754	1638.75	1638.75	-0.427154	51.35	66	80	R	DAFAGDPDYSIAELR	L		0	2	ZP_01000726.1
F056010	O. batsensis HTCC2597	1235	516.596	2.99415	1546.77	1546.77	0.649096	27.17	1	14	-	MKDADLSAIEAEVR	E		1	1	ZP_01000726.1
F056010	O. batsensis HTCC2597	2651	670.33	2.99549	2007.97	2007.97	1.27492	44.34	62	80	R	VGGRDAFAGDPDYSIAELR	L		1	3	ZP_01000726.1
F056010	O. batsensis HTCC2597	3170	756.027	2.996	2265.06	2265.06	0.369968	27.57	23	44	R	DVPADAVSAYDEAVASVGCTLR	S		0	2	ZP_01000728.1
F056010	O. batsensis HTCC2597	375	598.305	1.99663	1194.6	1194.6	0.170769	27.02	61	70	R	EQVLEMTAFK	L		0	2	ZP_01000728.1
F056010	O. batsensis HTCC2597	1409	535.289	2.99435	1602.85	1602.85	-0.039929	34.86	71	85	K	LATDKAEKLEDGSVK	L		2	2	ZP_01000728.1
F056010	O. batsensis HTCC2597	2204	622.98	2.99515	1865.92	1865.92	0.0407306	35.3	45	60	R	SEKDYLPVEIQTGMTR	E		1	2	ZP_01000728.1
F056010	O. batsensis HTCC2597	2275	628.314	2.99519	1881.92	1881.91	2.52775	21.15	45	60	R	SEKDYLPVEIQTGMTR	E	Oxidation (M) [14]	1	1	ZP_01000728.1
F056010	O. batsensis HTCC2597	3517	614.532	3.99344	2454.1	2454.1	0.268938	17.57	103	126	R	ADHQDAVAAASAGCSDRPGWTPSK	A		0	2	ZP_01000733.1
F056010	O. batsensis HTCC2597	1479	814.397	1.99753	1626.78	1626.78	1.56014	58.82	39	53	R	ESGSVEVFIPEGSYK	V		0	2	ZP_01000733.1
F056010	O. batsensis HTCC2597	3778	878.433	2.99656	2632.28	2632.27	1.3779	32.38	66	91	R	QAEAWVFGPGVSAPFTMSDGGVPGLR	V		0	2	ZP_01000733.1
F056010	O. batsensis HTCC2597	430	612.859	1.99671	1223.7	1223.7	1.3165	33.03	54	65	K	VAFLPLASPPGR	Q		0	2	ZP_01000733.1
F056010	O. batsensis HTCC2597	564	429.91	2.99297	1286.71	1286.71	-0.825361	18.45	51	62	R	AAFVVTVRDPGR	S		1	2	ZP_01000734.1
F056010	O. batsensis HTCC2597	2084	914.462	1.9978	1826.91	1826.91	2.12162	39.75	26	40	R	NLLGNRVEFDGQYFR	T		1	2	ZP_01000734.1
F056010	O. batsensis HTCC2597	1629	555.962	2.99456	1664.86	1664.86	-0.0973053	42.32	34	48	K	ATVNYPHEKGPLSPR	F		1	2	ZP_01000741.1
F056010	O. batsensis HTCC2597	3715	858.075	2.99648	2571.2	2571.21	-0.518045	20.03	70	92	K	LCEAICPAQAITIDAEPREDGSR	R		1	1	ZP_01000741.1
F056010	O. batsensis HTCC2597	232	545.78	1.99631	1089.55	1089.55	0.557113	50.65	156	164	R	NLEIDAPYR	-		0	2	ZP_01000741.1
F056010	O. batsensis HTCC2597	2310	945.938	1.99787	1889.86	1889.86	0.319071	82.75	43	60	K	GVSDGSKELEDAQAEEAR	D		1	4	ZP_01000763.1
F056010	O. batsensis HTCC2597	2678	673.66	2.99551	2017.96	2017.96	1.47278	60.16	42	60	K	KGVSDGSKELEDAQAEEAR	D		2	4	ZP_01000763.1
F056010	O. batsensis HTCC2597	2273	941.957	1.99786	1881.9	1881.9	-0.308199	74.99	199	214	R	EVFDPSTLDEVESFLR	T		0	2	ZP_01000781.1
F056010	O. batsensis HTCC2597	3827	1330.67	1.99849	2659.33	2659.32	3.48773	63.82	72	98	R	NAGLEAFDNVAGGETAGIPFAALVAER	M		0	3	ZP_01000781.1
F056010	O. batsensis HTCC2597	3830	889.784	2.9966	2666.33	2666.33	0.365296	24.36	28	52	R	AMALAEQAELDLVEISPNATPPVCK	I		0	2	ZP_01000794.1
F056010	O. batsensis HTCC2597	1579	827.444	1.99757	1652.87	1652.87	0.43016	83.77	12	27	R	LIGAEGENLGVVTPER	A		0	2	ZP_01000794.1
F056010	O. batsensis HTCC2597	497	630.848	1.99681	1259.68	1259.68	0.376286	43.26	154	164	R	QMIMMIGPVIK	-		0	2	ZP_01000794.1
F056010	O. batsensis HTCC2597	4395	1252.29	2.99759	3753.84	3753.83	1.77366	27.97	84	122	R	LAPTGAVPQEMEEVPALPDGGSLLPPAPSTGGDLTPSAD	-		0	4	ZP_01000821.1
F056010	O. batsensis HTCC2597	602	649.864	1.9969	1297.71	1297.71	0.868451	50.37	144	156	R	VLIEGTPADLSAI	-		0	2	ZP_01000854.1
F056010	O. batsensis HTCC2597	965	719.827	1.9972	1437.64	1437.64	0.943214	53.93	3	14	R	CPFCGNIDTQVK	D		0	2	ZP_01000880.1
F056010	O. batsensis HTCC2597	4246	1109.53	2.99728	3325.55	3325.54	3.51311	31.48	127	155	R	FASVYKNFQAADDFDKFVSELRPESASEE	-		2	1	ZP_01000880.1
F056010	O. batsensis HTCC2597	649	656.855	1.99693	1311.69	1311.69	0.85462	26.35	38	47	R	FTTYERVQLR	D		1	1	ZP_01000880.1
F056010	O. batsensis HTCC2597	1049	740.352	1.99728	1478.69	1478.69	0.253603	64.75	143	155	K	FVSELRPESASEE	-		0	2	ZP_01000880.1
F056010	O. batsensis HTCC2597	69	468.761	1.9957	935.508	935.508	0.447885	51.94	119	126	R	IDTVAYVR	F		0	2	ZP_01000880.1
F056010	O. batsensis HTCC2597	1801	863.399	1.99767	1724.78	1724.78	1.83792	61.32	1	14	-	MRCPFCGNIDTQVK	D		1	4	ZP_01000880.1
F056010	O. batsensis HTCC2597	4159	772.869	3.99479	3087.45	3087.44	0.777666	22.52	1	26	-	MRCPFCGNIDTQVKDSRPAEDHVSIR	R		2	3	ZP_01000880.1
F056010	O. batsensis HTCC2597	1855	581.266	2.9948	1740.78	1740.77	1.59412	22.7	1	14	-	MRCPFCGNIDTQVK	D	Oxidation (M) [1]	1	1	ZP_01000880.1
F056010	O. batsensis HTCC2597	341	585.756	1.99656	1169.5	1169.5	-0.401026	30.34	133	142	K	NFQAADDFDK	F		0	1	ZP_01000880.1
F056010	O. batsensis HTCC2597	3775	1316.1	1.99847	2630.18	2630.18	1.60331	67.26	133	155	K	NFQAADDFDKFVSELRPESASEE	-		1	4	ZP_01000880.1
F056010	O. batsensis HTCC2597	3927	690.861	3.99417	2759.42	2759.42	-1.30897	15.31	94	118	R	RLESMGETDIPSKVIGEIVMEALAR	I	Oxidation (M) [5]	2	1	ZP_01000880.1
F056010	O. batsensis HTCC2597	2554	496.022	3.99188	1980.06	1980.06	1.12673	19.37	77	93	K	RPVDPERIDQMISGIVR	R		1	2	ZP_01000880.1
F056010	O. batsensis HTCC2597	2593	666.361	2.99547	1996.06	1996.05	4.40319	20.03	77	93	K	RPVDPERIDQMISGIVR	R	Oxidation (M) [11]	1	1	ZP_01000880.1
F056010	O. batsensis HTCC2597	605	650.868	1.9969	1299.72	1299.72	-0.602437	73.94	107	118	K	VIGEIVMEALAR	I		0	2	ZP_01000880.1
F056010	O. batsensis HTCC2597	361	394.924	2.99235	1181.75	1181.75	0.240322	29.39	44	53	R	VQLRDLVVIK	S		1	2	ZP_01000880.1
F056010	O. batsensis HTCC2597	1351	528.962	2.99429	1583.86	1583.86	0.488679	24.22	175	188	R	VGDRINLEIDTLAR	Y		1	2	ZP_01000885.1
F056010	O. batsensis HTCC2597	333	582.843	1.99654	1163.67	1163.67	1.02263	39.54	21	30	K	ALIVVAPYYR	D		0	2	ZP_01000888.1
F056010	O. batsensis HTCC2597	3204	758.758	2.99602	2273.25	2273.25	0.0936983	28.13	21	41	K	ALIVVAPYYRDIADNLIAGAR	A		1	2	ZP_01000888.1
F056010	O. batsensis HTCC2597	3319	1166.06	1.99827	2330.11	2330.11	2.05527	53.04	160	182	K	ANVGFLPTPEEYQLAGDPGSPTA	-		0	2	ZP_01000888.1
F056010	O. batsensis HTCC2597	276	564.804	1.99643	1127.59	1127.59	0.344096	48.36	31	41	R	DIADNLIAGAR	A		0	1	ZP_01000888.1
F056010	O. batsensis HTCC2597	174	522.296	1.99614	1042.58	1042.58	0.921754	65.41	45	54	K	GIAASLLQDR	V		0	2	ZP_01000891.1
F056010	O. batsensis HTCC2597	320	579.308	1.99652	1156.6	1156.6	1.34619	26.15	107	115	R	IFDLPFMFK	D		0	2	ZP_01000891.1
F056010	O. batsensis HTCC2597	247	550.807	1.99634	1099.6	1099.6	0.0691161	78.05	283	293	K	QAIIDAGGTVR	T		0	2	ZP_01000891.1
F056010	O. batsensis HTCC2597	2291	629.328	2.9952	1884.96	1884.96	0.0530515	17.41	153	170	K	QMSANKPLLSPSDAEGLK	F		0	1	ZP_01000891.1
F056010	O. batsensis HTCC2597	2775	1034.54	1.99805	2067.07	2067.07	2.13636	83.56	173	192	R	VQPSEVLVAQMEAIGGSPQK	M		0	3	ZP_01000891.1
F056010	O. batsensis HTCC2597	3018	725.685	2.99584	2174.03	2174.03	1.97881	43.63	116	133	R	CEPTRFFGIADMLYAQQK	D		1	2	ZP_01000909.1
F056010	O. batsensis HTCC2597	992	728.845	1.99724	1455.68	1455.67	0.819551	61.78	134	147	K	DWIGNGDPAGIADR	L		0	2	ZP_01000909.1
F056010	O. batsensis HTCC2597	1193	766.384	1.99737	1530.75	1530.75	-0.800912	57.4	121	133	R	FFGIADMLYAQQK	D		0	2	ZP_01000909.1
F056010	O. batsensis HTCC2597	3428	800.741	2.99623	2399.2	2399.2	0.782344	37.44	151	173	K	IGLVAGLEAEAIDACLADEDKAR	S		1	2	ZP_01000909.1
F056010	O. batsensis HTCC2597	3653	843.44	2.99642	2527.3	2527.3	1.67017	77.22	150	173	R	KIGLVAGLEAEAIDACLADEDKAR	S		2	4	ZP_01000909.1
F056010	O. batsensis HTCC2597	911	709.834	1.99716	1417.65	1417.65	0.903607	72.55	2	13	M	AYAYDDQNIFAK	I		0	2	ZP_01000913.1
F056010	O. batsensis HTCC2597	813	689.79	1.99708	1377.57	1377.57	0.391996	66.63	80	92	R	EMEVTADGGPGCR	F		0	2	ZP_01000913.1
F056010	O. batsensis HTCC2597	3049	731.007	2.99587	2190	2190	0.116895	31.07	73	92	R	VVAQVCREMEVTADGGPGCR	F		1	1	ZP_01000913.1
F056010	O. batsensis HTCC2597	1276	520.265	2.99419	1557.77	1557.77	-0.203495	37.18	90	104	K	GGADVRLEEIEGGTR	L		1	2	ZP_01000930.1
F056010	O. batsensis HTCC2597	3642	632.824	3.99363	2527.27	2527.27	-0.0597483	22.27	90	112	K	GGADVRLEEIEGGTRLHYEVEAK	V		2	2	ZP_01000930.1
F056010	O. batsensis HTCC2597	4315	860.146	3.99532	3436.55	3436.55	0.80575	29.02	131	162	K	KMADQFFENFANAVEGPKDEAAAEEGPGDQPK	E		2	2	ZP_01000930.1
F056010	O. batsensis HTCC2597	4236	1103.83	2.99726	3308.47	3308.46	2.53895	72.6	132	162	K	MADQFFENFANAVEGPKDEAAAEEGPGDQPK	E		1	4	ZP_01000930.1
F056010	O. batsensis HTCC2597	1103	750.872	1.99732	1499.73	1499.73	0.316724	51.43	145	160	K	AIMAASGQDVPAVAAE	-		0	2	ZP_01000931.1
F056010	O. batsensis HTCC2597	71	468.779	1.9957	935.544	935.544	-0.168886	40.79	20	27	R	TLLSSFLR	E		0	2	ZP_01000931.1
F056010	O. batsensis HTCC2597	4416	959.207	3.9958	3832.8	3832.79	1.18556	28.69	20	54	R	TLLSSFLREELGLTGTHVGCDTSQCGACTVHVDGR	Q		1	2	ZP_01000931.1
F056010	O. batsensis HTCC2597	2537	660.001	2.99542	1976.98	1976.98	-0.0222562	45.44	19	35	R	RQPEIYGAETLTDVETR	C		1	2	ZP_01000951.1
F056010	O. batsensis HTCC2597	3237	1150.55	1.99825	2299.08	2299.08	-0.20095	35.73	19	39	R	GELFGPGNAQLPEPPMLMMDR	I		0	3	ZP_01000968.1
F056010	O. batsensis HTCC2597	1497	545.578	2.99446	1633.71	1633.72	-1.25603	24.31	131	143	R	ASDEYNMRLSYNR	A	Oxidation (M) [7]	1	1	ZP_01000974.1
F056010	O. batsensis HTCC2597	4012	961.775	2.99686	2882.3	2882.3	0.76432	58.69	82	106	R	GNVCGVMETDQFFATDKYYISPANR	Q		1	2	ZP_01000974.1
F056010	O. batsensis HTCC2597	4027	967.107	2.99688	2898.3	2898.3	1.75413	48.73	82	106	R	GNVCGVMETDQFFATDKYYISPANR	Q	Oxidation (M) [7]	1	2	ZP_01000974.1
F056010	O. batsensis HTCC2597	1211	513.244	2.99411	1536.71	1536.71	0.11388	22.84	163	176	R	GYGERMPAATNNTR	A		1	2	ZP_01000974.1
F056010	O. batsensis HTCC2597	8	377.71	1.99467	753.406	753.406	-0.351736	29.55	109	114	R	LAEFFK	S		0	1	ZP_01000974.1
F056010	O. batsensis HTCC2597	3389	790.741	2.99618	2369.2	2369.2	0.345686	47.25	109	130	R	LAEFFKSSTATAFIIAGHTDSR	A		1	2	ZP_01000974.1
F056010	O. batsensis HTCC2597	3822	664.348	3.99394	2653.36	2653.36	0.775997	15.22	107	130	R	QRLAEFFKSSTATAFIIAGHTDSR	A		2	1	ZP_01000974.1
F056010	O. batsensis HTCC2597	155	515.789	1.99609	1029.56	1029.56	0.156377	30.34	184	191	R	RVEIICIQ	-		1	2	ZP_01000974.1
F056010	O. batsensis HTCC2597	1502	817.911	1.99754	1633.81	1633.81	1.1311	94.48	115	130	K	SSTATAFIIAGHTDSR	A		0	2	ZP_01000974.1
F056010	O. batsensis HTCC2597	1385	797.393	1.99747	1592.77	1592.77	1.30025	49.93	95	109	R	GGHIFDPRTPTNPQG	-		1	2	ZP_01000975.1
F056010	O. batsensis HTCC2597	3325	779.051	2.99612	2334.13	2334.13	-0.120816	26.02	71	93	R	LDPYGKPVCSGTAPPNTATGGFK	R		0	2	ZP_01000975.1
F056010	O. batsensis HTCC2597	3564	831.086	2.99636	2490.23	2490.23	0.968986	32.59	71	94	R	LDPYGKPVCSGTAPPNTATGGFKR	G		1	2	ZP_01000975.1
F056010	O. batsensis HTCC2597	3480	809.738	2.99627	2426.19	2426.19	1.13511	36.76	52	75	R	CDGVAIDGLIAAVPGADWTALDAR	E		0	1	ZP_01000987.1
F056010	O. batsensis HTCC2597	3625	839.775	2.9964	2516.3	2516.3	0.582203	31.4	82	105	R	VALLDGISHAAEDAGEIAVYHIPR	D		0	4	ZP_01000987.1
F056010	O. batsensis HTCC2597	3883	1358.14	1.99852	2714.27	2714.26	0.811638	35.71	97	119	K	IKPSEPSQMDDYLSEKEYQDLIS	-		1	4	ZP_01000989.1
F056010	O. batsensis HTCC2597	3903	911.094	2.99668	2730.26	2730.26	1.17535	26.61	97	119	K	IKPSEPSQMDDYLSEKEYQDLIS	-	Oxidation (M) [9]	1	2	ZP_01000989.1
F056010	O. batsensis HTCC2597	1887	874.956	1.9977	1747.9	1747.89	1.79473	50.66	55	69	R	AYYLYYVTAPNAAIR	Y		0	2	ZP_01000998.1
F056010	O. batsensis HTCC2597	3783	880.467	2.99657	2638.38	2638.38	0.680721	21.93	166	188	R	MINDHVIDLYNRVEIGTPVTVLQ	-		1	1	ZP_01000998.1
F056010	O. batsensis HTCC2597	2272	627.688	2.99519	1880.04	1880.04	0.601583	22.82	70	88	R	YGIAVAKPGLGYTGTATIK	R		0	2	ZP_01000998.1
F056010	O. batsensis HTCC2597	752	677.362	1.99703	1352.71	1352.71	-0.0103496	23.07	2	13	M	ATGTVKWFNTTK	G		1	2	ZP_01000999.1
F056010	O. batsensis HTCC2597	58	459.25	1.99561	916.486	916.487	-0.0851076	31.24	60	68	R	ESASNLALL	-		0	1	ZP_01000999.1
F056010	O. batsensis HTCC2597	358	591.793	1.9966	1181.57	1181.57	0.306372	43.3	14	25	K	GYGFIAPEGGSK	D		0	2	ZP_01000999.1
F056010	O. batsensis HTCC2597	3492	812.418	2.99628	2434.23	2434.23	1.91149	39.35	14	36	K	GYGFIAPEGGSKDVFVHISAVER	S		1	2	ZP_01000999.1
F056010	O. batsensis HTCC2597	3375	789.063	2.99617	2364.17	2364.17	-0.425097	25.89	37	59	R	SGLTGLQDGAKVSFDLESGRDGR	E		2	2	ZP_01000999.1
F056010	O. batsensis HTCC2597	721	446.553	2.99323	1336.64	1336.64	-0.204992	26.37	48	59	K	VSFDLESGRDGR	E		1	3	ZP_01000999.1
F056010	O. batsensis HTCC2597	594	649.338	1.9969	1296.66	1296.66	0.533679	38	90	100	R	KSILAEIFDFD	-		1	2	ZP_01001009.1
F056010	O. batsensis HTCC2597	1975	593.953	2.99491	1778.84	1778.84	1.05125	23.3	1	15	-	MKCPVDDTELLMTAR	Q		1	1	ZP_01001009.1
F056010	O. batsensis HTCC2597	445	618.788	1.99674	1235.56	1235.56	0.305125	59.81	16	25	R	QGVEIDYCPR	C		0	2	ZP_01001009.1
F056010	O. batsensis HTCC2597	339	585.29	1.99656	1168.57	1168.57	0.21137	38.75	91	100	K	SILAEIFDFD	-		0	2	ZP_01001009.1
F056010	O. batsensis HTCC2597	2187	621.647	2.99514	1861.92	1861.92	-0.0338361	17.47	81	97	R	KPNVRPGGYGDNFATNR	R		0	1	ZP_01001014.1
F056010	O. batsensis HTCC2597	78	473.272	1.99574	944.529	944.529	0.157751	39.37	131	139	K	ASVLVVRDS	-		1	2	ZP_01001069.1
F056010	O. batsensis HTCC2597	3756	655.314	3.99385	2617.23	2617.23	0.156654	44.58	70	94	R	HGITTGAHAMTSHDPATDLDPTLMK	A		0	4	ZP_01001069.1
F056010	O. batsensis HTCC2597	434	614.831	1.99672	1227.65	1227.65	1.09396	24.23	170	181	R	AVSARPDVLEAT	-		0	2	ZP_01001071.1
F056010	O. batsensis HTCC2597	1319	787.882	1.99744	1573.75	1573.75	0.618904	80.16	108	123	R	ELGNPYAGVGADAQGR	M		0	1	ZP_01001083.1
F056010	O. batsensis HTCC2597	1451	809.421	1.99751	1616.83	1616.83	1.08175	45.56	81	96	K	ATLADVKSKTEPAEAS	-		2	2	ZP_01001092.1
F056010	O. batsensis HTCC2597	483	628.865	1.9968	1255.71	1255.71	0.816269	53.88	44	56	R	GDLVVTQGGIIGK	V		0	1	ZP_01001092.1
F056010	O. batsensis HTCC2597	899	706.915	1.99715	1411.82	1411.81	0.509982	71.5	43	56	R	RGDLVVTQGGIIGK	V		1	4	ZP_01001092.1
F056010	O. batsensis HTCC2597	1842	580.357	2.99479	1738.05	1738.05	1.35094	44.62	43	59	R	RGDLVVTQGGIIGKVVK	V		2	2	ZP_01001092.1
F056010	O. batsensis HTCC2597	184	353.226	2.99145	1056.65	1056.65	0.653004	37.62	78	87	R	VIKATLADVK	S		1	4	ZP_01001092.1
F056010	O. batsensis HTCC2597	2152	923.464	1.99782	1844.91	1844.91	-0.229279	41.07	149	163	K	AWYEVNDIPMPEILR	W		0	2	ZP_01001119.1
F056010	O. batsensis HTCC2597	1529	820.4	1.99754	1638.79	1638.78	0.93728	73.18	213	227	R	IVASHEVDDDIAEAR	E		0	4	ZP_01001119.1
F056010	O. batsensis HTCC2597	1524	546.953	2.99448	1637.84	1637.84	1.78467	15.52	136	148	R	WFPLGFQESFRPK	A		0	1	ZP_01001119.1
F056010	O. batsensis HTCC2597	2879	702.339	2.9957	2103.99	2103.99	0.509507	18.9	164	180	R	WIEPLMNDGDEYEKLPR	F		1	2	ZP_01001119.1
F056010	O. batsensis HTCC2597	191	532.773	1.99622	1063.53	1063.53	0.768197	42.25	120	129	R	ATFLIDGDGR	I		0	2	ZP_01001138.1
F056010	O. batsensis HTCC2597	713	445.917	2.99322	1334.73	1334.73	-0.20978	19.55	139	151	K	VAGHVDEVLAAVR	E		0	1	ZP_01001138.1
F056010	O. batsensis HTCC2597	1293	522.962	2.99422	1565.86	1565.86	-0.136027	25.28	65	78	R	VLGVSRDTVEKHAR	F		2	2	ZP_01001138.1
F056010	O. batsensis HTCC2597	3057	734.023	2.99588	2199.05	2199.04	1.27283	43.58	167	186	R	KPTQSEESYLEAGGYGQTVR	E		0	2	ZP_01001142.1
F056010	O. batsensis HTCC2597	3634	631.36	3.99362	2521.41	2521.41	-0.0701988	30.17	102	124	R	FRHMPVVEDGKLIGIVTIGDVVK	A		2	2	ZP_01001155.1
F056010	O. batsensis HTCC2597	3673	1270.16	1.99841	2538.3	2538.29	1.90876	87.14	11	35	K	GADGVVTVTPDTPVSQVAQVLSENR	I		0	4	ZP_01001155.1
F056010	O. batsensis HTCC2597	3076	740.421	2.99592	2218.24	2218.24	0.867354	44.63	104	124	R	HMPVVEDGKLIGIVTIGDVVK	A		1	4	ZP_01001155.1
F056010	O. batsensis HTCC2597	3500	612.353	3.99342	2445.38	2445.38	1.9359	50.3	104	126	R	HMPVVEDGKLIGIVTIGDVVKAR	L		2	2	ZP_01001155.1
F056010	O. batsensis HTCC2597	3486	810.767	2.99627	2429.28	2429.28	1.10033	29.66	36	59	R	IGGVVVSTSGDTAEGILSERDIVR	A		1	2	ZP_01001155.1
F056010	O. batsensis HTCC2597	2560	993.476	1.99797	1984.94	1984.93	1.33355	62.36	127	144	R	LNELSMERDALEGMIAGH	-		1	4	ZP_01001155.1
F056010	O. batsensis HTCC2597	2630	667.984	2.99548	2000.93	2000.93	0.175918	38.98	127	144	R	LNELSMERDALEGMIAGH	-	Oxidation (M) [6]	1	2	ZP_01001155.1
F056010	O. batsensis HTCC2597	102	486.8	1.99586	971.584	971.584	0.713268	45.81	1	8	-	MIVQQILK	S		0	2	ZP_01001155.1
F056010	O. batsensis HTCC2597	4371	927.758	3.99566	3707	3706.99	2.83599	31.64	1	35	-	MIVQQILKSKGADGVVTVTPDTPVSQVAQVLSENR	I		2	2	ZP_01001155.1
F056010	O. batsensis HTCC2597	3922	918.814	2.99671	2753.42	2753.42	0.539693	63.78	9	35	K	SKGADGVVTVTPDTPVSQVAQVLSENR	I		1	2	ZP_01001155.1
F056010	O. batsensis HTCC2597	2381	961.926	1.99791	1921.84	1921.83	1.45746	75.37	96	111	R	AVADFEYEYQMVGMNR	S		0	1	ZP_01001156.1
F056010	O. batsensis HTCC2597	615	652.828	1.99691	1303.64	1303.64	0.32601	36.67	40	50	R	DKGPLFDLEDR	V		1	2	ZP_01001156.1
F056010	O. batsensis HTCC2597	493	420.575	2.99282	1258.7	1258.7	-0.633191	23.57	149	159	K	FVTPAVNDKLR	A		1	2	ZP_01001156.1
F056010	O. batsensis HTCC2597	1764	856.925	1.99765	1711.84	1711.83	1.16892	67.91	112	127	R	SLDSSVETVFLMADAK	R		0	2	ZP_01001156.1
F056010	O. batsensis HTCC2597	2207	623.653	2.99515	1867.94	1867.93	1.02787	41.21	112	128	R	SLDSSVETVFLMADAKR	Q		1	1	ZP_01001156.1
F056010	O. batsensis HTCC2597	2121	919.021	1.99781	1836.03	1836.02	1.55989	58.84	122	139	R	AILDALAPLLAETPKETA	-		1	4	ZP_01001163.1
F056010	O. batsensis HTCC2597	2874	701.697	2.99569	2102.07	2102.07	-0.0223589	48.22	92	110	R	LGDAELIDRTMAAELESLR	A		1	2	ZP_01001163.1
F056010	O. batsensis HTCC2597	3714	857.092	2.99647	2568.25	2568.25	0.687627	24.41	36	59	R	VAGVLNYMGVDYSDVNVLADEGIR	Q		0	1	ZP_01001165.1
F056010	O. batsensis HTCC2597	888	705.884	1.99715	1409.75	1409.75	0.729916	69.11	2	13	M	PIQAQDIEDLIR	E		0	2	ZP_01001166.1
F056010	O. batsensis HTCC2597	3267	1154.62	1.99826	2307.24	2307.23	1.42422	62.48	323	344	K	QSADEVLDLLGVENNPILAVAK	E		0	4	ZP_01001180.1
F056010	O. batsensis HTCC2597	2015	597.656	2.99494	1789.95	1789.95	0.497222	24.96	23	39	R	DALADKGFGVLTEIDVK	A		1	1	ZP_01001273.1
F056010	O. batsensis HTCC2597	763	678.878	1.99703	1355.74	1355.74	0.234558	20.94	74	85	R	IGAMLPCNVILR	Q		0	2	ZP_01001273.1
F056010	O. batsensis HTCC2597	1555	823.434	1.99755	1644.85	1644.85	-0.167188	30.88	117	130	R	MQDVFEPVLEAVLR	E		0	1	ZP_01001291.1
F056010	O. batsensis HTCC2597	3069	739.74	2.99592	2216.2	2216.2	0.30999	30.14	29	48	R	LAILGALCNEPLAVHELVER	T		0	2	ZP_01001308.1
F056010	O. batsensis HTCC2597	507	422.23	2.99284	1263.67	1263.67	0.559482	18.55	51	61	K	LSQPNVSNHLR	C		0	1	ZP_01001308.1
F056010	O. batsensis HTCC2597	1059	742.357	1.99729	1482.7	1482.7	0.797195	89.05	92	104	R	FGPDYSITLEERG	-		1	2	ZP_01001370.1
F056010	O. batsensis HTCC2597	1844	870.405	1.99769	1738.79	1738.79	0.114447	93.2	44	61	K	AAEMGFSLNDLTGSGGGR	G		0	2	ZP_01001414.1
F056010	O. batsensis HTCC2597	52	458.261	1.9956	914.507	914.507	0	33.78	35	43	K	AALAELEAK	A		0	2	ZP_01001414.1
F056010	O. batsensis HTCC2597	1288	781.891	1.99742	1561.77	1561.77	1.35488	85.87	2	15	M	ANIDLNSMDLSELK	S		0	2	ZP_01001414.1
F056010	O. batsensis HTCC2597	815	460.565	2.99344	1378.67	1378.67	0.0145067	30.95	20	31	K	DVDAAIKTFEDR	K		1	1	ZP_01001414.1
F056010	O. batsensis HTCC2597	1456	540.942	2.99441	1619.81	1619.81	-0.318557	37.28	84	96	R	GRQPDWYKEQVSK	G		2	2	ZP_01001414.1
F056010	O. batsensis HTCC2597	875	704.913	1.99714	1407.81	1407.81	1.34962	60.27	97	109	K	GTAPEDLLIVKPR	-		0	2	ZP_01001414.1
F056010	O. batsensis HTCC2597	1736	567.941	2.99468	1700.8	1700.8	-0.248706	68.17	70	83	K	YRHPENDALTWSGR	G		1	2	ZP_01001414.1
F056010	O. batsensis HTCC2597	2043	905.968	1.99778	1809.92	1809.92	1.28072	43.06	332	347	R	SFDVPVLEDFTIPFGK	A		0	2	ZP_01001436.1
F056010	O. batsensis HTCC2597	3139	1125.02	1.99821	2248.02	2248.02	0.404801	92.12	106	126	R	CAYVEDGEGNVVGLIAPLEED	-		0	4	ZP_01001437.1
F056010	O. batsensis HTCC2597	1313	787.317	1.99744	1572.62	1572.62	0.358638	82.71	69	82	R	GGTMTFEVDDCDAR	Y		0	2	ZP_01001437.1
F056010	O. batsensis HTCC2597	423	610.795	1.9967	1219.58	1219.57	1.34309	58.89	42	52	R	AGAYDNVAFHR	V		0	4	ZP_01001442.1
F056010	O. batsensis HTCC2597	2018	896.926	1.99775	1791.84	1791.83	0.967165	56.31	77	94	R	MAGTGGSDLPDLPAEFSK	L		0	1	ZP_01001442.1
F056010	O. batsensis HTCC2597	4114	1013.18	2.99702	3036.51	3036.51	0.15116	34.09	77	106	R	MAGTGGSDLPDLPAEFSKLPHDRGTLGAAR	S		2	1	ZP_01001442.1
F056010	O. batsensis HTCC2597	3910	912.744	2.99669	2735.21	2735.21	1.56113	54.26	53	76	R	VIDGFMAQTGDVQHANMEQDYNPR	M		0	2	ZP_01001442.1
F056010	O. batsensis HTCC2597	3434	801.729	2.99623	2402.16	2402.16	-0.23687	41.82	137	158	R	VIEGMEHVDAITRGEPPANPDR	M		1	2	ZP_01001442.1
F056010	O. batsensis HTCC2597	1710	847.381	1.99762	1692.75	1692.74	1.65235	90.89	84	100	R	SVADGEEVETGGETSAR	Q		0	2	ZP_01001471.1
F056010	O. batsensis HTCC2597	1298	784.426	1.99743	1566.84	1566.84	0.191469	60.85	138	153	R	ASGLADLQPGEAVALR	V		0	2	ZP_01001473.1
F056010	O. batsensis HTCC2597	4328	1176.88	2.99743	3527.61	3527.61	1.02222	38.52	77	104	R	ETFGDWQLQCVRQEDTESEPCQLYQLLR	G		1	1	ZP_01001478.1
F056010	O. batsensis HTCC2597	577	646.852	1.99689	1291.69	1291.69	0.930565	54.73	145	156	R	IAVDGSQGKVYR	Y		1	3	ZP_01001478.1
F056010	O. batsensis HTCC2597	436	614.869	1.99672	1227.72	1227.72	-0.194669	17.73	169	180	R	IGLLPADIAAFK	A		0	2	ZP_01001478.1
F056010	O. batsensis HTCC2597	2648	1004.97	1.998	2007.93	2007.92	2.34173	41.87	89	104	R	QEDTESEPCQLYQLLR	G		0	1	ZP_01001478.1
F056010	O. batsensis HTCC2597	1093	748.807	1.99731	1495.6	1495.6	0.938755	57.26	157	168	R	YAFCNSNACYAR	I		0	2	ZP_01001478.1
F056010	O. batsensis HTCC2597	2319	633.999	2.99523	1898.97	1898.97	0.588212	45.66	39	56	R	AFGDAILAALEQGEPLER	A		0	4	ZP_01001493.1
F056010	O. batsensis HTCC2597	4030	726.638	3.99446	2902.52	2902.51	2.23255	17.51	25	53	R	ALHDAGATVGLSGTRVEPLEALAAELGER	A		1	1	ZP_01001497.1
F056010	O. batsensis HTCC2597	124	498.261	1.99596	994.507	994.508	-1.49119	37.15	165	173	K	SIAYEVASR	G		0	1	ZP_01001497.1
F056010	O. batsensis HTCC2597	3344	782.395	2.99614	2344.16	2344.16	0.303307	33.59	57	77	R	KGHYAFLKSDAPAPAVQEMER	L		2	3	ZP_01001500.1
F056010	O. batsensis HTCC2597	3372	591.047	3.99318	2360.16	2360.16	0.261423	15.49	57	77	R	KGHYAFLKSDAPAPAVQEMER	L	Oxidation (M) [19]	2	1	ZP_01001500.1
F056010	O. batsensis HTCC2597	464	415.565	2.99273	1243.67	1243.67	0.278209	36.78	2	11	M	PLYEHVFIAR	Q		0	2	ZP_01001500.1
F056010	O. batsensis HTCC2597	3740	867.425	2.99652	2599.25	2599.25	0.328171	28.71	12	36	R	QDLSNAQAEGLIEHFGTVLSDNGGK	L		0	2	ZP_01001500.1
F056010	O. batsensis HTCC2597	860	700.828	1.99713	1399.64	1399.64	0.354377	65	65	77	K	SDAPAPAVQEMER	L		0	2	ZP_01001500.1
F056010	O. batsensis HTCC2597	2998	722.384	2.99582	2164.13	2164.13	0.166349	27.82	88	106	R	VLTIRVEEHAEGPSIQMQK	K		1	2	ZP_01001500.1
F056010	O. batsensis HTCC2597	288	567.85	1.99645	1133.69	1133.68	0.355478	44.74	66	75	R	FLALLPYAVK	-		0	2	ZP_01001501.1
F056010	O. batsensis HTCC2597	1295	784.384	1.99743	1566.75	1566.75	0.820168	73.62	97	111	R	DVAAVTTEAGYSVER	K		0	2	ZP_01001502.1
F056010	O. batsensis HTCC2597	80	474.779	1.99576	947.544	947.544	0.271228	29.49	28	35	R	NYLLLQGK	A		0	2	ZP_01001502.1
F056010	O. batsensis HTCC2597	1053	740.855	1.99728	1479.69	1479.7	-0.365616	62.49	82	96	R	SASDGGNLYGSVTPR	D		0	2	ZP_01001502.1
F056010	O. batsensis HTCC2597	3444	803.024	2.99624	2406.05	2406.05	0.987927	30.72	34	55	R	DRAEYEDGRDATGAEAYAAYGR	E		2	3	ZP_01001504.1
F056010	O. batsensis HTCC2597	2010	448.003	3.99101	1787.98	1787.98	0.490497	21.84	17	31	R	EKERPGPIHMLNLVR	L		1	1	ZP_01001504.1
F056010	O. batsensis HTCC2597	1196	511.289	2.99409	1530.84	1530.85	-0.263906	31.91	19	31	K	ERPGPIHMLNLVR	L		0	2	ZP_01001504.1
F056010	O. batsensis HTCC2597	677	442.909	2.99318	1325.71	1325.71	0.239872	29.1	56	67	R	ESQPVLDRLGGR	I		1	1	ZP_01001504.1
F056010	O. batsensis HTCC2597	1658	838.92	1.9976	1675.83	1675.82	0.90642	57.46	125	139	R	LIRMEPLDTGANFAE	-		1	2	ZP_01001504.1
F056010	O. batsensis HTCC2597	1706	846.918	1.99762	1691.82	1691.82	1.41859	61.11	125	139	R	LIRMEPLDTGANFAE	-	Oxidation (M) [4]	1	2	ZP_01001504.1
F056010	O. batsensis HTCC2597	586	647.785	1.99689	1293.56	1293.55	0.885158	70.98	128	139	R	MEPLDTGANFAE	-		0	1	ZP_01001504.1
F056010	O. batsensis HTCC2597	2186	930.511	1.99784	1859.01	1859	1.41743	48.55	18	34	K	EALQEFGIQGLSVIEVK	G		0	1	ZP_01001510.1
F056010	O. batsensis HTCC2597	448	619.328	1.99675	1236.64	1236.64	1.30192	51.6	48	58	R	GAEYVVDFLPK	V		0	2	ZP_01001510.1
F056010	O. batsensis HTCC2597	504	631.859	1.99681	1261.7	1261.7	0.340809	66.58	91	101	K	IFVSSIEQAIR	I		0	2	ZP_01001510.1
F056010	O. batsensis HTCC2597	1815	866.985	1.99768	1731.96	1731.95	2.15248	77.17	86	101	K	IGDGKIFVSSIEQAIR	I		1	4	ZP_01001510.1
F056010	O. batsensis HTCC2597	693	665.321	1.99697	1328.63	1328.63	-0.407187	45.6	118	130	K	AADGPIEEMPAKT	-		1	2	ZP_01001524.1
F056010	O. batsensis HTCC2597	781	456.899	2.99339	1367.68	1367.68	-0.337799	25.47	46	57	R	EGKIPGAFHCPR	G		1	2	ZP_01001524.1
F056010	O. batsensis HTCC2597	3974	945.793	2.9968	2834.36	2834.35	1.05139	49.6	91	117	R	SALSALTAQEMGLENVSHISDGFSGWK	A		0	2	ZP_01001524.1
F056010	O. batsensis HTCC2597	1332	788.926	1.99745	1575.84	1575.84	0.357905	35.78	15	29	R	VSHAPAAELLDLQGR	E		0	3	ZP_01001524.1
F056010	O. batsensis HTCC2597	2868	700.364	2.99569	2098.07	2098.07	-0.238791	20.14	142	161	R	IGASANLEEHHLEAPVVVDV	-		0	2	ZP_01001530.1
F056010	O. batsensis HTCC2597	1233	515.951	2.99414	1544.83	1544.83	-0.137879	34.96	2	15	M	AKGYLTTHVLDTAR	G		1	2	ZP_01001533.1
F056010	O. batsensis HTCC2597	556	643.386	1.99687	1284.76	1284.76	0.969834	32.58	16	28	R	GVPAAGIGIVLYR	L		0	2	ZP_01001533.1
F056010	O. batsensis HTCC2597	1360	793.437	1.99746	1584.86	1584.86	1.19569	88.59	175	191	R	ASAVANVLINSGVSAGR	I		0	4	ZP_01001534.1
F056010	O. batsensis HTCC2597	1019	490.599	2.99384	1468.77	1468.77	-0.0272336	18.34	204	216	R	ATNLTPEGRQLNR	R		1	1	ZP_01001534.1
F056010	O. batsensis HTCC2597	3890	907.144	2.99667	2718.41	2718.41	0.471599	47.31	69	96	K	GALIGGVAGALAGAAYGDYLDRQEAALR	S		1	2	ZP_01001534.1
F056010	O. batsensis HTCC2597	1534	547.604	2.99448	1639.79	1639.79	-0.0152458	36.87	198	212	R	GEDQPRATNLTPEGR	Q		1	2	ZP_01001534.1
F056010	O. batsensis HTCC2597	3311	777.06	2.99611	2328.16	2328.16	0.606918	20.7	192	212	R	IQSFGRGEDQPRATNLTPEGR	Q		2	1	ZP_01001534.1
F056010	O. batsensis HTCC2597	3982	712.634	3.99435	2846.5	2846.5	0.369225	65.17	68	96	K	KGALIGGVAGALAGAAYGDYLDRQEAALR	S		2	4	ZP_01001534.1
F056010	O. batsensis HTCC2597	4277	1120.27	2.9973	3357.79	3357.79	0.820779	60.12	112	142	R	LVVTMPQDILFATDSASLRPDLTTDLVTVAR	S		0	4	ZP_01001534.1
F056010	O. batsensis HTCC2597	4287	1125.6	2.99732	3373.78	3373.78	0.248386	44.46	112	142	R	LVVTMPQDILFATDSASLRPDLTTDLVTVAR	S	Oxidation (M) [5]	0	4	ZP_01001534.1
F056010	O. batsensis HTCC2597	1866	871.488	1.99769	1740.96	1740.96	0.798985	81.65	174	191	R	RASAVANVLINSGVSAGR	I		1	5	ZP_01001534.1
F056010	O. batsensis HTCC2597	274	563.846	1.99643	1125.68	1125.68	0.9612	30.58	217	226	R	RVDIVILPTT	-		1	4	ZP_01001534.1
F056010	O. batsensis HTCC2597	1371	794.9	1.99747	1587.79	1587.79	0.746323	101.24	97	111	R	SELGSNVQIVNTGDR	L		0	6	ZP_01001534.1
F056010	O. batsensis HTCC2597	4305	1135.89	2.99734	3404.64	3404.63	1.36608	64.05	143	173	R	SLNEYPRTTVQVVGHTDNTGDAAYNQQLSAR	R		1	3	ZP_01001534.1
F056010	O. batsensis HTCC2597	4335	713.156	4.99294	3560.74	3560.74	1.68336	26.31	143	174	R	SLNEYPRTTVQVVGHTDNTGDAAYNQQLSARR	A		2	4	ZP_01001534.1
F056010	O. batsensis HTCC2597	1265	778.431	1.99741	1554.85	1554.85	-0.469499	93.88	46	64	R	TGAAGGAALGAIAGAALSR	D		0	4	ZP_01001534.1
F056010	O. batsensis HTCC2597	2293	629.341	2.9952	1885	1885	0.351724	33.6	46	67	R	TGAAGGAALGAIAGAALSRDSK	K		1	2	ZP_01001534.1
F056010	O. batsensis HTCC2597	3682	1273.62	1.99842	2545.22	2545.22	0.675385	78.94	150	173	R	TTVQVVGHTDNTGDAAYNQQLSAR	R		0	6	ZP_01001534.1
F056010	O. batsensis HTCC2597	3876	901.447	2.99665	2701.32	2701.32	1.08799	55.32	150	174	R	TTVQVVGHTDNTGDAAYNQQLSARR	A		1	4	ZP_01001534.1
F056010	O. batsensis HTCC2597	3232	460.267	4.98906	2296.3	2296.3	-0.239951	30.83	2	23	M	AKPLTKTQLVAALADELGSDKK	T		2	4	ZP_01001539.1
F056010	O. batsensis HTCC2597	690	664.899	1.99697	1327.78	1327.78	0.387865	41.43	76	87	K	EADRVVKVTIAK	A		2	4	ZP_01001539.1
F056010	O. batsensis HTCC2597	596	649.359	1.9969	1296.7	1296.7	0.205907	73.01	39	53	K	EVSGGGAVAIPGVGK	F		0	2	ZP_01001539.1
F056010	O. batsensis HTCC2597	2396	962.492	1.99791	1922.97	1922.97	1.22883	49.23	39	57	K	EVSGGGAVAIPGVGKFYCR	E		1	4	ZP_01001539.1
F056010	O. batsensis HTCC2597	934	714.907	1.99718	1427.8	1427.8	0.755009	91.67	24	38	K	TAGAALDALANVITK	E		0	6	ZP_01001539.1
F056010	O. batsensis HTCC2597	3879	677.631	3.99405	2706.49	2706.49	1.07298	48.43	24	53	K	TAGAALDALANVITKEVSGGGAVAIPGVGK	F		1	4	ZP_01001539.1
F056010	O. batsensis HTCC2597	4255	834.197	3.99517	3332.76	3332.76	1.50026	32.76	24	57	K	TAGAALDALANVITKEVSGGGAVAIPGVGKFYCR	E		2	2	ZP_01001539.1
F056010	O. batsensis HTCC2597	1605	829.952	1.99757	1657.89	1657.89	0.124858	77.9	8	23	K	TQLVAALADELGSDKK	T		1	5	ZP_01001539.1
F056010	O. batsensis HTCC2597	699	665.39	1.99697	1328.77	1328.77	-0.221258	46.3	83	95	K	VTIAKALKDSVNA	-		2	2	ZP_01001539.1
F056010	O. batsensis HTCC2597	249	551.293	1.99635	1100.57	1100.57	-0.0654206	73.93	125	136	R	DLLDAALAAASA	-		0	2	ZP_01001542.1
F056010	O. batsensis HTCC2597	786	685.886	1.99706	1369.76	1369.76	0.995067	40.17	123	136	R	IRDLLDAALAAASA	-		1	2	ZP_01001542.1
F056010	O. batsensis HTCC2597	1600	553.313	2.99454	1656.92	1656.92	0.59991	68.95	99	113	R	RSTLVVLKGDDEIGR	L		2	2	ZP_01001542.1
F056010	O. batsensis HTCC2597	1114	501.279	2.99397	1500.82	1500.81	0.265189	27.9	100	113	R	STLVVLKGDDEIGR	L		1	1	ZP_01001542.1
F056010	O. batsensis HTCC2597	3466	808.44	2.99626	2422.3	2422.3	0.436776	20.13	46	68	K	AANPLGKLPALLREDGPAVYDSR	V		2	4	ZP_01001553.1
F056010	O. batsensis HTCC2597	1278	520.274	2.99419	1557.8	1557.8	-0.753626	38.61	1	13	-	MKLYYSPASPFVR	K		1	2	ZP_01001553.1
F056010	O. batsensis HTCC2597	705	667.841	1.99698	1333.67	1333.67	0.466383	32.99	176	187	R	TQAPDLAAWYAK	F		0	2	ZP_01001553.1
F056010	O. batsensis HTCC2597	1562	823.901	1.99755	1645.79	1645.78	1.34404	63.08	73	87	R	YLNDEHGGALYPAAR	I		0	4	ZP_01001553.1
F056010	O. batsensis HTCC2597	2990	1082.03	1.99814	2162.04	2162.03	2.1896	63.15	190	211	R	AADDLEAAGMGSETAVLAALMR	A		0	2	ZP_01001554.1
F056010	O. batsensis HTCC2597	686	664.864	1.99697	1327.71	1327.71	2.48473	38.28	18	31	R	EVSAIAPSSAAVAR	K		0	2	ZP_01001573.1
F056010	O. batsensis HTCC2597	3724	859.436	2.99648	2575.29	2575.28	1.08376	54.95	32	56	R	KMTEGVENVEGPIVEIGPGTGSFTK	A		1	2	ZP_01001573.1
F056010	O. batsensis HTCC2597	243	549.821	1.99634	1097.63	1097.63	0.532968	37.2	68	76	R	LILMELNPR	F		0	2	ZP_01001573.1
F056010	O. batsensis HTCC2597	3425	799.431	2.99622	2395.27	2395.27	0.612875	33.48	2	22	M	AQNDITLVCWRDIPAQVIVGK	G		1	2	ZP_01001587.1
F056010	O. batsensis HTCC2597	1229	772.416	1.99739	1542.82	1542.82	1.31837	25.97	29	41	K	AVLPERFEQAIDR	A		1	2	ZP_01001587.1
F056010	O. batsensis HTCC2597	2107	612.316	2.99506	1833.93	1833.92	2.57863	49.69	77	91	R	EIARLDAEYDQDRLK	A		2	3	ZP_01001587.1
F056010	O. batsensis HTCC2597	2011	597.32	2.99494	1788.94	1788.94	0.154282	53.21	60	76	R	KLPLPPQEGDPSDVAAR	E		1	2	ZP_01001587.1
F056010	O. batsensis HTCC2597	2123	919.462	1.99781	1836.91	1836.91	1.19603	60.93	12	27	K	TVVIGFDEPFCVIGER	I		0	2	ZP_01001589.1
F056010	O. batsensis HTCC2597	3544	826.095	2.99634	2475.26	2475.26	2.18765	39.26	12	33	K	TVVIGFDEPFCVIGERINPTGR	K		1	2	ZP_01001589.1
F056010	O. batsensis HTCC2597	1482	816.436	1.99753	1630.86	1630.86	0.502803	73.83	294	309	R	VVDAVKEGATFPEAAK	A		1	4	ZP_01001589.1
F056010	O. batsensis HTCC2597	780	684.352	1.99706	1366.69	1366.69	0.663648	72.7	36	48	R	DFFAGITDIVGGR	S		0	2	ZP_01001599.1
F056010	O. batsensis HTCC2597	981	483.591	2.99375	1447.75	1447.75	-0.314971	24.66	61	72	R	RTAFAELEERAR	A		2	2	ZP_01001599.1
F056010	O. batsensis HTCC2597	1701	846.472	1.99762	1690.93	1690.93	0.0390318	16.48	35	48	R	QNISLPYLEQLFVK	L		0	2	ZP_01001602.1
F056010	O. batsensis HTCC2597	1619	554.301	2.99455	1659.88	1659.88	-0.142179	27.97	51	66	R	RAEVVTSVRGPGGGYR	L		2	2	ZP_01001602.1
F056010	O. batsensis HTCC2597	2118	918.51	1.99781	1835.01	1835	0.564031	74.12	76	92	R	VIEVLAAVDETIDALHK	G		0	5	ZP_01001602.1
F056010	O. batsensis HTCC2597	3964	941.174	2.99679	2820.5	2820.5	0.721149	47.6	76	104	R	VIEVLAAVDETIDALHKGAGATGGLSGTR	A		1	3	ZP_01001602.1
F056010	O. batsensis HTCC2597	68	468.264	1.9957	934.512	934.512	0.0781156	47.34	164	172	R	FGATLEGLK	Y		0	2	ZP_01001608.1
F056010	O. batsensis HTCC2597	758	678.37	1.99703	1354.72	1354.72	-0.0287881	60.84	164	175	R	FGATLEGLKYTR	I		1	4	ZP_01001608.1
F056010	O. batsensis HTCC2597	3605	837.727	2.99639	2510.16	2510.16	0.570482	36.08	120	142	R	RNEGWAAGADVEYAFSNDGLNVR	T		1	1	ZP_01001608.1
F056010	O. batsensis HTCC2597	3814	1326.2	1.99848	2650.38	2650.38	0.964768	74.06	52	78	K	SVATLVMPVITEAGFGLGGSYGQGALR	I		0	6	ZP_01001608.1
F056010	O. batsensis HTCC2597	3832	889.8	2.9966	2666.38	2666.37	1.63593	49.27	52	78	K	SVATLVMPVITEAGFGLGGSYGQGALR	I	Oxidation (M) [7]	0	2	ZP_01001608.1
F056010	O. batsensis HTCC2597	2920	1062.54	1.9981	2123.07	2123.06	1.2741	103.93	143	163	R	TDTNSGLSPVVAYVFAQAGAR	F		0	7	ZP_01001608.1
F056010	O. batsensis HTCC2597	2256	626.323	2.99518	1875.95	1875.95	0.256404	41.54	31	46	R	VDATLGHLYQKYPESR	E		1	2	ZP_01001608.1
F056010	O. batsensis HTCC2597	4470	1091.03	3.99631	4360.08	4360.08	1.12223	27.77	15	54	R	FAMLLADSTHHLQDEASNAPNIDEIGCYVFEGGTGILLNK	G		0	2	ZP_01001668.1
F056010	O. batsensis HTCC2597	4034	972.462	2.99689	2914.36	2914.36	-0.0120095	47.8	55	80	K	GVWHDFPMAIDQPVTCITGNSDEVVK	A		0	2	ZP_01001668.1
F056010	O. batsensis HTCC2597	110	490.774	1.9959	979.534	979.534	0.631933	68.74	105	113	R	LGIEIAVEH	-		0	2	ZP_01001668.1
F056010	O. batsensis HTCC2597	3430	801.099	2.99623	2400.27	2400.27	2.36723	28.36	10	31	R	AIDLAKENVENGGWPFSTIIVK	D		1	2	ZP_01001669.1
F056010	O. batsensis HTCC2597	3648	843.435	2.99642	2527.28	2527.28	0.907299	52.15	107	130	K	DAALSKLPLTDALYDLVSEDHGGK	V		1	3	ZP_01001669.1
F056010	O. batsensis HTCC2597	1032	491.592	2.99385	1471.75	1471.75	1.60081	48.76	32	45	K	DGEILAEAVNSVQK	S		0	1	ZP_01001669.1
F056010	O. batsensis HTCC2597	2444	971.993	1.99793	1941.97	1941.97	1.17355	57.86	113	130	K	LPLTDALYDLVSEDHGGK	V		0	4	ZP_01001669.1
F056010	O. batsensis HTCC2597	746	675.861	1.99702	1349.71	1349.71	0.291174	70.61	94	105	K	LTDVVYAVDVEK	K		0	2	ZP_01001669.1
F056010	O. batsensis HTCC2597	1047	739.909	1.99728	1477.8	1477.8	0.431045	65.66	94	106	K	LTDVVYAVDVEKK	D		1	4	ZP_01001669.1
F056010	O. batsensis HTCC2597	1152	759.869	1.99735	1517.72	1517.72	0.397965	55.72	46	59	K	SHDPSDHAEIAAIR	I		0	6	ZP_01001669.1
F056010	O. batsensis HTCC2597	2364	480.249	3.99161	1916.97	1916.97	-1.61818	33.31	46	63	K	SHDPSDHAEIAAIRIASK	K		1	2	ZP_01001669.1
F056010	O. batsensis HTCC2597	3200	758.689	2.99602	2273.05	2273.04	1.66737	22.62	131	149	K	VVSYTHMSEFSEQGEQLFR	E		0	1	ZP_01001669.1
F056010	O. batsensis HTCC2597	682	664.828	1.99697	1327.64	1327.64	0.157422	60.05	23	35	K	GGSDLNFGTYGLK	A		0	2	ZP_01001673.1
F056010	O. batsensis HTCC2597	3473	808.749	2.99626	2423.22	2423.22	2.03944	61.58	23	45	K	GGSDLNFGTYGLKATQPERVSAR	Q		2	2	ZP_01001673.1
F056010	O. batsensis HTCC2597	2434	486.007	3.99171	1940	1940	-0.536082	26.59	17	35	R	IKGDAKGGSDLNFGTYGLK	A		2	1	ZP_01001673.1
F056010	O. batsensis HTCC2597	96	485.809	1.99585	969.604	969.604	-0.442448	52.42	120	128	R	LAAMKLPVK	T		1	4	ZP_01001673.1
F056010	O. batsensis HTCC2597	1423	804.391	1.9975	1606.77	1606.77	0.964671	82.2	102	115	R	VMFEIDGVNEDIAR	E		0	2	ZP_01001673.1
F056010	O. batsensis HTCC2597	2824	693.018	2.99564	2076.03	2076.03	1.16183	28.9	102	119	R	VMFEIDGVNEDIAREALR	L		1	2	ZP_01001673.1
F056010	O. batsensis HTCC2597	40	451.74	1.99554	901.465	901.466	-0.362743	25.58	131	137	R	VVVREDW	-		1	2	ZP_01001673.1
F056010	O. batsensis HTCC2597	126	498.274	1.99596	994.534	994.534	0.14077	39.08	44	52	K	ALTDLTFSK	K		0	2	ZP_01001675.1
F056010	O. batsensis HTCC2597	4179	1052.85	2.99713	3155.53	3155.52	2.81095	40.6	62	90	K	CLQSAIANAENNHNLDVDDLIVAEAYVGK	N		0	1	ZP_01001675.1
F056010	O. batsensis HTCC2597	623	436.252	2.99307	1305.73	1305.74	-1.87327	39	108	118	R	IMKPFSELTIK	V		0	3	ZP_01001675.1
F056010	O. batsensis HTCC2597	672	441.584	2.99316	1321.73	1321.73	-0.124836	39.74	108	118	R	IMKPFSELTIK	V	Oxidation (M) [2]	0	2	ZP_01001675.1
F056010	O. batsensis HTCC2597	170	520.335	1.99613	1038.66	1038.65	0.105906	46.78	29	37	K	LNLVAQLIR	G		0	1	ZP_01001675.1
F056010	O. batsensis HTCC2597	1345	527.654	2.99427	1579.94	1579.94	-0.301277	59.82	24	37	R	TSPQKLNLVAQLIR	G		1	4	ZP_01001675.1
F056010	O. batsensis HTCC2597	74	470.73	1.99572	939.445	939.445	-0.202247	52.98	71	78	K	FGEFSPTR	T		0	2	ZP_01001676.1
F056010	O. batsensis HTCC2597	1246	518.264	2.99417	1551.77	1551.77	0.0915083	58.32	57	70	K	HVPVNVSEDMIGQK	F		0	4	ZP_01001676.1
F056010	O. batsensis HTCC2597	3533	619.309	3.99349	2473.21	2473.21	-0.126556	41.98	57	78	K	HVPVNVSEDMIGQKFGEFSPTR	T		1	4	ZP_01001676.1
F056010	O. batsensis HTCC2597	1301	523.596	2.99423	1567.77	1567.77	0.0146706	40.33	57	70	K	HVPVNVSEDMIGQK	F	Oxidation (M) [10]	0	2	ZP_01001676.1
F056010	O. batsensis HTCC2597	2776	1035.06	1.99805	2068.1	2068.1	0.0473865	63.62	38	56	R	STILPQFVGLTFGVYNGQK	H		0	4	ZP_01001676.1
F056010	O. batsensis HTCC2597	2026	450.252	3.99105	1796.98	1796.98	0.0228161	15.32	5	19	K	AEHYDVIRKPVITEK	A		1	1	ZP_01001678.1
F056010	O. batsensis HTCC2597	187	531.795	1.99621	1061.58	1061.58	0.705555	22.34	44	53	K	EAVEALFGVK	V		0	1	ZP_01001678.1
F056010	O. batsensis HTCC2597	2836	695.388	2.99565	2083.14	2083.14	0.395556	31.15	2	19	M	SAKAEHYDVIRKPVITEK	A		2	2	ZP_01001678.1
F056010	O. batsensis HTCC2597	3552	828.787	2.99635	2483.34	2483.34	-0.0370469	47.29	164	187	K	AAANIDGLDVLPSVGANVYDILKR	D		1	2	ZP_01001679.1
F056010	O. batsensis HTCC2597	2910	706.043	2.99572	2115.11	2115.11	0.610371	31.39	119	139	K	EGSLVIIDAAESEGKTNALAK	Q		1	2	ZP_01001679.1
F056010	O. batsensis HTCC2597	3010	724.37	2.99583	2170.09	2170.09	-0.430858	37.56	12	30	K	AFDYRVLDTSTQEIVNTAK	R		1	2	ZP_01001681.1
F056010	O. batsensis HTCC2597	848	466.273	2.99352	1395.8	1395.8	-0.432727	16.13	49	60	K	FTVLRGPHVDKK	S		2	1	ZP_01001681.1
F056010	O. batsensis HTCC2597	396	402.58	2.99249	1204.72	1204.72	0.95126	18.64	38	48	R	GPIPLPNKIEK	F		1	2	ZP_01001681.1
F056010	O. batsensis HTCC2597	2210	935.006	1.99785	1868	1868	0.29015	68.54	73	89	R	LLDIVDPTPQTVDALMK	L		0	3	ZP_01001681.1
F056010	O. batsensis HTCC2597	1159	759.905	1.99735	1517.8	1517.79	1.54632	80.36	17	30	R	VLDTSTQEIVNTAK	R		0	2	ZP_01001681.1
F056010	O. batsensis HTCC2597	1654	837.956	1.9976	1673.9	1673.89	1.9368	95.23	17	31	R	VLDTSTQEIVNTAKR	T		1	3	ZP_01001681.1
F056005	P. bermudensis HTCC2601	2696	976.476	1.99794	1950.94	1950.94	1.43213	84.06	195	213	R	CGAYANILAAITQVAEESA	-		0	4	ZP_01441032.1
F056005	P. bermudensis HTCC2601	1194	490.276	2.99384	1467.81	1467.8	2.14742	15.95	199	211	R	AIDETGVLEPLRR	F		1	2	ZP_01441034.1
F056005	P. bermudensis HTCC2601	5595	960.991	3.99581	3839.94	3839.93	2.64641	31.74	197	230	K	ALPAEVLAEMAKTDELELCYVHLQSLNNLTPMAR	R		1	1	ZP_01441140.1
F056005	P. bermudensis HTCC2601	4388	874.424	2.99654	2620.25	2620.24	3.2955	73.47	69	92	R	ANENNAVDAEGNWTGGYVPAFLRR	Y		1	2	ZP_01441140.1
F056005	P. bermudensis HTCC2601	2723	654.329	2.99538	1959.97	1959.96	1.81789	30.8	146	160	R	EYQGLFDRTQLFCKR	L		2	2	ZP_01441140.1
F056005	P. bermudensis HTCC2601	2520	943.938	1.99787	1885.86	1885.85	3.48277	76.03	232	251	R	IAASQAAAPEADEAAVSEDA	-		0	2	ZP_01441140.1
F056005	P. bermudensis HTCC2601	2974	1021.99	1.99803	2041.96	2041.96	0.128798	87.55	231	251	R	RIAASQAAAPEADEAAVSEDA	-		1	2	ZP_01441140.1
F056005	P. bermudensis HTCC2601	645	630.819	1.99681	1259.62	1259.62	1.47187	41.06	136	145	R	YLESMLTFTR	E		0	2	ZP_01441140.1
F056005	P. bermudensis HTCC2601	78	450.243	1.99553	898.471	898.47	1.02953	26.63	93	99	R	YPFVFAR	S		0	2	ZP_01441140.1
F056005	P. bermudensis HTCC2601	3363	1095.59	1.99816	2189.16	2189.16	2.51421	61.42	79	99	R	AILVTAADDVHEDIEPLAVAK	L		0	3	ZP_01441399.1
F056005	P. bermudensis HTCC2601	2640	647.037	2.99533	1938.09	1938.09	1.19654	62.08	100	117	K	LLAAIVKEEEPGLVICGK	Q		1	3	ZP_01441399.1
F056005	P. bermudensis HTCC2601	2367	926.437	1.99783	1850.86	1850.85	2.38539	97.72	29	44	K	MSMNPFDEIAVEEAIR	L		0	2	ZP_01441399.1
F056005	P. bermudensis HTCC2601	5067	766.402	3.99474	3061.58	3061.58	1.41039	31.86	70	99	R	TGLAMGADRAILVTAADDVHEDIEPLAVAK	L		1	2	ZP_01441399.1
F056005	P. bermudensis HTCC2601	222	518.779	1.99612	1035.54	1035.54	1.91301	29.84	185	193	R	YASLPNIMK	A		0	1	ZP_01441399.1
F056005	P. bermudensis HTCC2601	270	530.804	1.9962	1059.59	1059.59	1.91206	48.64	15	24	R	IAVLTVSDSR	S		0	1	ZP_01441504.1
F056005	P. bermudensis HTCC2601	1047	706.897	1.99715	1411.78	1411.78	0.645994	63.58	102	116	K	AGGGDLGGLVQSILR	A		0	4	ZP_01441515.1
F056005	P. bermudensis HTCC2601	1285	754.857	1.99733	1507.7	1507.7	0.898721	51.07	2	14	M	ADTMQFDLVSPER	S		0	2	ZP_01441518.1
F056005	P. bermudensis HTCC2601	3719	779.733	2.99612	2336.18	2336.17	3.32767	24.8	2	22	M	ADTMQFDLVSPERSLLSTQAK	T		1	1	ZP_01441518.1
F056005	P. bermudensis HTCC2601	2845	1000.97	1.99799	1999.93	1999.92	2.87762	63.93	82	98	R	AVPYADMTQETYEDLVR	E		0	2	ZP_01441518.1
F056005	P. bermudensis HTCC2601	2613	642.982	2.9953	1925.92	1925.92	0.920598	37.98	106	123	K	KVVEETENEPGPVDDAAK	L		1	2	ZP_01441518.1
F056005	P. bermudensis HTCC2601	3488	750.399	2.99597	2248.18	2248.17	3.97524	40.86	124	144	K	LLQDMVAVGGHIGLDPKQPNF	-		1	2	ZP_01441518.1
F056005	P. bermudensis HTCC2601	2214	899.922	1.99776	1797.83	1797.83	1.33773	57.74	107	123	K	VVEETENEPGPVDDAAK	L		0	1	ZP_01441518.1
F056005	P. bermudensis HTCC2601	4393	875.117	2.99655	2622.33	2622.32	4.14481	40.36	110	133	R	AIHQPAPEFDEQATDTEILVTGIK	V		0	2	ZP_01441519.1
F056005	P. bermudensis HTCC2601	2893	1009.02	1.998	2016.02	2016.02	2.52528	54.46	334	352	R	AISELGIYPAVDPLDSNSR	I		0	2	ZP_01441519.1
F056005	P. bermudensis HTCC2601	417	576.308	1.9965	1150.6	1150.6	0.159916	31.86	409	418	R	FLSQPFDVAK	V		0	2	ZP_01441519.1
F056005	P. bermudensis HTCC2601	5233	1086.89	2.99722	3257.66	3257.65	2.30657	53.25	409	438	R	FLSQPFDVAKVFTGSDGVQVPLEDTISSFK	A		1	2	ZP_01441519.1
F056005	P. bermudensis HTCC2601	3721	1171.58	1.99828	2341.15	2341.14	3.28685	76.35	89	109	R	ILNVVGEPVDEQGPVEAEEYR	A		0	2	ZP_01441519.1
F056005	P. bermudensis HTCC2601	4528	906.142	2.99667	2715.41	2715.4	1.85903	50.59	379	402	K	SLQDIIAILGMDELSEEDKLTVQR	A		1	1	ZP_01441519.1
F056005	P. bermudensis HTCC2601	5420	882.214	3.99543	3524.83	3524.81	3.86176	17.93	55	88	R	TIAMDSTEGLVRGQEVVDTDKPISVPVGNATLGR	I		1	1	ZP_01441519.1
F056005	P. bermudensis HTCC2601	3216	1063.54	1.99811	2125.06	2125.06	2.58581	60.42	419	438	K	VFTGSDGVQVPLEDTISSFK	A		0	2	ZP_01441519.1
F056005	P. bermudensis HTCC2601	5003	752.647	3.99465	3006.56	3006.56	-0.335267	24.85	377	402	R	YKSLQDIIAILGMDELSEEDKLTVQR	A		2	1	ZP_01441519.1
F056005	P. bermudensis HTCC2601	3260	1075.05	1.99813	2148.09	2148.08	4.82431	103.52	229	249	R	GVSTQIFSALLENAASEQGAR	M		0	4	ZP_01441520.1
F056005	P. bermudensis HTCC2601	2508	942.52	1.99786	1883.03	1883.03	0.60116	58.26	276	293	R	QAVITNELIEIISGAEAL	-		0	2	ZP_01441520.1
F056005	P. bermudensis HTCC2601	1483	783.439	1.99743	1564.86	1564.86	3.40798	62.36	91	106	R	TNSIVDVPAGPGLLGR	V		0	1	ZP_01441521.1
F056005	P. bermudensis HTCC2601	1267	501.605	2.99398	1501.79	1501.79	1.43229	34.63	173	186	R	AKLNSLQNAMKEVG	-		2	2	ZP_01441522.1
F056005	P. bermudensis HTCC2601	1088	475.267	2.99364	1422.78	1422.78	1.24194	49.86	79	91	K	ALHNALGLMAEKR	R		1	2	ZP_01441522.1
F056005	P. bermudensis HTCC2601	448	582.791	1.99654	1163.57	1163.56	3.063	46.34	51	60	R	DMISSPVYPR	Q		0	2	ZP_01441522.1
F056005	P. bermudensis HTCC2601	4584	912.794	2.99669	2735.36	2735.35	2.88884	45.25	105	131	R	EMIAVEKGEVTAEVTSATALSDAQASK	L		1	2	ZP_01441522.1
F056005	P. bermudensis HTCC2601	1216	492.287	2.99386	1473.84	1473.84	-0.113988	19.37	132	145	K	LAETLKSSVGKDVK	I		2	1	ZP_01441522.1
F056005	P. bermudensis HTCC2601	1028	469.296	2.99356	1404.86	1404.86	2.94478	25.67	93	104	R	LFVLPHLVAQLR	E		0	2	ZP_01441522.1
F056005	P. bermudensis HTCC2601	2267	604.656	2.995	1810.95	1810.94	2.24082	36.9	74	90	K	MGLDKALHNALGLMAEK	R		1	2	ZP_01441522.1
F056005	P. bermudensis HTCC2601	2747	492.77	3.99182	1967.05	1967.04	2.68321	52	74	91	K	MGLDKALHNALGLMAEKR	R		2	3	ZP_01441522.1
F056005	P. bermudensis HTCC2601	602	623.326	1.99677	1244.64	1244.64	1.44701	67.36	2	14	M	SEPASISSGIAAR	Y		0	2	ZP_01441522.1
F056005	P. bermudensis HTCC2601	1063	708.902	1.99716	1415.79	1415.79	1.46773	60.78	148	161	K	STVDESLIGGLVVK	V		0	2	ZP_01441522.1
F056005	P. bermudensis HTCC2601	2178	596.677	2.99494	1787.01	1787	2.53385	33.65	148	165	K	STVDESLIGGLVVKVGSK	M		1	2	ZP_01441522.1
F056005	P. bermudensis HTCC2601	5607	967.482	3.99584	3865.9	3865.89	3.40646	17.21	15	50	R	YATAIFDIAKENNSVGKLESDTDDLAQALADSPDLR	D		2	1	ZP_01441522.1
F056005	P. bermudensis HTCC2601	732	643.861	1.99687	1285.71	1285.71	0.822894	46.18	250	261	R	ILLGQAADQVMK	C		0	2	ZP_01441537.1
F056005	P. bermudensis HTCC2601	5171	1060.91	2.99715	3179.72	3179.71	2.62571	34.61	437	467	R	VYKVAEALEYGIVGVNTGIISTEVAPFGGVK	Q		1	2	ZP_01441537.1
F056005	P. bermudensis HTCC2601	4269	852.119	2.99645	2553.34	2553.33	3.88944	30.53	35	58	R	YAGRTDVMLTLLDPGTTVAGVFTR	S		1	2	ZP_01441551.1
F056005	P. bermudensis HTCC2601	3101	1039.55	1.99806	2077.09	2077.09	2.73412	20.95	78	96	R	APVTVPDDLPNLVEQMLAR	R		0	1	ZP_01441555.1
F056005	P. bermudensis HTCC2601	188	502.762	1.99599	1003.51	1003.51	0.36472	51.31	87	95	R	FTAEGLNPR	K		0	1	ZP_01441567.1
F056005	P. bermudensis HTCC2601	711	642.362	1.99686	1282.71	1282.71	1.98954	42.52	49	60	K	AALLAAQPELMR	G		0	2	ZP_01441611.1
F056005	P. bermudensis HTCC2601	767	650.359	1.9969	1298.7	1298.7	2.02818	34.73	49	60	K	AALLAAQPELMR	G	Oxidation (M) [11]	0	2	ZP_01441611.1
F056005	P. bermudensis HTCC2601	4730	932.827	2.99676	2795.46	2795.45	3.8645	54.12	34	60	R	KVEEAIASGDQDAAKAALLAAQPELMR	G		2	4	ZP_01441611.1
F056005	P. bermudensis HTCC2601	2238	902.923	1.99777	1803.83	1803.83	1.72356	70.45	1	15	-	MNAMQISEYAQSLYR	A		0	2	ZP_01441612.1
F056005	P. bermudensis HTCC2601	3048	1031.53	1.99805	2061.04	2061.03	4.60692	75.91	111	129	R	GLSGDLMSTEEEALLDLIR	A		0	4	ZP_01441648.1
F056005	P. bermudensis HTCC2601	2965	679.674	2.99555	2036	2036	1.47839	38.05	207	223	R	QWLGENLGYVAMQMLQR	-		0	2	ZP_01441648.1
F056005	P. bermudensis HTCC2601	1886	842.928	1.99761	1683.84	1683.84	3.13392	42.08	142	155	R	YLTPEDVTEVVTYR	C		0	2	ZP_01441648.1
F056005	P. bermudensis HTCC2601	1930	851.885	1.99764	1701.76	1701.76	0.272072	108.1	126	142	R	EGAADVYAYLASLGGDM	-		0	2	ZP_01441651.1
F056005	P. bermudensis HTCC2601	1974	859.885	1.99766	1717.76	1717.75	2.99461	87.99	126	142	R	EGAADVYAYLASLGGDM	-	Oxidation (M) [17]	0	2	ZP_01441651.1
F056005	P. bermudensis HTCC2601	2760	986.481	1.99796	1970.95	1970.94	3.39838	45.13	124	142	K	LREGAADVYAYLASLGGDM	-		1	2	ZP_01441651.1
F056005	P. bermudensis HTCC2601	3058	1033.52	1.99805	2065.02	2065.01	3.78739	91.81	57	76	R	TGPNLYGIIGSEAGAVEDFR	Y		0	2	ZP_01441651.1
F056005	P. bermudensis HTCC2601	4103	622.075	3.99352	2484.27	2484.26	2.5899	41.69	57	79	R	TGPNLYGIIGSEAGAVEDFRYKK	S		2	2	ZP_01441651.1
F056005	P. bermudensis HTCC2601	5476	911.687	3.99558	3642.72	3642.71	3.48614	28.83	44	77	R	DDTARDFEVIEGGPDHDIIDHVPENSPAAEALAK	M		1	2	ZP_01441655.1
F056005	P. bermudensis HTCC2601	3759	789.078	2.99617	2364.21	2364.21	2.85424	36.97	148	168	R	ELSLVDATFDDTERLAEITVK	Y		1	2	ZP_01441655.1
F056005	P. bermudensis HTCC2601	1863	560.623	2.99461	1678.85	1678.84	1.94181	46.91	80	95	K	RAEPSFGVGEFLSGAR	G		1	1	ZP_01441655.1
F056005	P. bermudensis HTCC2601	4836	953.15	2.99683	2856.43	2856.42	3.59331	55.96	2	28	M	AEEATQNGEAGAQQAPVKMNVLAQFVR	D		1	2	ZP_01441657.1
F056005	P. bermudensis HTCC2601	3285	1084.05	1.99814	2166.08	2166.08	0.689263	79.23	132	150	R	DGGFPPLNLEMIDFVALYR	N		0	2	ZP_01441657.1
F056005	P. bermudensis HTCC2601	692	639.342	1.99685	1276.67	1276.67	2.78695	58.73	29	39	R	DLSFENILAQK	G		0	2	ZP_01441657.1
F056005	P. bermudensis HTCC2601	72	441.24	1.99543	880.465	880.463	2.18862	33	117	123	R	MIFPFAR	R		0	2	ZP_01441657.1
F056005	P. bermudensis HTCC2601	299	539.298	1.99626	1076.58	1076.58	1.82987	59.86	20	28	K	MNVLAQFVR	D		0	2	ZP_01441657.1
F056005	P. bermudensis HTCC2601	2781	990.538	1.99797	1979.06	1979.06	2.27735	65.64	163	181	R	TSITDPNAVVLTIGELTHV	-		0	2	ZP_01441666.1
F056005	P. bermudensis HTCC2601	3667	772.731	2.99609	2315.17	2315.17	1.30012	55.06	212	233	R	DQMGTLLDLAESGVAQLVEAQK	A		0	2	ZP_01441671.1
F056005	P. bermudensis HTCC2601	3934	808.775	2.99626	2423.3	2423.3	0.13659	29.5	92	114	R	ALGVAREENAADALIEGIELTLR	E		1	2	ZP_01441673.1
F056005	P. bermudensis HTCC2601	897	452.242	2.99332	1353.71	1353.7	0.728372	20.13	81	91	R	DLLPVYDNLHR	A		0	1	ZP_01441673.1
F056005	P. bermudensis HTCC2601	5342	845.907	3.99524	3379.6	3379.6	0.213931	21.72	123	153	K	HGMTTISPQVGDKFDPQQHEAMFEAPVPGTK	A		1	2	ZP_01441673.1
F056005	P. bermudensis HTCC2601	1308	756.916	1.99734	1511.82	1511.81	3.21468	40.7	171	185	R	LLRPAQVGVSSMPAS	-		0	2	ZP_01441673.1
F056005	P. bermudensis HTCC2601	3446	744.401	2.99594	2230.18	2230.18	0.00403555	20.96	49	71	R	EAAGAPALQLDAKLNAAAATHAR	D		1	1	ZP_01441697.1
F056005	P. bermudensis HTCC2601	1290	755.884	1.99733	1509.75	1509.75	2.75079	57.49	36	48	K	IEYSMLDSVNALR	E		0	2	ZP_01441697.1
F056005	P. bermudensis HTCC2601	5090	1541.74	1.99869	3081.46	3081.45	4.10229	108.37	102	128	R	LVGENISETYETELETLAAWMEEPATR	N		0	4	ZP_01441697.1
F056005	P. bermudensis HTCC2601	174	499.785	1.99597	997.555	997.556	-0.571397	26.58	129	137	R	NVILEPSAR	D		0	2	ZP_01441697.1
F056005	P. bermudensis HTCC2601	4463	890.134	2.99661	2667.38	2667.37	3.85548	45.5	25	48	R	VYRIPAGSDAKIEYSMLDSVNALR	E		2	2	ZP_01441697.1
F056005	P. bermudensis HTCC2601	3947	809.431	2.99627	2425.27	2425.27	-0.112152	27.74	107	130	R	EAALAAMAPVIAEMVGELGAEKVR	A		1	2	ZP_01441704.1
F056005	P. bermudensis HTCC2601	651	632.816	1.99682	1263.62	1263.62	0.606196	47.81	96	106	K	ASLESWIKEAM	-		1	2	ZP_01441713.1
F056005	P. bermudensis HTCC2601	2479	938.523	1.99785	1875.03	1875.03	3.21436	75.86	73	89	R	GIPALFLFKDGEVISNR	T		1	4	ZP_01441713.1
F056005	P. bermudensis HTCC2601	1947	853.455	1.99764	1704.89	1704.89	2.17961	87.48	57	72	K	INVDHDQAVAAQLGVR	G		0	4	ZP_01441713.1
F056005	P. bermudensis HTCC2601	2901	673.355	2.99551	2017.04	2017.04	2.44368	46.13	36	53	K	QIGPALEELSEQYEGKVK	V		1	2	ZP_01441713.1
F056005	P. bermudensis HTCC2601	2855	668.704	2.99548	2003.09	2003.09	-0.671462	65.83	54	72	K	VAKINVDHDQAVAAQLGVR	G		1	4	ZP_01441713.1
F056005	P. bermudensis HTCC2601	987	697.831	1.99711	1393.65	1393.65	0.188713	89.51	36	49	R	GFEVETADSVAGGR	A		0	2	ZP_01441722.1
F056005	P. bermudensis HTCC2601	2615	643.302	2.9953	1926.88	1926.88	2.64573	21.81	131	147	R	EVMSSGHFLDQLLAHDE	-		0	2	ZP_01441903.1
F056005	P. bermudensis HTCC2601	1271	501.616	2.99398	1501.83	1501.83	1.2092	23.55	51	64	R	AHLTEPTAHTALIK	M		0	2	ZP_01441913.1
F056005	P. bermudensis HTCC2601	3033	1028.54	1.99804	2055.07	2055.06	4.70887	91	96	115	R	DVLEPLALEVNDAAMAGLSK	K		0	1	ZP_01441913.1
F056005	P. bermudensis HTCC2601	4395	875.471	2.99655	2623.39	2623.39	1.37951	49.78	91	115	K	GLELRDVLEPLALEVNDAAMAGLSK	K		1	2	ZP_01441913.1
F056005	P. bermudensis HTCC2601	90	455.768	1.99558	909.521	909.522	-0.409006	27.95	123	130	R	HALAVMIR	N		0	2	ZP_01441913.1
F056005	P. bermudensis HTCC2601	877	672.849	1.99701	1343.68	1343.68	0.668312	27.75	35	45	R	ILWQEDGLSQR	E		0	1	ZP_01441913.1
F056005	P. bermudensis HTCC2601	4624	688.879	3.99415	2751.49	2751.48	1.04925	33.68	90	115	R	KGLELRDVLEPLALEVNDAAMAGLSK	K		2	2	ZP_01441913.1
F056005	P. bermudensis HTCC2601	5052	761.648	3.99471	3042.56	3042.56	2.42921	22.97	68	95	K	LYRQPVAYFIGEDDAAGSLPVDVAHLAR	Q		1	1	ZP_01441982.1
F056005	P. bermudensis HTCC2601	2186	597.658	2.99494	1789.95	1789.95	3.84928	32.62	23	39	R	DALADKGFGVLTEIDVK	A		1	2	ZP_01442047.1
F056005	P. bermudensis HTCC2601	334	551.791	1.99635	1101.57	1101.57	0.416679	31.72	119	128	R	DLLRDALDTA	-		1	1	ZP_01442047.1
F056005	P. bermudensis HTCC2601	901	678.88	1.99703	1355.75	1355.74	2.44737	37.62	74	85	R	IGAMLPCNVILR	Q		0	2	ZP_01442047.1
F056005	P. bermudensis HTCC2601	229	347.221	2.9913	1038.64	1038.64	-1.31518	24.48	28	37	R	LGVKPPTVTK	N		0	2	ZP_01442056.1
F056005	P. bermudensis HTCC2601	624	625.332	1.99678	1248.65	1248.65	3.20988	63.37	28	40	R	AGIGAGSGYLIDR	A		0	6	ZP_01442080.1
F056005	P. bermudensis HTCC2601	5675	1337.97	2.99774	4010.89	4010.87	4.30205	132.92	28	69	R	AGIGAGSGYLIDRAVGGDGTVGAAVGATAGVVCDDVTPQYCN	-		1	3	ZP_01442080.1
F056005	P. bermudensis HTCC2601	4694	1391.13	1.99855	2780.25	2780.24	3.31374	97.88	41	69	R	AVGGDGTVGAAVGATAGVVCDDVTPQYCN	-		0	6	ZP_01442080.1
F056005	P. bermudensis HTCC2601	2915	1011.04	1.99801	2020.07	2020.06	4.23304	32.8	51	70	R	GLYLEAIAIDPAAPPPEGAR	W		0	1	ZP_01442087.1
F056005	P. bermudensis HTCC2601	2920	675.023	2.99552	2022.05	2022.04	2.38521	47.98	50	67	R	TAWHTHPAGQTIIITYGR	G		0	3	ZP_01442144.1
F056005	P. bermudensis HTCC2601	5695	1353.35	2.99777	4057.02	4057.02	1.11732	52.23	212	248	K	QIAIPASTMADMVSFAISQPENVDVNEILFRPTVQPE	-		0	4	ZP_01442151.1
F056005	P. bermudensis HTCC2601	1045	471.583	2.99359	1411.73	1411.73	-0.0871273	18.92	197	208	R	TPLDLYARPHMV	-		0	2	ZP_01442200.1
F056005	P. bermudensis HTCC2601	230	520.781	1.99613	1039.55	1039.55	1.51412	45.18	2	10	M	SLFGFSLNR	R		0	2	ZP_01442210.1
F056005	P. bermudensis HTCC2601	1556	795.426	1.99747	1588.84	1588.83	2.01972	55.04	12	26	K	FLVAELPSLDGVDSK	K		0	2	ZP_01442215.1
F056005	P. bermudensis HTCC2601	1391	767.898	1.99738	1533.78	1533.78	2.15155	40.95	30	43	R	QGYVTVPSDSVQVR	L		0	2	ZP_01442215.1
F056005	P. bermudensis HTCC2601	389	567.29	1.99645	1132.57	1132.56	2.94377	41.24	259	267	R	FTVTFMYPK	-		0	2	ZP_01442225.1
F056005	P. bermudensis HTCC2601	1560	796.395	1.99747	1590.78	1590.77	2.62891	57.19	104	117	K	GYGDIVQSFFFSPK	E		0	2	ZP_01442225.1
F056005	P. bermudensis HTCC2601	2386	928.014	1.99783	1854.01	1854.01	1.72113	43.69	86	103	R	TIIPAISQTDVVPGSTQK	G		0	1	ZP_01442225.1
F056005	P. bermudensis HTCC2601	1415	771.929	1.99739	1541.84	1541.84	1.09869	83.27	227	242	K	VTTIGDTPVSIGAGVR	Y		0	2	ZP_01442225.1
F056005	P. bermudensis HTCC2601	1775	550.258	2.99451	1647.75	1647.75	-0.398118	21.69	49	64	R	AMNDAADESGVRDVAK	T		1	2	ZP_01442238.1
F056005	P. bermudensis HTCC2601	3450	745.701	2.99595	2234.08	2234.08	0.444478	37.89	58	77	K	GHYAFLKTDAPATAVQEMER	L		1	4	ZP_01442243.1
F056005	P. bermudensis HTCC2601	3757	788.401	2.99617	2362.18	2362.17	2.8097	62.75	57	77	R	KGHYAFLKTDAPATAVQEMER	L		2	2	ZP_01442243.1
F056005	P. bermudensis HTCC2601	717	429.221	2.99296	1284.64	1284.64	-1.01974	21.69	78	87	R	LMRLHDDVMR	V		1	1	ZP_01442243.1
F056005	P. bermudensis HTCC2601	600	622.845	1.99677	1243.68	1243.67	2.99275	56.85	2	11	M	PLYEHVFIAR	Q		0	4	ZP_01442243.1
F056005	P. bermudensis HTCC2601	4326	862.755	2.9965	2585.24	2585.24	2.74366	39.09	12	36	R	QDLSNAQAEGLVEHFGTVLSDNGGK	V		0	2	ZP_01442243.1
F056005	P. bermudensis HTCC2601	1074	709.834	1.99716	1417.65	1417.65	2.48439	68.26	65	77	K	TDAPATAVQEMER	L		0	2	ZP_01442243.1
F056005	P. bermudensis HTCC2601	1437	518.912	2.99418	1553.71	1553.71	-0.340474	23.52	93	106	K	VDEHAEGPSVQMQK	R		0	2	ZP_01442243.1
F056005	P. bermudensis HTCC2601	3174	703.706	2.99571	2108.1	2108.09	1.51322	59.39	88	106	R	VLTIKVDEHAEGPSVQMQK	R		1	2	ZP_01442243.1
F056005	P. bermudensis HTCC2601	3537	567.056	3.99289	2264.2	2264.19	0.622296	29.67	88	107	R	VLTIKVDEHAEGPSVQMQKR	D		2	1	ZP_01442243.1
F056005	P. bermudensis HTCC2601	443	581.865	1.99654	1161.72	1161.72	-0.0929659	44.62	66	75	R	FLALLPYVVK	-		0	2	ZP_01442244.1
F056005	P. bermudensis HTCC2601	986	464.933	2.9935	1391.78	1391.78	-0.0467029	25.11	23	33	K	IDYKDTKLLQR	Y		2	2	ZP_01442244.1
F056005	P. bermudensis HTCC2601	593	621.383	1.99676	1240.75	1240.75	0.921217	36.02	41	52	K	IVPSRITAVSAK	K		1	1	ZP_01442244.1
F056005	P. bermudensis HTCC2601	497	596.277	1.99662	1190.54	1190.54	0.0260386	18.68	12	22	K	VCPFSGDNAPK	I		0	2	ZP_01442244.1
F056005	P. bermudensis HTCC2601	2106	586.644	2.99485	1756.91	1756.91	0.182707	33.53	36	51	K	ALTASKENIAHFEAQK	A		1	2	ZP_01442245.1
F056005	P. bermudensis HTCC2601	3951	809.432	2.99627	2425.27	2425.27	0.812693	65.93	36	57	K	ALTASKENIAHFEAQKAQLEAR	N		2	5	ZP_01442245.1
F056005	P. bermudensis HTCC2601	1996	575.278	2.99475	1722.81	1722.81	3.03342	32.89	97	112	R	DAADVATEEGFSIDRK	Q		1	2	ZP_01442245.1
F056005	P. bermudensis HTCC2601	1909	844.944	1.99762	1687.87	1687.87	1.33363	70.83	12	27	K	LGQMGDVVDVKPGFAR	N		0	4	ZP_01442245.1
F056005	P. bermudensis HTCC2601	1941	568.963	2.99469	1703.87	1703.87	0.0328664	49.85	12	27	K	LGQMGDVVDVKPGFAR	N	Oxidation (M) [4]	0	2	ZP_01442245.1
F056005	P. bermudensis HTCC2601	182	501.295	1.99598	1000.57	1000.57	0.533694	59.77	1	8	-	MQVILLER	V		0	2	ZP_01442245.1
F056005	P. bermudensis HTCC2601	769	433.932	2.99304	1298.77	1298.77	0.0562068	17.75	1	11	-	MQVILLERVAK	L		1	1	ZP_01442245.1
F056005	P. bermudensis HTCC2601	127	474.78	1.99576	947.546	947.544	2.38195	39.29	28	35	R	NYLLLQGK	A		0	2	ZP_01442245.1
F056005	P. bermudensis HTCC2601	1231	742.853	1.99729	1483.69	1483.69	0.903153	109.18	82	96	R	SASDGGNLYGSVTTR	D		0	2	ZP_01442245.1
F056005	P. bermudensis HTCC2601	2796	497.526	3.9919	1986.07	1986.07	0.409351	33.66	9	27	R	VAKLGQMGDVVDVKPGFAR	N		1	2	ZP_01442245.1
F056005	P. bermudensis HTCC2601	1198	735.365	1.99726	1468.71	1468.71	3.67942	32.81	117	130	K	AAPQAEQPLRATGC	-		1	1	ZP_01442246.1
F056005	P. bermudensis HTCC2601	5014	1007.14	2.997	3018.4	3018.39	2.14651	41.92	37	65	R	GTVEDVIGVPSASGVANDGGFYYIESEMR	H		0	2	ZP_01442271.1
F056005	P. bermudensis HTCC2601	2430	933.494	1.99784	1864.97	1864.97	2.21183	73.9	123	139	R	KLFGNIGGISLDQFTQQ	-		1	2	ZP_01442271.1
F056005	P. bermudensis HTCC2601	3751	785.723	2.99615	2354.15	2354.14	2.95182	42.31	16	36	R	THGYVPSEEDLQEIVPGIDTR	G		0	2	ZP_01442271.1
F056005	P. bermudensis HTCC2601	397	569.791	1.99646	1137.57	1137.57	0.741056	41.57	113	122	K	TTDGELSFIR	K		0	2	ZP_01442271.1
F056005	P. bermudensis HTCC2601	1114	716.877	1.99719	1431.74	1431.74	2.27277	34.24	96	108	R	YGLEDGNVVPLTR	R		0	1	ZP_01442271.1
F056005	P. bermudensis HTCC2601	5371	853.191	3.99528	3408.74	3408.73	1.46623	16.48	10	40	R	EVGLSRNESAELVESVLQHMSDALVRGEQVK	I		2	1	ZP_01442276.1
F056005	P. bermudensis HTCC2601	330	550.791	1.99634	1099.57	1099.57	1.29597	56.23	41	50	K	ISSFGTFSVR	D		0	2	ZP_01442276.1
F056005	P. bermudensis HTCC2601	281	534.264	1.99623	1066.51	1066.51	1.43365	58.32	1	9	-	MDLSEAVFR	E		0	1	ZP_01442276.1
F056005	P. bermudensis HTCC2601	367	563.298	1.99642	1124.58	1124.58	-1.00748	41.65	62	71	K	TGEEVPIQPR	R		0	2	ZP_01442276.1
F056005	P. bermudensis HTCC2601	2163	592.995	2.9949	1775.96	1775.96	0.0867135	46.37	56	71	R	VGRNPKTGEEVPIQPR	R		2	2	ZP_01442276.1
F056005	P. bermudensis HTCC2601	3306	726.074	2.99584	2175.2	2175.19	3.13443	36	59	78	R	IITAPDFTDGKVLGAILFER	T		1	2	ZP_01442306.1
F056005	P. bermudensis HTCC2601	1029	703.858	1.99714	1405.7	1405.7	0.00924805	27.21	129	141	K	LLDTEITMDATLA	-		0	1	ZP_01442311.1
F056005	P. bermudensis HTCC2601	3515	1129.53	1.99822	2257.04	2257.03	2.36771	75.37	59	79	K	HAISTIMPSQPINLYDGDGND	-		0	2	ZP_01442317.1
F056005	P. bermudensis HTCC2601	1641	807.949	1.99751	1613.88	1613.88	1.85268	70.31	37	52	R	ILAINLGTLGDMAQGK	T		0	2	ZP_01442332.1
F056005	P. bermudensis HTCC2601	3410	738.373	2.99591	2212.1	2212.1	0.307401	66.73	54	75	R	SAAQALGDEILAALEADEAQAR	V		0	2	ZP_01442336.1
F056005	P. bermudensis HTCC2601	4818	1425.17	1.99859	2848.34	2848.34	-0.348625	104.07	136	161	R	EIAADDYFEGMFTTALEEGEIVTAVK	F		0	4	ZP_01442355.1
F056005	P. bermudensis HTCC2601	5093	1031.18	2.99707	3090.51	3090.5	2.64002	67.16	104	135	R	GTIGGSLANNDPSACYPAAALASGATIVTNTR	E		0	2	ZP_01442355.1
F056005	P. bermudensis HTCC2601	326	549.351	1.99633	1096.69	1096.69	2.25315	49.71	41	51	R	LAAPSVLVSLK	N		0	2	ZP_01442355.1
F056005	P. bermudensis HTCC2601	5611	1293.67	2.99766	3877.98	3877.97	2.64958	41.06	1	38	-	MYSFEIESPTSVADAVAALGKEEAQALGGGQTLIPSLK	A		1	2	ZP_01442355.1
F056005	P. bermudensis HTCC2601	5318	1121.23	2.9973	3360.66	3360.65	2.41947	77.86	102	135	R	NRGTIGGSLANNDPSACYPAAALASGATIVTNTR	E		1	2	ZP_01442355.1
F056005	P. bermudensis HTCC2601	790	654.334	1.99692	1306.65	1306.65	1.91252	67.08	196	208	R	VAVTGASEDGVFR	W		0	2	ZP_01442355.1
F056005	P. bermudensis HTCC2601	1208	736.885	1.99727	1471.76	1471.75	2.19602	38.54	146	161	K	AILAASGQDVSGIAAE	-		0	2	ZP_01442358.1
F056005	P. bermudensis HTCC2601	1528	791.45	1.99745	1580.89	1580.88	2.57451	69.08	14	27	R	EVVWAAILDPEVLK	Q		0	2	ZP_01442359.1
F056005	P. bermudensis HTCC2601	4195	840.083	2.9964	2517.23	2517.22	1.10916	54.24	90	113	K	GGADVTLTDKGDGITELHYEVEAK	V		1	3	ZP_01442359.1
F056005	P. bermudensis HTCC2601	3137	699.051	2.99568	2094.13	2094.13	-0.834236	32.54	73	93	R	EAKPSVEAALAILGEALAEGR	E		0	2	ZP_01442371.1
F056005	P. bermudensis HTCC2601	3261	717.345	2.99579	2149.01	2149.01	-0.471844	37.89	121	141	R	LRQNAPQRPGSAGEGPEAAED	-		1	2	ZP_01442371.1
F056005	P. bermudensis HTCC2601	2499	940.921	1.99786	1879.83	1879.83	-1.04903	39.43	123	141	R	QNAPQRPGSAGEGPEAAED	-		0	2	ZP_01442371.1
F056005	P. bermudensis HTCC2601	1577	800.904	1.99748	1599.79	1599.79	2.0984	90.83	97	112	K	SASYGGLEIGSGTVRF	-		1	2	ZP_01442400.1
F056005	P. bermudensis HTCC2601	4377	872.795	2.99654	2615.36	2615.36	0.236296	30.93	128	152	R	AAYEGALSVDPEIIVMVLAATAQQR	A		0	2	ZP_01442409.1
F056005	P. bermudensis HTCC2601	1255	748.381	1.99731	1494.75	1494.75	0.0963374	55.92	11	24	R	LNSTAGTGHFYVTK	K		0	2	ZP_01442416.1
F056005	P. bermudensis HTCC2601	1679	812.428	1.99752	1622.84	1622.84	-0.500357	49.65	11	25	R	LNSTAGTGHFYVTKK	N		1	3	ZP_01442416.1
F056005	P. bermudensis HTCC2601	3526	754.394	2.99599	2260.16	2260.16	1.45167	31.07	23	46	R	DDVPAARPEAGAVAAQTAGAPGLR	A		0	2	ZP_01442427.1
F056005	P. bermudensis HTCC2601	4735	933.765	2.99676	2798.27	2798.27	1.09568	29.6	63	89	R	EGSDMMAERVAMMGGLAQGTTQTVAEK	S		1	1	ZP_01442431.1
F056005	P. bermudensis HTCC2601	427	578.312	1.99652	1154.61	1154.61	0.0433047	50.53	113	121	R	FNDYTVKLR	Q		1	4	ZP_01442431.1
F056005	P. bermudensis HTCC2601	3000	684.03	2.99558	2049.07	2049.06	1.85939	54.75	44	62	K	GTGFIGVHELLDDVTAHLR	E		0	4	ZP_01442431.1
F056005	P. bermudensis HTCC2601	5059	764.871	3.99473	3055.46	3055.45	2.53252	17.42	44	71	K	GTGFIGVHELLDDVTAHLREGSDMMAER	V		1	1	ZP_01442431.1
F056005	P. bermudensis HTCC2601	4513	902.759	2.99665	2705.26	2705.24	3.87839	67.87	120	144	K	LRQAMEAADEAGDEDTADLLTEVSR	N		1	2	ZP_01442431.1
F056005	P. bermudensis HTCC2601	1721	819.399	1.99754	1636.78	1636.78	-0.276151	82.48	145	159	R	NAEKDAWFIGSNSAK	A		1	3	ZP_01442431.1
F056005	P. bermudensis HTCC2601	1336	759.89	1.99735	1517.77	1517.76	2.36071	37.97	2	14	M	PQNFVPFLSENAR	T		0	2	ZP_01442431.1
F056005	P. bermudensis HTCC2601	3976	1219.04	1.99835	2436.07	2436.06	2.31275	153.81	122	144	R	QAMEAADEAGDEDTADLLTEVSR	N		0	4	ZP_01442431.1
F056005	P. bermudensis HTCC2601	411	574.294	1.99649	1146.57	1146.57	3.09706	45.66	15	24	R	TEMIGVLNDR	L		0	2	ZP_01442431.1
F056005	P. bermudensis HTCC2601	3898	804.427	2.99624	2410.26	2410.25	3.10258	58.7	15	36	R	TEMIGVLNDRLADTIDLSHAVK	Q		1	2	ZP_01442431.1
F056005	P. bermudensis HTCC2601	2194	896.954	1.99775	1791.89	1791.89	3.76028	88.32	72	89	R	VAMMGGLAQGTTQTVAEK	S		0	4	ZP_01442431.1
F056005	P. bermudensis HTCC2601	2245	904.949	1.99777	1807.88	1807.88	1.00615	105.65	72	89	R	VAMMGGLAQGTTQTVAEK	S	Oxidation (M) [3]	0	1	ZP_01442431.1
F056005	P. bermudensis HTCC2601	2246	904.949	1.99777	1807.88	1807.88	1.2274	91.39	72	89	R	VAMMGGLAQGTTQTVAEK	S	Oxidation (M) [4]	0	3	ZP_01442431.1
F056005	P. bermudensis HTCC2601	4246	847.765	2.99644	2540.27	2540.27	2.87293	29.51	2	24	M	GINTERDIEANLQIGPTDQAMVR	I		1	2	ZP_01442469.1
F056005	P. bermudensis HTCC2601	5457	1201.58	2.99749	3601.73	3601.72	0.72854	27.6	25	58	R	IFVAAGDAEIPMDFEPEEAEEIAEEIRAAAAAAR	K		1	2	ZP_01442469.1
F056005	P. bermudensis HTCC2601	2961	679.356	2.99555	2035.05	2035.04	1.39653	23.03	181	198	R	NFDMPFITEVVLAEIAAR	A		0	1	ZP_01442488.1
F056005	P. bermudensis HTCC2601	5421	1179.25	2.99744	3534.72	3534.7	4.14434	120.71	164	196	K	AFNAAYLEIQNDLGDPGFGPVASLDTERADVNR	L		1	1	ZP_01442515.1
F056005	P. bermudensis HTCC2601	1414	771.885	1.99739	1541.76	1541.75	1.07475	56.01	197	210	R	LAYVEAAQACFTAK	R		0	1	ZP_01442515.1
F056005	P. bermudensis HTCC2601	4707	697.87	3.99423	2787.45	2787.44	2.23179	27.8	138	163	K	SALKVYDQVLSLAEAHGKDTPEAFAK	A		2	2	ZP_01442515.1
F056005	P. bermudensis HTCC2601	113	465.27	1.99567	928.526	928.523	3.55295	32.08	41	48	R	DVQIVDLK	S		0	2	ZP_01442538.1
F056005	P. bermudensis HTCC2601	1690	812.968	1.99752	1623.92	1623.92	0.909528	53.27	69	83	R	GESVLPINVLTDLVR	S		0	2	ZP_01442538.1
F056005	P. bermudensis HTCC2601	2244	904.457	1.99777	1806.9	1806.9	0.563397	78.45	124	139	K	IPGFEAMQAQQEAFLK	A		0	2	ZP_01442538.1
F056005	P. bermudensis HTCC2601	4346	866.758	2.99651	2597.25	2597.24	3.60729	33.54	124	147	K	IPGFEAMQAQQEAFLKAMTGNMGK	Q		1	2	ZP_01442538.1
F056005	P. bermudensis HTCC2601	4438	883.434	2.99658	2647.28	2647.28	1.81545	27.13	18	40	R	LYNTETSDYVTLEDIAGFIRDGR	D		1	1	ZP_01442538.1
F056005	P. bermudensis HTCC2601	5026	1010.15	2.99701	3027.43	3027.43	0.918601	28.88	84	110	R	SYTTQATSSVPQFLAASFEMFRESQSK	W		1	2	ZP_01442538.1
F056005	P. bermudensis HTCC2601	1233	744.854	1.9973	1487.69	1487.69	1.5924	50.46	111	123	K	WAETVNANPMMPK	I		0	2	ZP_01442538.1
F056005	P. bermudensis HTCC2601	1805	553.3	2.99454	1656.88	1656.88	1.07914	38.41	36	50	R	LYDRLCALGPPAGVR	L		1	2	ZP_01442592.1
F056005	P. bermudensis HTCC2601	2954	1017.98	1.99802	2033.95	2033.94	2.78966	81.53	1	18	-	MQNDPQSSAESELLVCVK	C		0	1	ZP_01442592.1
F056005	P. bermudensis HTCC2601	5179	1064.53	2.99716	3190.57	3190.56	3.57398	28.04	101	127	R	SGDYVLVTVPQPYYEESEEIYIQQITK	A		0	1	ZP_01442610.1
F056005	P. bermudensis HTCC2601	690	638.358	1.99684	1274.7	1274.7	2.63592	71.58	77	88	K	EAIFSQVAVVGR	D		0	2	ZP_01442686.1
F056005	P. bermudensis HTCC2601	4925	728.129	3.99447	2908.49	2908.48	1.322	23.38	177	202	R	LRELGLEPYDCLSPPLMDAIATHVAK	Q		1	1	ZP_01442686.1
F056005	P. bermudensis HTCC2601	3237	713.376	2.99576	2137.11	2137.1	2.34009	24.6	93	111	K	VTEHEEKLEIVDASAAIQR	H		1	3	ZP_01442686.1
F056005	P. bermudensis HTCC2601	800	657.336	1.99694	1312.66	1312.66	1.50306	56.64	116	127	R	ADVIAYLATFTE	-		0	2	ZP_01442704.1
F056005	P. bermudensis HTCC2601	2756	657.663	2.99541	1969.97	1969.96	1.53049	16.59	111	127	R	KEDERADVIAYLATFTE	-		2	1	ZP_01442704.1
F056005	P. bermudensis HTCC2601	339	555.326	1.99637	1108.64	1108.64	1.75712	41.08	49	59	K	VGPQLNGIVGR	E		0	2	ZP_01442704.1
F056005	P. bermudensis HTCC2601	5440	1195.92	2.99747	3584.73	3584.73	-0.241023	70.79	144	177	R	GYPNNDPPEELNDEAAIAAVTGVYEAGLQALVER	F		0	2	ZP_01442711.1
F056005	P. bermudensis HTCC2601	4273	852.459	2.99646	2554.35	2554.35	3.03796	45.05	106	128	R	ITEVAVEVLPVTNYSSHLTVMPR	D		0	2	ZP_01442711.1
F056005	P. bermudensis HTCC2601	301	540.265	1.99627	1078.52	1078.52	1.27212	60.09	25	33	K	IAEIMTDMR	C		0	2	ZP_01442715.1
F056005	P. bermudensis HTCC2601	1477	783.395	1.99743	1564.78	1564.77	1.89357	77.17	159	173	K	ALLAGDGDEVSSIYR	E		0	2	ZP_01442728.1
F056005	P. bermudensis HTCC2601	2360	925.968	1.99782	1849.92	1849.92	2.30875	39.73	159	175	K	ALLAGDGDEVSSIYRER	V		1	2	ZP_01442728.1
F056005	P. bermudensis HTCC2601	4768	939.751	2.99678	2816.23	2816.23	2.05026	38.74	13	35	R	CIECNACVTACKNEHEVPWGINR	R		1	1	ZP_01442728.1
F056005	P. bermudensis HTCC2601	4089	827.36	2.99635	2479.06	2479.05	1.50017	46.28	119	140	K	CTFCAGGPEENTSAAEFQKYGR	N		1	2	ZP_01442728.1
F056005	P. bermudensis HTCC2601	2463	937.414	1.99785	1872.81	1872.81	3.47927	54.83	180	197	R	GFGSGAWGWGTAYDEKAN	-		1	2	ZP_01442728.1
F056005	P. bermudensis HTCC2601	2242	904.444	1.99777	1806.87	1806.87	3.35664	55.31	143	158	R	IAEGKLPICAEMCSTK	A		1	3	ZP_01442728.1
F056005	P. bermudensis HTCC2601	3098	693.346	2.99564	2077.01	2077.01	1.52238	28.26	141	158	R	NRIAEGKLPICAEMCSTK	A		2	2	ZP_01442728.1
F056005	P. bermudensis HTCC2601	766	649.839	1.9969	1297.66	1297.66	1.23684	55.57	38	49	R	VVTIQDGQPGER	S		0	2	ZP_01442728.1
F056005	P. bermudensis HTCC2601	3762	789.409	2.99617	2365.21	2365.2	1.64595	66.79	42	63	K	AVVTIEELGLTHEVDGEIKGQE	-		1	2	ZP_01442735.1
F056005	P. bermudensis HTCC2601	3800	792.722	2.99619	2375.14	2375.14	2.30934	26.51	15	36	K	QVGVTSQQAIEEAMREQDTAGK	T		1	2	ZP_01442735.1
F056005	P. bermudensis HTCC2601	333	551.719	1.99635	1101.42	1101.42	0.841639	42.04	2	10	M	SDDFNMSMR	K		0	1	ZP_01442735.1
F056005	P. bermudensis HTCC2601	810	658.883	1.99694	1315.75	1315.75	1.42808	18.29	152	163	R	AIADFILREVGL	-		1	1	ZP_01442742.1
F056005	P. bermudensis HTCC2601	2939	677.037	2.99554	2028.09	2028.08	2.50286	26	117	135	R	LLLAAEDAPHPLALACTPR	S		0	1	ZP_01442743.1
F056005	P. bermudensis HTCC2601	605	623.814	1.99677	1245.61	1245.61	0.716113	63.5	75	86	R	AVMTGQANIGER	L		0	2	ZP_01442798.1
F056005	P. bermudensis HTCC2601	3025	685.388	2.99559	2053.14	2053.14	3.02513	40.73	75	93	R	TLTDPERNALIVALAGIMR	A		1	2	ZP_01442823.1
F056005	P. bermudensis HTCC2601	2473	625.63	2.99517	1873.87	1873.87	-0.36502	23.51	65	81	K	ADDVRGQGEEMLRDAGR	R		2	2	ZP_01442831.1
F056005	P. bermudensis HTCC2601	1846	558.945	2.99459	1673.81	1673.82	-1.20623	25.42	63	77	K	AKADDVRGQGEEMLR	D		2	2	ZP_01442831.1
F056005	P. bermudensis HTCC2601	3556	758.76	2.99602	2273.26	2273.25	2.06664	36.8	96	118	R	ATPLQAVGIAAAAGFLLGYLNSR	R		0	3	ZP_01442831.1
F056005	P. bermudensis HTCC2601	3954	810.791	2.99627	2429.35	2429.35	-1.64941	22.57	96	119	R	ATPLQAVGIAAAAGFLLGYLNSRR	-		1	2	ZP_01442831.1
F056005	P. bermudensis HTCC2601	2159	592.969	2.9949	1775.88	1775.88	0.721331	20.18	37	53	R	GDLSALTEMVGDIGSRR	G		1	1	ZP_01442831.1
F056005	P. bermudensis HTCC2601	1653	809.422	1.99751	1616.83	1616.83	1.97362	62.49	82	95	R	RVADFEDQAIGQIR	A		1	2	ZP_01442831.1
F056005	P. bermudensis HTCC2601	1188	731.371	1.99725	1460.73	1460.73	1.57182	77.8	83	95	R	VADFEDQAIGQIR	A		0	2	ZP_01442831.1
F056005	P. bermudensis HTCC2601	3857	800.794	2.99623	2399.36	2399.36	0.807299	37.64	73	96	R	KVPAPPPPPATSIASLLEAFLAGR	A		1	2	ZP_01442832.1
F056005	P. bermudensis HTCC2601	3546	758.095	2.99601	2271.26	2271.26	0.612875	19.84	74	96	K	VPAPPPPPATSIASLLEAFLAGR	A		0	1	ZP_01442832.1
F056005	P. bermudensis HTCC2601	2045	580.613	2.9948	1738.82	1738.82	0.908089	26.16	36	51	R	EAFVPDSEKEAAYAGR	N		1	2	ZP_01442833.1
F056005	P. bermudensis HTCC2601	4943	975.802	2.9969	2924.38	2924.37	3.24958	21.3	162	187	R	ISVPPFVGQDEDIVVNTETMEYSERA	-		1	1	ZP_01442837.1
F056005	P. bermudensis HTCC2601	2429	622.346	2.99514	1864.02	1864.01	2.46779	36.81	123	138	R	KMVALLEYLESIQATR	-		1	2	ZP_01442850.1
F056005	P. bermudensis HTCC2601	5424	1180.26	2.99744	3537.76	3537.75	0.0732103	36.61	89	122	R	SDLDGPSMPEFGELLKGDLVPLDTGDGVLTPTPR	K		1	2	ZP_01442850.1
F056005	P. bermudensis HTCC2601	4070	825.74	2.99634	2474.2	2474.2	0.588474	40.76	67	89	R	EAELTNQLAQTEAELSAAMEGLR	E		0	2	ZP_01442864.1
F056005	P. bermudensis HTCC2601	568	614.297	1.99672	1226.58	1226.58	3.61902	38.51	110	121	R	AGGCGIPGFYTK	T		0	2	ZP_01442877.1
F056005	P. bermudensis HTCC2601	5340	845.677	3.99524	3378.68	3378.67	1.42778	27.9	185	213	K	ICVMEVEEIVEPGELDPDHIHLPGIFVHR	I		0	4	ZP_01442877.1
F056005	P. bermudensis HTCC2601	1791	826.35	1.99756	1650.69	1650.68	1.1159	88.46	74	87	K	MMSSYVGENAEFMR	Q		0	2	ZP_01442877.1
F056005	P. bermudensis HTCC2601	527	603.774	1.99666	1205.53	1205.53	0.757342	15.09	174	184	R	NFNPPAAMCGK	I		0	2	ZP_01442877.1
F056005	P. bermudensis HTCC2601	3600	1147.57	1.99824	2293.13	2293.12	2.1124	91.74	88	107	R	QYLSGELELEFNPQGTLAER	M		0	2	ZP_01442877.1
F056005	P. bermudensis HTCC2601	1058	708.889	1.99716	1415.76	1415.76	0.875147	56.67	122	135	K	TGVGTQIAEGKEVK	Q		1	3	ZP_01442877.1
F056005	P. bermudensis HTCC2601	1181	730.383	1.99724	1458.75	1458.75	0.655356	55.89	149	162	K	ACTLPLTGTGVVDR	I		0	2	ZP_01442878.1
F056005	P. bermudensis HTCC2601	5114	1038.9	2.99709	3113.68	3113.68	1.49405	41.42	149	178	K	ACTLPLTGTGVVDRIITNFGVLDVVEGGLK	I		1	3	ZP_01442878.1
F056005	P. bermudensis HTCC2601	741	645.819	1.99688	1289.62	1289.62	1.86721	80	117	130	K	GMGGAMDLVAGVGR	V		0	2	ZP_01442878.1
F056005	P. bermudensis HTCC2601	1844	837.48	1.99759	1672.94	1672.94	2.78611	75.37	163	178	R	IITNFGVLDVVEGGLK	I		0	2	ZP_01442878.1
F056005	P. bermudensis HTCC2601	1501	786.911	1.99744	1571.81	1571.8	1.91054	69.08	179	192	K	IVELAEGVTEDELR	A		0	2	ZP_01442878.1
F056005	P. bermudensis HTCC2601	3992	815.092	2.99629	2442.25	2442.25	1.77705	19.3	179	201	K	IVELAEGVTEDELRAATEATIVN	-		1	1	ZP_01442878.1
F056005	P. bermudensis HTCC2601	4370	653.823	3.99384	2611.26	2611.26	0.631879	18.11	193	219	K	AAEETPAAKPAASEAPKASPASDETKS	-		2	1	ZP_01442879.1
F056005	P. bermudensis HTCC2601	4304	858.735	2.99648	2573.18	2573.18	2.11917	59.46	82	106	K	AMTDFASAQAEVAAENMAAYAEIAK	K		0	2	ZP_01442880.1
F056005	P. bermudensis HTCC2601	1287	503.912	2.994	1508.71	1508.71	0.279708	28.87	134	148	K	ATDDMTAAAQKATSK	-		1	2	ZP_01442880.1
F056005	P. bermudensis HTCC2601	1725	546.61	2.99447	1636.81	1636.81	0.0403224	46.28	133	148	K	KATDDMTAAAQKATSK	-		2	2	ZP_01442880.1
F056005	P. bermudensis HTCC2601	3571	761.006	2.99603	2280	2279.99	1.17895	28.69	5	24	K	TQDYTAMMKDMMGAFPVDTK	A		1	2	ZP_01442880.1
F056005	P. bermudensis HTCC2601	1459	390.7	3.98969	1558.77	1558.77	-0.614587	16.24	93	107	K	IAHMEGGFGAWKGAK	K		1	1	ZP_01442906.1
F056005	P. bermudensis HTCC2601	2147	886.444	1.99773	1770.87	1770.87	0.422955	57.49	108	124	K	KPYIGTNMATGAPHQVS	-		0	4	ZP_01442906.1
F056005	P. bermudensis HTCC2601	2175	596.63	2.99494	1786.87	1786.87	0.198112	30.7	108	124	K	KPYIGTNMATGAPHQVS	-	Oxidation (M) [8]	0	2	ZP_01442906.1
F056005	P. bermudensis HTCC2601	4371	871.437	2.99653	2611.29	2611.29	1.07648	46.17	35	56	R	TPQEYMFEHIEGALLMPLAFFK	A		0	2	ZP_01442906.1
F056005	P. bermudensis HTCC2601	4407	876.768	2.99655	2627.28	2627.28	0.453701	40.42	35	56	R	TPQEYMFEHIEGALLMPLAFFK	A	Oxidation (M) [16]	0	2	ZP_01442906.1
F056005	P. bermudensis HTCC2601	378	565.806	1.99644	1129.6	1129.6	-0.754251	56.56	340	349	R	ILDEEGVVTR	V		0	2	ZP_01442907.1
F056005	P. bermudensis HTCC2601	2503	941.041	1.99786	1880.07	1880.06	2.76002	71.89	73	90	R	ITVPVLDAAAVEELTLAR	V		0	2	ZP_01442908.1
F056005	P. bermudensis HTCC2601	3068	1034.54	1.99805	2067.06	2067.05	4.59787	57.22	71	90	K	MLAGGSGYDVVVPTGTFLQR	Q		0	2	ZP_01442909.1
F056005	P. bermudensis HTCC2601	1976	859.93	1.99766	1717.85	1717.84	0.606574	32.71	209	224	K	ALVDLDPEALTSDTMK	A		0	2	ZP_01442927.1
F056005	P. bermudensis HTCC2601	207	508.301	1.99604	1014.59	1014.59	1.61248	22.78	319	327	K	LIVGPNFQK	V		0	2	ZP_01442927.1
F056005	P. bermudensis HTCC2601	764	649.378	1.9969	1296.74	1296.74	0.697904	49.62	76	88	R	VLSGNAPTAVQLK	G		0	2	ZP_01442927.1
F056005	P. bermudensis HTCC2601	2266	906.48	1.99778	1810.95	1810.94	1.99012	39.59	218	235	R	ADSPRDAALAIQSELAAL	-		1	2	ZP_01442958.1
F056005	P. bermudensis HTCC2601	493	595.299	1.99662	1188.58	1188.58	2.34902	47.82	134	144	R	AGDIAEMVVER	A		0	1	ZP_01442958.1
F056005	P. bermudensis HTCC2601	2541	948.497	1.99788	1894.98	1894.97	2.55412	78.01	148	167	R	ALEAGADGVIASPNEAAAIR	A		0	2	ZP_01442958.1
F056005	P. bermudensis HTCC2601	724	643.354	1.99687	1284.69	1284.69	1.05706	61.3	223	235	R	DAALAIQSELAAL	-		0	2	ZP_01442958.1
F056005	P. bermudensis HTCC2601	3454	559.794	3.9928	2235.15	2235.14	2.1493	15.8	81	100	R	GLAQFDLDFLTVHGDPHVVR	A		0	1	ZP_01442958.1
F056005	P. bermudensis HTCC2601	1124	718.342	1.9972	1434.67	1434.67	1.36687	49.97	2	13	M	AYTYDTENIFAK	I		0	2	ZP_01442975.1
F056005	P. bermudensis HTCC2601	4274	1278.57	1.99842	2555.12	2555.11	2.59167	119.81	50	72	R	GAYVNYDDFASNASDAEIVDYTR	A		0	1	ZP_01442975.1
F056005	P. bermudensis HTCC2601	5703	679.712	5.99111	4072.23	4072.22	1.96232	28.34	14	49	K	ILRGEIPNDTVLETEHSLAFNDIRPQAPIHVLVIPR	G		1	2	ZP_01442975.1
F056005	P. bermudensis HTCC2601	1258	499.899	2.99396	1496.67	1496.68	-0.209798	26.52	77	89	K	VCEMKGVEADGFR	M		1	1	ZP_01442975.1
F056005	P. bermudensis HTCC2601	470	590.37	1.99659	1178.73	1178.73	-1.00447	59.49	449	460	R	AILAALPEVLGL	-		0	2	ZP_01442985.1
F056005	P. bermudensis HTCC2601	3914	806.096	2.99625	2415.27	2415.26	1.7112	21.77	160	180	K	ALEHQAVLTSLENLMTFPFVR	E		0	1	ZP_01442987.1
F056005	P. bermudensis HTCC2601	65	432.235	1.99534	862.456	862.455	0.926425	19.28	209	215	K	LGRFEEI	-		1	1	ZP_01442987.1
F056005	P. bermudensis HTCC2601	955	689.351	1.99708	1376.69	1376.68	3.25057	66.79	123	134	K	DFQGTLVELEQV	-		0	2	ZP_01443000.1
F056005	P. bermudensis HTCC2601	2916	674.699	2.99552	2021.07	2021.07	2.27107	20.43	5	23	R	LNHVAIAVPDLEAAAAQYR	N		0	2	ZP_01443000.1
F056005	P. bermudensis HTCC2601	3166	703.062	2.9957	2106.17	2106.16	1.64327	31.64	22	42	K	TLTGPAPDRAALMPILTAAAR	S		1	2	ZP_01443003.1
F056005	P. bermudensis HTCC2601	468	590.318	1.99659	1178.62	1178.62	2.51311	66.6	9	19	R	AGFTALETELK	T		0	2	ZP_01443016.1
F056005	P. bermudensis HTCC2601	1349	507.957	2.99405	1520.85	1520.84	2.75242	32.03	9	22	R	AGFTALETELKTLK	S		1	2	ZP_01443016.1
F056005	P. bermudensis HTCC2601	1264	751.396	1.99732	1500.78	1500.78	-0.21189	81.62	127	140	R	ALIGKEEGDSVEVR	T		1	4	ZP_01443016.1
F056005	P. bermudensis HTCC2601	2028	577.949	2.99477	1730.82	1730.82	1.12374	38.83	38	52	R	ELGDLKENAEYHSAR	E		1	2	ZP_01443016.1
F056005	P. bermudensis HTCC2601	2800	663.661	2.99545	1987.96	1987.96	0.0518119	19.02	38	54	R	ELGDLKENAEYHSAREK	Q		2	1	ZP_01443016.1
F056005	P. bermudensis HTCC2601	1089	475.272	2.99364	1422.8	1422.79	0.777344	49.57	25	37	K	ERPAVIQAIAEAR	E		0	4	ZP_01443016.1
F056005	P. bermudensis HTCC2601	4250	636.112	3.99367	2540.42	2540.41	2.76057	40.49	62	85	R	IKEIEAVMSLAEVIDPTKLSGAVK	F		2	4	ZP_01443016.1
F056005	P. bermudensis HTCC2601	1731	546.981	2.99448	1637.92	1637.92	0.136148	44.74	23	37	K	SKERPAVIQAIAEAR	E		1	2	ZP_01443016.1
F056005	P. bermudensis HTCC2601	2224	600.641	2.99497	1798.9	1798.9	1.44922	21.07	141	156	R	TPGGEKSYEILSIDYK	-		1	2	ZP_01443016.1
F056005	P. bermudensis HTCC2601	1429	776.85	1.99741	1551.69	1551.68	2.84014	37.34	2	14	M	AFDAYMYFPGQSR	V		0	1	ZP_01443038.1
F056005	P. bermudensis HTCC2601	1033	703.875	1.99714	1405.74	1405.74	0.320829	27.77	4	15	K	GIHPEYHVIDVK	M		0	2	ZP_01443087.1
F056005	P. bermudensis HTCC2601	4302	644.077	3.99374	2572.28	2572.27	0.964905	34.96	4	25	K	GIHPEYHVIDVKMTDGTIYQTR	T		1	2	ZP_01443087.1
F056005	P. bermudensis HTCC2601	42	407.212	1.99505	812.409	812.407	2.46551	29.95	67	73	K	KYEGLGF	-		1	2	ZP_01443087.1
F056005	P. bermudensis HTCC2601	484	593.282	1.9966	1184.55	1184.55	-0.276898	59.72	16	25	K	MTDGTIYQTR	T		0	2	ZP_01443087.1
F056005	P. bermudensis HTCC2601	4995	750.114	3.99463	2996.43	2996.43	-0.124148	22.02	26	53	R	TTWGKEGDTLSLDVDPTVHPAWNGGTSR	L		1	2	ZP_01443087.1
F056005	P. bermudensis HTCC2601	1237	745.878	1.9973	1489.74	1489.74	0.541705	64.98	113	127	R	IAEDTNYKPLAGAGA	-		0	2	ZP_01443088.1
F056005	P. bermudensis HTCC2601	169	497.254	1.99595	992.494	992.493	1.15064	55.2	67	75	K	ISFGEGVER	V		0	1	ZP_01443088.1
F056005	P. bermudensis HTCC2601	363	561.3	1.99641	1120.59	1120.59	-1.44032	37.21	66	75	R	KISFGEGVER	V		1	2	ZP_01443088.1
F056005	P. bermudensis HTCC2601	16	364.21	1.99447	726.406	726.406	-0.530006	17.67	100	104	K	LYYLR	S		0	2	ZP_01443088.1
F056005	P. bermudensis HTCC2601	2280	907.492	1.99778	1812.97	1812.97	1.85497	63.17	1	17	-	MDLIAQLEAEQIAALGK	D		0	4	ZP_01443088.1
F056005	P. bermudensis HTCC2601	5160	1052.22	2.99713	3153.65	3153.64	3.86918	87.34	1	29	-	MDLIAQLEAEQIAALGKDIPDFKPGDTVR	V		1	4	ZP_01443088.1
F056005	P. bermudensis HTCC2601	5170	793.418	3.99492	3169.64	3169.63	2.90475	29.09	1	29	-	MDLIAQLEAEQIAALGKDIPDFKPGDTVR	V	Oxidation (M) [1]	1	2	ZP_01443088.1
F056005	P. bermudensis HTCC2601	1527	791.395	1.99745	1580.78	1580.77	1.47333	56.17	40	52	R	TRVQNYEGVCISR	K		1	3	ZP_01443088.1
F056005	P. bermudensis HTCC2601	1955	570.629	2.9947	1708.87	1708.87	-1.0545	42.57	40	53	R	TRVQNYEGVCISRK	N		2	3	ZP_01443088.1
F056005	P. bermudensis HTCC2601	2337	919.507	1.99781	1837	1837	0.815461	65.93	76	91	R	VFPLYSTNIESITVVR	R		0	2	ZP_01443088.1
F056005	P. bermudensis HTCC2601	832	662.82	1.99696	1323.63	1323.62	0.995751	53.42	42	52	R	VQNYEGVCISR	K		0	2	ZP_01443088.1
F056005	P. bermudensis HTCC2601	815	660.284	1.99695	1318.55	1318.55	0.947251	52.5	111	124	K	AAEAAEASEEAAAE	-		0	2	ZP_01443094.1
F056005	P. bermudensis HTCC2601	1551	795.368	1.99747	1588.72	1588.72	-0.0786796	73.25	108	124	R	AAKAAEAAEASEEAAAE	-		1	2	ZP_01443094.1
F056005	P. bermudensis HTCC2601	255	525.777	1.99617	1049.54	1049.54	0.896584	36.39	76	85	R	FLESAGVAEK	K		0	2	ZP_01443094.1
F056005	P. bermudensis HTCC2601	3171	703.373	2.9957	2107.1	2107.09	1.34403	31.36	33	50	R	FVEKLGTYNPLLAKDDER	R		2	3	ZP_01443094.1
F056005	P. bermudensis HTCC2601	1602	802.919	1.99749	1603.82	1603.82	2.05198	78.43	37	50	K	LGTYNPLLAKDDER	R		1	3	ZP_01443094.1
F056005	P. bermudensis HTCC2601	2119	587.648	2.99486	1759.92	1759.92	0.972202	40.45	37	51	K	LGTYNPLLAKDDERR	V		2	5	ZP_01443094.1
F056005	P. bermudensis HTCC2601	4380	873.117	2.99654	2616.33	2616.32	2.7833	37.41	51	72	R	RVVMDLERVQYWLGQGAQPTDR	V		2	4	ZP_01443094.1
F056005	P. bermudensis HTCC2601	1658	809.904	1.99751	1617.79	1617.79	1.65967	95.37	59	72	R	VQYWLGQGAQPTDR	V		0	2	ZP_01443094.1
F056005	P. bermudensis HTCC2601	4043	821.083	2.99632	2460.23	2460.22	2.47417	37.98	52	72	R	VVMDLERVQYWLGQGAQPTDR	V		1	3	ZP_01443094.1
F056005	P. bermudensis HTCC2601	4072	826.414	2.99634	2476.22	2476.22	1.07745	27.43	52	72	R	VVMDLERVQYWLGQGAQPTDR	V	Oxidation (M) [3]	1	2	ZP_01443094.1
F056005	P. bermudensis HTCC2601	4703	697.616	3.99422	2786.44	2786.43	2.68336	34.49	52	75	R	VVMDLERVQYWLGQGAQPTDRVAR	F		2	2	ZP_01443094.1
F056005	P. bermudensis HTCC2601	811	659.324	1.99694	1316.63	1316.63	0.770147	64.5	168	180	K	ADQAAISSAVDNR	M		0	2	ZP_01443108.1
F056005	P. bermudensis HTCC2601	3687	775.445	2.9961	2323.31	2323.31	1.03559	51.34	143	167	R	ASALANVEIVAKDTAAAIVAALGGK	A		1	3	ZP_01443108.1
F056005	P. bermudensis HTCC2601	5467	1208.32	2.9975	3621.94	3621.93	1.55469	56.55	143	180	R	ASALANVEIVAKDTAAAIVAALGGKADQAAISSAVDNR	M		2	6	ZP_01443108.1
F056005	P. bermudensis HTCC2601	4038	819.431	2.99631	2455.27	2455.27	1.23205	40.09	155	180	K	DTAAAIVAALGGKADQAAISSAVDNR	M		1	2	ZP_01443108.1
F056005	P. bermudensis HTCC2601	3415	739.374	2.99591	2215.1	2215.1	1.14261	28.78	122	142	R	EADAQIAEKTAESEAAIAEIR	A		1	2	ZP_01443108.1
F056005	P. bermudensis HTCC2601	58	429.756	1.99531	857.497	857.497	-0.457144	41.61	58	65	R	IASVLAER	Q		0	2	ZP_01443108.1
F056005	P. bermudensis HTCC2601	2026	865.459	1.99767	1728.9	1728.9	1.30661	70.54	66	81	R	QGTITNDIAAAEELKR	Q		1	4	ZP_01443108.1
F056005	P. bermudensis HTCC2601	2134	883.422	1.99772	1764.83	1764.83	1.04429	86.71	82	98	R	QSADAEAAYDKALADAR	A		1	3	ZP_01443108.1
F056005	P. bermudensis HTCC2601	4941	730.613	3.99449	2918.42	2918.41	4.35922	24.52	82	109	R	QSADAEAAYDKALADARAEAQAIGQQTR	D		2	1	ZP_01443108.1
F056005	P. bermudensis HTCC2601	100	456.785	1.99559	911.555	911.555	0.0285227	97.97	150	159	R	AAIVAVAAAR	D		0	2	ZP_01443109.1
F056005	P. bermudensis HTCC2601	3900	804.439	2.99624	2410.3	2410.29	1.48156	58.35	150	173	R	AAIVAVAAARDVIAQQTSAADKDR	M		2	3	ZP_01443109.1
F056005	P. bermudensis HTCC2601	1053	708.84	1.99716	1415.67	1415.66	1.27219	31.78	63	74	R	ADDIRNELDEAR	A		1	4	ZP_01443109.1
F056005	P. bermudensis HTCC2601	2074	875.462	1.9977	1748.91	1748.91	1.82571	77.36	75	89	R	ALREEAQTLLASYER	Q		1	4	ZP_01443109.1
F056005	P. bermudensis HTCC2601	483	592.349	1.9966	1182.68	1182.68	0.147969	34.57	148	159	R	DRAAIVAVAAAR	D		1	2	ZP_01443109.1
F056005	P. bermudensis HTCC2601	1332	759.383	1.99735	1516.75	1516.75	1.523	56.72	160	173	R	DVIAQQTSAADKDR	M		1	3	ZP_01443109.1
F056005	P. bermudensis HTCC2601	2274	604.986	2.99501	1811.94	1811.94	-0.163361	22.11	101	117	R	IVANAKEEAEIAAEQAR	K		1	2	ZP_01443109.1
F056005	P. bermudensis HTCC2601	1727	819.926	1.99754	1637.84	1637.84	-0.132492	82.68	128	144	R	LAAADDHIASAQASAVK	E		0	4	ZP_01443109.1
F056005	P. bermudensis HTCC2601	2924	675.024	2.99552	2022.05	2022.05	0.244801	69.73	128	147	R	LAAADDHIASAQASAVKEVR	D		1	2	ZP_01443109.1
F056005	P. bermudensis HTCC2601	3606	765.401	2.99605	2293.18	2293.18	1.63223	23.77	128	149	R	LAAADDHIASAQASAVKEVRDR	A		2	2	ZP_01443109.1
F056005	P. bermudensis HTCC2601	649	631.82	1.99681	1261.63	1261.62	2.59428	69.61	174	185	R	MIDESIAEVGAK	L		0	2	ZP_01443109.1
F056005	P. bermudensis HTCC2601	1305	756.89	1.99734	1511.77	1511.77	0.461712	74.53	174	187	R	MIDESIAEVGAKLH	-		1	4	ZP_01443109.1
F056005	P. bermudensis HTCC2601	1373	510.261	2.99408	1527.76	1527.76	1.18016	32.44	174	187	R	MIDESIAEVGAKLH	-	Oxidation (M) [1]	1	1	ZP_01443109.1
F056005	P. bermudensis HTCC2601	2208	897.977	1.99776	1793.94	1793.94	1.04686	78.72	127	144	R	RLAAADDHIASAQASAVK	E		1	3	ZP_01443109.1
F056005	P. bermudensis HTCC2601	3320	727.058	2.99584	2178.15	2178.15	0.638156	68.09	127	147	R	RLAAADDHIASAQASAVKEVR	D		2	6	ZP_01443109.1
F056005	P. bermudensis HTCC2601	408	573.32	1.99649	1144.63	1144.62	1.91679	48.74	53	63	R	AGISLFDAVPR	D		0	1	ZP_01443130.1
F056005	P. bermudensis HTCC2601	4455	887.063	2.99659	2658.17	2658.15	4.57197	58.1	118	140	R	FVHRDDMEAEGYGAYLDQVEDVT	-		1	2	ZP_01443138.1
F056005	P. bermudensis HTCC2601	3827	597.042	3.99325	2384.14	2384.14	0.107796	19.9	86	108	R	STHGDSHLGHVFPDGPADRGGLR	Y		1	2	ZP_01443138.1
F056005	P. bermudensis HTCC2601	745	431.57	2.993	1291.69	1291.69	0.49625	22.24	63	73	K	TIEPAHVQELR	D		0	1	ZP_01443138.1
F056005	P. bermudensis HTCC2601	306	542.267	1.99628	1082.52	1082.52	1.84293	43.11	109	117	R	YCINSASLR	F		0	2	ZP_01443138.1
F056005	P. bermudensis HTCC2601	2196	897.446	1.99776	1792.88	1792.88	1.64986	48.29	5	20	R	AVLAGGCFWGMQDLIR	K		0	2	ZP_01443139.1
F056005	P. bermudensis HTCC2601	3037	686.366	2.9956	2056.08	2056.07	0.826332	24.78	65	81	R	QILEVFFQIHDPSTLNR	Q		0	1	ZP_01443139.1
F056005	P. bermudensis HTCC2601	5203	1075.87	2.99719	3224.6	3224.59	2.9303	15.39	92	121	R	SAIYYVDEAQKQTALDTIADVDASGLWPGK	V		1	1	ZP_01443139.1
F056005	P. bermudensis HTCC2601	1197	735.355	1.99726	1468.7	1468.69	0.936886	67.33	30	43	R	VGYTGGDVPNATYR	N		0	2	ZP_01443139.1
F056005	P. bermudensis HTCC2601	3139	1048.09	1.99808	2094.16	2094.16	2.97829	46.15	18	38	K	SGVALALSAIEDDAPLLVVNK	A		0	1	ZP_01443157.1
F056005	P. bermudensis HTCC2601	1361	509.268	2.99407	1524.78	1524.78	0.190847	26.33	105	118	R	SPQRPNPIGSSMVR	L		0	2	ZP_01443184.1
F056005	P. bermudensis HTCC2601	3584	762.423	2.99604	2284.25	2284.24	2.62494	30.46	27	48	R	GVKLNYPEAVALITDAVVEGAR	D		1	2	ZP_01443186.1
F056005	P. bermudensis HTCC2601	2846	667.693	2.99547	2000.06	2000.06	0.420488	47.33	30	48	K	LNYPEAVALITDAVVEGAR	D		0	2	ZP_01443186.1
F056005	P. bermudensis HTCC2601	2611	641.692	2.99529	1922.05	1922.05	1.50204	56.72	14	30	K	DLDASIAFYKLLGLVER	R		1	2	ZP_01443198.1
F056005	P. bermudensis HTCC2601	933	457.251	2.99339	1368.73	1368.73	0.7854	29.3	12	23	R	VKDLDASIAFYK	L		1	2	ZP_01443198.1
F056005	P. bermudensis HTCC2601	3265	538.312	3.99252	2149.22	2149.21	2.71495	48.99	12	30	R	VKDLDASIAFYKLLGLVER	R		2	4	ZP_01443198.1
F056005	P. bermudensis HTCC2601	1762	549.298	2.9945	1644.87	1644.87	0.4359	26.62	104	118	R	ALKTQMQTAGDRLGR	L		2	3	ZP_01443202.1
F056005	P. bermudensis HTCC2601	3825	795.37	2.9962	2383.09	2383.08	2.84128	36.3	2	23	M	NDTTDWYGPDAATFGDRIAAAR	E		1	2	ZP_01443202.1
F056005	P. bermudensis HTCC2601	1405	769.375	1.99738	1536.74	1536.73	2.5782	41.73	43	55	K	TLHGWENDLAEPR	A		0	2	ZP_01443202.1
F056005	P. bermudensis HTCC2601	1938	568.634	2.99469	1702.88	1702.88	0.84504	18.63	107	121	K	TQMQTAGDRLGRLEK	T		2	2	ZP_01443202.1
F056005	P. bermudensis HTCC2601	3610	766.388	2.99606	2296.14	2296.14	2.17104	36.59	98	118	K	ASDAQLDEVTDALLLAMHDLR	S		0	2	ZP_01443205.1
F056005	P. bermudensis HTCC2601	1774	550.245	2.99451	1647.71	1647.71	0.793827	17.24	91	104	R	YGSCHLPMDDAQVR	A		0	1	ZP_01443228.1
F056005	P. bermudensis HTCC2601	3910	805.441	2.99625	2413.3	2413.3	2.30515	31.34	53	75	R	ARDLVTALDGVALDAIYSPGIQR	N		1	2	ZP_01443230.1
F056005	P. bermudensis HTCC2601	3347	729.727	2.99586	2186.16	2186.16	1.0873	72.01	55	75	R	DLVTALDGVALDAIYSPGIQR	N		0	4	ZP_01443230.1
F056005	P. bermudensis HTCC2601	3564	759.75	2.99602	2276.23	2276.22	2.65308	25.96	88	110	R	GLAVNRIPQEAPTAALAAASAER	S		1	1	ZP_01443230.1
F056005	P. bermudensis HTCC2601	637	629.326	1.9968	1256.64	1256.64	1.43319	63.66	76	87	R	NLDTAAPISEAR	G		0	2	ZP_01443230.1
F056005	P. bermudensis HTCC2601	3055	689.012	2.99561	2064.01	2064.01	0.387594	30.61	2	19	M	AYPDEQLKRSDPHAPQGR	A		2	2	ZP_01443232.1
F056005	P. bermudensis HTCC2601	2010	576.624	2.99476	1726.85	1726.85	0.66132	18.08	11	27	R	SDPHAPQGRADPGPLGR	A		1	3	ZP_01443232.1
F056005	P. bermudensis HTCC2601	209	509.775	1.99605	1017.54	1017.53	1.21667	51.78	74	83	K	DAELSATALK	V		0	2	ZP_01443246.1
F056005	P. bermudensis HTCC2601	943	458.605	2.99341	1372.79	1372.79	-0.415212	18.76	74	86	K	DAELSATALKVKK	E		2	1	ZP_01443246.1
F056005	P. bermudensis HTCC2601	2598	959.011	1.9979	1916.01	1916	3.50313	82.48	29	45	R	FLPNLNDVTLQSETLGR	G		0	4	ZP_01443246.1
F056005	P. bermudensis HTCC2601	498	397.896	2.99241	1190.67	1190.67	0.724804	18.95	63	73	R	GGLDKFLDKAK	D		2	2	ZP_01443246.1
F056005	P. bermudensis HTCC2601	3091	1037.06	1.99806	2072.11	2072.1	3.86468	62.5	28	45	R	RFLPNLNDVTLQSETLGR	G		1	1	ZP_01443246.1
F056005	P. bermudensis HTCC2601	3440	743.743	2.99594	2228.21	2228.2	1.94192	34.21	27	45	K	RRFLPNLNDVTLQSETLGR	G		2	4	ZP_01443246.1
F056005	P. bermudensis HTCC2601	4120	832.073	2.99637	2493.2	2493.2	0.74964	26.7	2	24	M	SRVCELTGKGPMTGHNVSHANNK	T		2	7	ZP_01443246.1
F056005	P. bermudensis HTCC2601	3498	751.029	2.99598	2250.06	2250.06	0.134218	36.42	4	24	R	VCELTGKGPMTGHNVSHANNK	T		1	2	ZP_01443246.1
F056005	P. bermudensis HTCC2601	2135	883.474	1.99772	1764.93	1764.93	2.52361	15.91	213	229	R	IGPASEVVPAWVAELLD	-		0	1	ZP_01443249.1
F056005	P. bermudensis HTCC2601	2891	1009	1.998	2015.98	2015.97	2.64885	89.72	112	130	K	FIDNDYVQPGGPSNPLGAR	A		0	2	ZP_01443278.1
F056005	P. bermudensis HTCC2601	1834	836.441	1.99759	1670.87	1670.86	2.44544	20.16	129	146	R	QSGALPAAQIEAFAIGAG	-		0	2	ZP_01443279.1
F056005	P. bermudensis HTCC2601	377	564.822	1.99643	1127.63	1127.63	0.33699	78.09	175	186	R	GIDLGGSLAVAR	A		0	2	ZP_01443288.1
F056005	P. bermudensis HTCC2601	3717	1168.63	1.99828	2335.25	2335.25	2.45627	42.4	141	162	R	EMGVLGLPITVILNPEGEEVAR	L		0	3	ZP_01443294.1
F056005	P. bermudensis HTCC2601	4412	878.116	2.99656	2631.33	2631.32	1.58133	29.27	85	110	K	EMPALAALQDALGGDSFEVVTIATGR	N		0	1	ZP_01443294.1
F056005	P. bermudensis HTCC2601	5278	830.422	3.99515	3317.66	3317.65	2.83695	16.11	111	140	R	NPPPAMQEFFEEIGVDSLPLHRDPGSVLAR	E		1	1	ZP_01443294.1
F056005	P. bermudensis HTCC2601	1671	810.92	1.99752	1619.83	1619.82	3.66954	47.72	138	151	R	FIFLENLDGAPEQK	T		0	2	ZP_01443302.1
F056005	P. bermudensis HTCC2601	735	645.334	1.99688	1288.65	1288.65	0.510611	57.1	363	376	R	ASGSPAFAGAVQAR	L		0	1	ZP_01443306.1
F056005	P. bermudensis HTCC2601	3882	804.07	2.99624	2409.19	2409.18	1.10245	27.26	172	195	R	GVTDALIGKVLGDDGSGSSDMLFR	A		1	2	ZP_01443306.1
F056005	P. bermudensis HTCC2601	3748	784.75	2.99615	2351.23	2351.22	2.55144	22.82	114	136	R	VAVLDTGIDTNHPAFAGVALNTR	D		0	1	ZP_01443306.1
F056005	P. bermudensis HTCC2601	1809	829.449	1.99757	1656.88	1656.88	2.62361	79.71	170	186	R	AQSVANVLVSSGVPSSR	I		0	4	ZP_01443311.1
F056005	P. bermudensis HTCC2601	1136	720.871	1.99721	1439.73	1439.73	0.866137	64.43	193	207	R	GEAAPVASNLTPEGK	A		0	2	ZP_01443311.1
F056005	P. bermudensis HTCC2601	2562	637.33	2.99526	1908.97	1908.97	1.49557	19.13	193	211	R	GEAAPVASNLTPEGKAQNR	R		1	2	ZP_01443311.1
F056005	P. bermudensis HTCC2601	3060	1033.57	1.99805	2065.12	2065.12	2.27735	94.74	187	207	R	ISVIGRGEAAPVASNLTPEGK	A		1	4	ZP_01443311.1
F056005	P. bermudensis HTCC2601	4242	845.795	2.99643	2534.36	2534.36	2.17452	50.23	187	211	R	ISVIGRGEAAPVASNLTPEGKAQNR	R		2	4	ZP_01443311.1
F056005	P. bermudensis HTCC2601	5566	1269	2.99762	3803.98	3803.98	1.21583	75.04	53	91	R	LIGGNNDDAVKNTLAGAAAGAIAGGVIGNQLDKQEAELR	Q		2	3	ZP_01443311.1
F056005	P. bermudensis HTCC2601	5101	1036.2	2.99708	3105.59	3105.58	2.15161	21.16	107	133	R	LIVTMPQDILFGFDSDTLRNDLQADIR	T		1	1	ZP_01443311.1
F056005	P. bermudensis HTCC2601	5485	913.215	3.99559	3648.83	3648.82	2.48793	44.66	102	133	R	NTGDRLIVTMPQDILFGFDSDTLRNDLQADIR	T		2	3	ZP_01443311.1
F056005	P. bermudensis HTCC2601	5501	917.212	3.99561	3664.82	3664.82	1.46256	41.22	102	133	R	NTGDRLIVTMPQDILFGFDSDTLRNDLQADIR	T	Oxidation (M) [10]	2	2	ZP_01443311.1
F056005	P. bermudensis HTCC2601	4518	903.484	2.99666	2707.43	2707.43	2.14595	69.84	64	91	K	NTLAGAAAGAIAGGVIGNQLDKQEAELR	Q		1	1	ZP_01443311.1
F056005	P. bermudensis HTCC2601	1740	820.449	1.99754	1638.88	1638.88	1.88604	92.22	35	52	R	NTNQGVILGALGGAAAGR	L		0	4	ZP_01443311.1
F056005	P. bermudensis HTCC2601	327	550.296	1.99634	1098.58	1098.58	-0.658123	54.63	92	101	R	QQLGNDVGIR	N		0	2	ZP_01443311.1
F056005	P. bermudensis HTCC2601	2285	907.499	1.99778	1812.98	1812.98	1.34695	84.14	169	186	R	RAQSVANVLVSSGVPSSR	I		1	4	ZP_01443311.1
F056005	P. bermudensis HTCC2601	366	562.346	1.99642	1122.68	1122.68	2.11726	26.85	212	221	R	RVEIVILPNA	-		1	2	ZP_01443311.1
F056005	P. bermudensis HTCC2601	5488	1217.59	2.99752	3649.73	3649.72	2.37525	69.17	134	168	R	TVGSSLLQYPNTSVQVVGHTDSDGDAGYNQGLSQR	R		0	4	ZP_01443311.1
F056005	P. bermudensis HTCC2601	5569	952.465	3.99577	3805.83	3805.83	1.17951	31.44	134	169	R	TVGSSLLQYPNTSVQVVGHTDSDGDAGYNQGLSQRR	A		1	2	ZP_01443311.1
F056005	P. bermudensis HTCC2601	1626	806.893	1.9975	1611.77	1611.77	-0.29905	23.12	174	187	R	SALAQSCFDFLPTR	A		0	1	ZP_01443315.1
F056005	P. bermudensis HTCC2601	2352	614.977	2.99509	1841.91	1841.9	2.59405	23.47	69	85	K	ATEIYAAFDGVSEKVDK	Q		1	2	ZP_01443319.1
F056005	P. bermudensis HTCC2601	3121	696.018	2.99566	2085.03	2085.03	2.24266	52.66	67	85	K	DKATEIYAAFDGVSEKVDK	Q		2	2	ZP_01443319.1
F056005	P. bermudensis HTCC2601	3970	609.586	3.99339	2434.31	2434.31	3.02509	32.04	9	30	K	QIDIGEALQTHVKNELGTVLEK	Y		1	1	ZP_01443319.1
F056005	P. bermudensis HTCC2601	635	629.297	1.9968	1256.58	1256.58	0.38199	20.48	177	187	R	RDDGNIGWIDP	-		1	1	ZP_01443319.1
F056005	P. bermudensis HTCC2601	2834	667.039	2.99547	1998.1	1998.09	1.60253	15.31	492	510	K	LAIQTSPIGGSQAIMIDRK	A		1	1	ZP_01443352.1
F056005	P. bermudensis HTCC2601	4519	904.112	2.99666	2709.31	2709.31	0.528916	50.33	117	142	R	ADYAVLGELTDFQGEAIEGAESGLVR	V		0	1	ZP_01443363.1
F056005	P. bermudensis HTCC2601	4969	989.17	2.99695	2964.49	2964.48	2.09413	37.92	117	144	R	ADYAVLGELTDFQGEAIEGAESGLVRVR	F		1	1	ZP_01443363.1
F056005	P. bermudensis HTCC2601	2641	647.038	2.99533	1938.09	1938.09	2.51588	30.68	66	82	R	IMIRPSPLQAQYLPGVR	W		0	2	ZP_01443363.1
F056005	P. bermudensis HTCC2601	1432	518.3	2.99417	1551.88	1551.88	0.762303	49.53	188	201	R	LLPEAVAWIVSQAR	-		0	2	ZP_01443363.1
F056005	P. bermudensis HTCC2601	4430	881.752	2.99657	2642.23	2642.23	-0.107485	33.15	162	187	R	SFEATELAAATDPDSIVAAFDSATSR	L		0	2	ZP_01443363.1
F056005	P. bermudensis HTCC2601	618	625.323	1.99678	1248.63	1248.63	0.0408447	72.77	98	110	R	SLSETGGLGSVSR	R		0	2	ZP_01443363.1
F056005	P. bermudensis HTCC2601	1927	851.456	1.99763	1700.9	1700.89	1.75966	42.49	119	135	K	AGSLVIIENADADGKTK	T		1	2	ZP_01443381.1
F056005	P. bermudensis HTCC2601	1652	809.417	1.99751	1616.82	1616.82	2.37318	95.98	149	163	R	ALVIDGAEVNENFAR	A		0	2	ZP_01443381.1
F056005	P. bermudensis HTCC2601	3471	1123.55	1.99821	2245.08	2245.08	2.86672	63.16	8	28	K	LDGGAAGEVELTDEIFDLEPR	A		0	1	ZP_01443381.1
F056005	P. bermudensis HTCC2601	4760	938.176	2.99678	2811.5	2811.5	3.32243	39.78	16	40	R	LFLEDGKQVPVTVLQLDGCQVVAQR	T		1	1	ZP_01443382.1
F056005	P. bermudensis HTCC2601	3238	714.37	2.99577	2140.09	2140.08	3.38305	18.68	12	30	K	AFDYRVLDASTQEIVNTAK	R		1	1	ZP_01443383.1
F056005	P. bermudensis HTCC2601	3613	766.403	2.99606	2296.19	2296.18	3.15088	28.36	12	31	K	AFDYRVLDASTQEIVNTAKR	T		2	1	ZP_01443383.1
F056005	P. bermudensis HTCC2601	524	402.58	2.99249	1204.72	1204.72	0.95126	22.48	38	48	R	GPIPLPNKIEK	F		1	2	ZP_01443383.1
F056005	P. bermudensis HTCC2601	2436	935.006	1.99785	1868	1868	0.0760173	52.95	73	89	R	LLDIVDPTPQTVDALMK	L		0	3	ZP_01443383.1
F056005	P. bermudensis HTCC2601	1235	744.9	1.9973	1487.79	1487.78	1.69447	96.96	17	30	R	VLDASTQEIVNTAK	R		0	2	ZP_01443383.1
F056005	P. bermudensis HTCC2601	1757	822.951	1.99755	1643.89	1643.88	1.59135	91.73	17	31	R	VLDASTQEIVNTAKR	T		1	4	ZP_01443383.1
F056005	P. bermudensis HTCC2601	4091	827.443	2.99635	2479.31	2479.3	1.65651	43.72	653	675	R	GNAVAIQAFVPLANMFGYINTLR	S		0	2	ZP_01443386.1
F056005	P. bermudensis HTCC2601	5002	1003.19	2.99699	3006.54	3006.53	2.27139	53.21	616	642	K	LLEPMMKVEVVTPEEYTGSIIGDLTSR	R		1	2	ZP_01443386.1
F056005	P. bermudensis HTCC2601	3490	750.404	2.99597	2248.19	2248.19	2.36057	38.9	57	76	R	APVEVFHEALDNIKPSVEVR	S		0	4	ZP_01443387.1
F056005	P. bermudensis HTCC2601	1816	830.963	1.99758	1659.91	1659.91	1.51996	57.72	11	25	R	EVLPDAKYGDIVLTK	F		1	3	ZP_01443387.1
F056005	P. bermudensis HTCC2601	4750	703.368	3.99427	2809.44	2809.44	1.24188	17.26	11	35	R	EVLPDAKYGDIVLTKFMNNLMVDGK	K		2	1	ZP_01443387.1
F056005	P. bermudensis HTCC2601	453	584.779	1.99656	1167.54	1167.54	0.862496	45.06	26	35	K	FMNNLMVDGK	K		0	2	ZP_01443387.1
F056005	P. bermudensis HTCC2601	756	648.826	1.9969	1295.64	1295.64	0.811184	31.96	26	36	K	FMNNLMVDGKK	S		1	4	ZP_01443387.1
F056005	P. bermudensis HTCC2601	948	688.881	1.99708	1375.75	1375.75	1.09541	61.71	42	53	K	IVYNALDRVEGK	V		1	2	ZP_01443387.1
F056005	P. bermudensis HTCC2601	1599	535.311	2.99436	1602.91	1602.91	1.15727	17.91	42	55	K	IVYNALDRVEGKVK	R		2	1	ZP_01443387.1
F056005	P. bermudensis HTCC2601	672	636.352	1.99683	1270.69	1270.69	1.22217	68.49	120	131	R	LAGELLDAVQSR	G		0	4	ZP_01443387.1
F056005	P. bermudensis HTCC2601	3558	759.04	2.99602	2274.1	2274.09	2.7699	33.66	112	131	R	NENTMEERLAGELLDAVQSR	G		1	1	ZP_01443387.1
F056005	P. bermudensis HTCC2601	3866	802.439	2.99623	2404.29	2404.29	3.453	33.78	56	76	K	RAPVEVFHEALDNIKPSVEVR	S		1	6	ZP_01443387.1
F056005	P. bermudensis HTCC2601	4198	840.085	2.9964	2517.23	2517.22	3.48241	31.21	110	131	R	SRNENTMEERLAGELLDAVQSR	G		2	3	ZP_01443387.1
F056005	P. bermudensis HTCC2601	2532	946.021	1.99787	1890.03	1890.02	3.38938	43.34	37	53	K	SVAEKIVYNALDRVEGK	V		2	4	ZP_01443387.1
F056005	P. bermudensis HTCC2601	2101	586.317	2.99485	1755.93	1755.93	1.87024	36.26	80	95	R	VGGATYQVPVEVRPER	R		0	2	ZP_01443387.1
F056005	P. bermudensis HTCC2601	2579	638.351	2.99527	1912.03	1912.03	1.24423	38.66	80	96	R	VGGATYQVPVEVRPERR	E		1	3	ZP_01443387.1
F056005	P. bermudensis HTCC2601	4415	527.298	4.99045	2631.45	2631.45	0.560148	41.52	54	76	K	VKRAPVEVFHEALDNIKPSVEVR	S		2	4	ZP_01443387.1
F056005	P. bermudensis HTCC2601	52	423.746	1.99525	845.477	845.476	1.8049	26.39	103	109	R	WLITASR	S		0	2	ZP_01443387.1
F056005	P. bermudensis HTCC2601	89	454.759	1.99557	907.502	907.501	1.06666	40.95	18	25	K	YGDIVLTK	F		0	2	ZP_01443387.1
F056005	P. bermudensis HTCC2601	3340	729.385	2.99586	2185.13	2185.13	2.31291	31.49	18	36	K	YGDIVLTKFMNNLMVDGKK	S		2	4	ZP_01443387.1
F056005	P. bermudensis HTCC2601	135	484.798	1.99584	967.582	967.581	0.410301	67.46	2	9	M	PTIQQLIR	K		0	2	ZP_01443388.1
F056005	P. bermudensis HTCC2601	3787	1183.68	1.9983	2365.35	2365.35	1.9773	90.21	2	23	M	ADLKALAEQIVGLTLLEAQELK	T		1	24	ZP_01443393.1
F056005	P. bermudensis HTCC2601	2655	970.061	1.99792	1938.11	1938.1	2.14075	92.22	6	23	K	ALAEQIVGLTLLEAQELK	T		0	12	ZP_01443393.1
F056005	P. bermudensis HTCC2601	20	379.743	1.99469	757.47	757.47	0.871322	25.21	80	87	R	GITGLGLK	E		0	2	ZP_01443393.1
F056005	P. bermudensis HTCC2601	314	543.83	1.9963	1085.65	1085.64	0.560036	41.73	80	90	R	GITGLGLKEAK	E		1	2	ZP_01443393.1
F056005	P. bermudensis HTCC2601	2450	935.537	1.99785	1869.06	1869.06	0.829295	78.57	80	98	R	GITGLGLKEAKELVEAGGK	A		2	6	ZP_01443393.1
F056005	P. bermudensis HTCC2601	142	485.806	1.99585	969.598	969.597	0.779705	55.56	72	79	K	INVIKEVR	G		1	4	ZP_01443393.1
F056005	P. bermudensis HTCC2601	1178	486.612	2.99379	1456.81	1456.81	0.156506	24.3	114	126	K	KKLEEAGAEIELK	-		2	2	ZP_01443393.1
F056005	P. bermudensis HTCC2601	848	665.368	1.99697	1328.72	1328.72	1.92592	56.23	115	126	K	KLEEAGAEIELK	-		1	2	ZP_01443393.1
F056005	P. bermudensis HTCC2601	516	601.32	1.99665	1200.62	1200.62	0.927851	58.76	116	126	K	LEEAGAEIELK	-		0	2	ZP_01443393.1
F056005	P. bermudensis HTCC2601	4146	833.138	2.99637	2496.39	2496.39	1.48975	37.99	1	23	-	MADLKALAEQIVGLTLLEAQELK	T		1	4	ZP_01443393.1
F056005	P. bermudensis HTCC2601	4176	838.47	2.9964	2512.39	2512.38	2.26876	27.28	1	23	-	MADLKALAEQIVGLTLLEAQELK	T	Oxidation (M) [1]	1	2	ZP_01443393.1
F056005	P. bermudensis HTCC2601	5744	1412.7	2.99786	4235.08	4235.07	2.32204	48.16	24	65	K	TILKDEYGIEPAAGGAVMMAGPAGGGEAAAEEEKTEFDVILK	S		2	3	ZP_01443393.1
F056005	P. bermudensis HTCC2601	5747	1063.78	3.99621	4251.07	4251.06	3.44361	34.41	24	65	K	TILKDEYGIEPAAGGAVMMAGPAGGGEAAAEEEKTEFDVILK	S	Oxidation (M) [19]	2	2	ZP_01443393.1
F056005	P. bermudensis HTCC2601	4788	1417.66	1.99858	2833.3	2833.3	-0.81495	64.36	58	83	K	ECESISSFLEGMTVLTYSEDPVAAAK	V		0	3	ZP_01443394.1
F056005	P. bermudensis HTCC2601	5392	861.931	3.99533	3443.69	3443.68	2.70234	55.55	52	83	K	IALQGKECESISSFLEGMTVLTYSEDPVAAAK	V		1	4	ZP_01443394.1
F056005	P. bermudensis HTCC2601	1587	801.439	1.99749	1600.86	1600.86	1.86837	92.21	94	109	K	KLEILGGAMGGTALDR	A		1	4	ZP_01443394.1
F056005	P. bermudensis HTCC2601	1242	746.377	1.9973	1490.74	1490.74	2.38271	56.48	178	190	K	ASFDEAQLVENIR	A		0	2	ZP_01443396.1
F056005	P. bermudensis HTCC2601	3534	755.735	2.996	2264.18	2264.18	0.972979	37.68	178	198	K	ASFDEAQLVENIRAFVSAVAK	A		1	2	ZP_01443396.1
F056005	P. bermudensis HTCC2601	2907	673.695	2.99551	2018.06	2018.06	3.42557	26.6	13	31	R	EAFAGKEDVTVEEAVALIK	S		1	2	ZP_01443396.1
F056005	P. bermudensis HTCC2601	5364	1130.55	2.99733	3388.63	3388.61	4.6978	52.6	81	113	R	GPKAEEAQAAGADIVGAEDLMETIQGGTIEFDR	C		1	2	ZP_01443396.1
F056005	P. bermudensis HTCC2601	814	659.858	1.99695	1317.7	1317.7	3.48259	78.49	142	154	K	VGTVTMDVAQAVK	D		0	2	ZP_01443396.1
F056005	P. bermudensis HTCC2601	908	680.871	1.99704	1359.73	1359.73	1.73344	36.85	18	31	K	ANPSPPVGPALGQR	G		0	2	ZP_01443397.1
F056005	P. bermudensis HTCC2601	2682	973.502	1.99793	1944.99	1944.98	3.2098	92.18	124	142	K	DLSANDVEAAMQIILGSAK	S		0	4	ZP_01443397.1
F056005	P. bermudensis HTCC2601	4490	897.464	2.99663	2689.37	2689.37	1.10212	30.96	124	149	K	DLSANDVEAAMQIILGSAKSMGIEVK	-		1	2	ZP_01443397.1
F056005	P. bermudensis HTCC2601	4808	949.495	2.99682	2845.46	2845.46	1.94029	56.58	116	142	R	EIAEAKMKDLSANDVEAAMQIILGSAK	S		2	4	ZP_01443397.1
F056005	P. bermudensis HTCC2601	4844	716.373	3.99438	2861.46	2861.45	3.88824	17.61	116	142	R	EIAEAKMKDLSANDVEAAMQIILGSAK	S	Oxidation (M) [7]	2	1	ZP_01443397.1
F056005	P. bermudensis HTCC2601	1701	815.924	1.99753	1629.83	1629.83	0.266285	61.49	97	112	R	GAENPGRETVATVTTK	Q		1	4	ZP_01443397.1
F056005	P. bermudensis HTCC2601	2881	672.028	2.9955	2013.06	2013.06	0.324878	54.49	97	115	R	GAENPGRETVATVTTKQVR	E		2	2	ZP_01443397.1
F056005	P. bermudensis HTCC2601	3397	1103.07	1.99817	2204.12	2204.12	1.54529	108.2	122	142	K	MKDLSANDVEAAMQIILGSAK	S		1	4	ZP_01443397.1
F056005	P. bermudensis HTCC2601	3422	741.047	2.99592	2220.12	2220.11	2.25709	48.28	122	142	K	MKDLSANDVEAAMQIILGSAK	S	Oxidation (M) [1]	1	2	ZP_01443397.1
F056005	P. bermudensis HTCC2601	4966	738.134	3.99454	2948.51	2948.5	1.23826	48.18	122	149	K	MKDLSANDVEAAMQIILGSAKSMGIEVK	-		2	4	ZP_01443397.1
F056005	P. bermudensis HTCC2601	227	520.277	1.99613	1038.54	1038.54	1.03415	16.18	73	81	K	TPPASYYLK	K		0	1	ZP_01443397.1
F056005	P. bermudensis HTCC2601	318	544.783	1.9963	1087.55	1087.55	0.656521	53.57	100	109	R	DAEVESILGR	V		0	2	ZP_01443398.1
F056005	P. bermudensis HTCC2601	4984	994.832	2.99696	2981.47	2981.47	0.528933	33.36	24	49	R	QSVEEQGLEDQIDEVLVPTEEVIEVR	R		0	2	ZP_01443398.1
F056005	P. bermudensis HTCC2601	5143	1046.87	2.99711	3137.59	3137.57	3.94318	51.82	24	50	R	QSVEEQGLEDQIDEVLVPTEEVIEVRR	G		1	2	ZP_01443398.1
F056005	P. bermudensis HTCC2601	4204	841.117	2.99641	2520.33	2520.32	2.79885	18.08	155	177	R	VAVSIFGRETPVELEFTQVSKQG	-		2	1	ZP_01443398.1
F056005	P. bermudensis HTCC2601	1541	529.613	2.99429	1585.82	1585.81	2.55137	21.03	5	17	R	WYSVSVLSNFEKK	I		1	1	ZP_01443398.1
F056005	P. bermudensis HTCC2601	3576	1141.54	1.99824	2281.06	2281.05	4.50274	52.65	165	185	R	AAIYGADEDAEMRNKIEDALS	-		2	2	ZP_01443400.1
F056005	P. bermudensis HTCC2601	3297	1086.07	1.99815	2170.12	2170.11	3.55189	69.51	145	164	K	SVAPDADLTVLTTEQVNEIR	A		0	4	ZP_01443400.1
F056005	P. bermudensis HTCC2601	3208	1061.04	1.9981	2120.07	2120.06	2.93105	55.91	203	221	R	AVDQPFLMPIEDVFSISGR	G		0	4	ZP_01443403.1
F056005	P. bermudensis HTCC2601	853	668.307	1.99699	1334.6	1334.6	-0.263	65.72	41	52	R	AYDQIDGAPEEK	A		0	2	ZP_01443403.1
F056005	P. bermudensis HTCC2601	1467	521.586	2.99421	1561.74	1561.74	-0.474472	31.7	41	54	R	AYDQIDGAPEEKAR	G		1	2	ZP_01443403.1
F056005	P. bermudensis HTCC2601	5666	994.251	3.99595	3972.97	3972.97	2.08836	15.38	151	187	R	ELLSEYDFPGDDIPIIAGSALAAMEGRDPEIGENKIK	E		2	1	ZP_01443403.1
F056005	P. bermudensis HTCC2601	2063	872.971	1.99769	1743.93	1743.92	2.02704	64.89	356	371	K	FAVELIAPIAMEDGLR	F		0	4	ZP_01443403.1
F056005	P. bermudensis HTCC2601	2114	587.646	2.99486	1759.92	1759.92	-1.28358	27.23	356	371	K	FAVELIAPIAMEDGLR	F	Oxidation (M) [11]	0	1	ZP_01443403.1
F056005	P. bermudensis HTCC2601	1495	784.937	1.99743	1567.86	1567.86	2.08501	47.31	232	246	R	GVVNVGDELEIVGIR	D		0	2	ZP_01443403.1
F056005	P. bermudensis HTCC2601	2583	957.023	1.99789	1912.03	1912.03	2.97172	62.5	232	249	R	GVVNVGDELEIVGIRDTK	K		1	2	ZP_01443403.1
F056005	P. bermudensis HTCC2601	2264	604.344	2.995	1810.01	1810.01	1.60994	38.46	261	277	R	KLLDRGEAGDNIGALLR	G		2	4	ZP_01443403.1
F056005	P. bermudensis HTCC2601	1879	841.965	1.99761	1681.92	1681.91	2.58397	45.53	262	277	K	LLDRGEAGDNIGALLR	G		1	4	ZP_01443403.1
F056005	P. bermudensis HTCC2601	514	601.271	1.99665	1200.53	1200.53	-0.0841297	38.13	251	260	K	TTCTGVEMFR	K		0	2	ZP_01443403.1
F056005	P. bermudensis HTCC2601	4165	1253.61	1.99839	2505.21	2505.2	3.01653	66.55	332	355	R	TTDVTGTVTLPEGTEMVMPGDNLK	F		0	4	ZP_01443403.1
F056005	P. bermudensis HTCC2601	1942	568.971	2.99469	1703.89	1703.89	2.4045	28.21	26	40	K	TTLTAAITKYFGDFR	A		1	1	ZP_01443403.1
F056005	P. bermudensis HTCC2601	491	594.847	1.99661	1187.68	1187.68	2.09232	24.82	380	391	R	TVGSGVVSKIIE	-		1	2	ZP_01443403.1
F056005	P. bermudensis HTCC2601	2172	596.006	2.99493	1785	1784.99	3.11262	16.81	36	53	K	LGHAAVVAPNLVEGPVSR	N		0	1	ZP_01443404.1
F056005	P. bermudensis HTCC2601	782	652.832	1.99691	1303.65	1303.64	3.43882	76.01	61	73	R	AAVQSELDAMAAK	L		0	2	ZP_01443406.1
F056005	P. bermudensis HTCC2601	4643	691.108	3.99417	2760.4	2760.4	1.88596	20.46	61	88	R	AAVQSELDAMAAKLGHASGIVVEGHSGR	T		1	2	ZP_01443406.1
F056005	P. bermudensis HTCC2601	4420	879.464	2.99656	2635.37	2635.37	1.30418	31.27	1	25	-	MYTNILVPIAFDSDAKAEAAVAVAR	Q		1	2	ZP_01443406.1
F056005	P. bermudensis HTCC2601	1384	766.372	1.99737	1530.73	1530.72	3.41015	48.19	103	116	R	SFEPVLYDVAATYG	-		0	2	ZP_01443408.1
F056005	P. bermudensis HTCC2601	4206	841.123	2.99641	2520.35	2520.35	0.326542	30.96	168	191	R	KGPAPQNLPVPTAEFVEETTILLG	-		1	2	ZP_01443416.1
F056005	P. bermudensis HTCC2601	1435	777.862	1.99741	1553.71	1553.71	1.07034	64.45	100	114	R	NPNIPEGADATDANR	A		0	2	ZP_01443416.1
F056005	P. bermudensis HTCC2601	4362	869.479	2.99652	2605.41	2605.41	0.913867	21.89	52	75	R	VDVSGVETGTQLTVQYLGKPVFIR	R		0	1	ZP_01443416.1
F056005	P. bermudensis HTCC2601	1565	532.324	2.99432	1593.95	1593.95	2.24788	29.86	19	34	K	GVNILADAVKVTLGPK	G		1	2	ZP_01443429.1
F056005	P. bermudensis HTCC2601	772	651.862	1.99691	1301.71	1301.71	0.0499343	50.56	37	48	R	NVVLDKSFGAPR	I		1	4	ZP_01443429.1
F056005	P. bermudensis HTCC2601	1315	757.402	1.99734	1512.79	1512.79	-0.647149	65.89	453	468	R	QIAQNAGVDGSVVAGK	I		0	1	ZP_01443429.1
F056005	P. bermudensis HTCC2601	4452	886.476	2.99659	2656.41	2656.4	2.25117	31.31	503	528	R	TALEDAASIAGLLITTEAMVADKPQK	D		0	2	ZP_01443429.1
F056005	P. bermudensis HTCC2601	4203	841.089	2.99641	2520.25	2520.24	3.06519	20.67	81	105	R	TNDEAGDGTTTATVLAQAIVKEGMK	S		1	1	ZP_01443429.1
F056005	P. bermudensis HTCC2601	3434	743.021	2.99593	2226.04	2226.04	1.06871	27.41	351	368	R	TQIEETSSDYDREKLQER	V		2	2	ZP_01443429.1
F056005	P. bermudensis HTCC2601	4373	654.09	3.99384	2612.33	2612.33	0.599465	32.4	322	345	K	TVTITKDETTIVDGHGEKAEIEAR	V		2	1	ZP_01443429.1
F056005	P. bermudensis HTCC2601	1696	814.907	1.99753	1627.8	1627.8	0.399312	73.15	33	48	K	EKPAEGVVVACGEGAR	K		0	4	ZP_01443430.1
F056005	P. bermudensis HTCC2601	2099	586.305	2.99485	1755.89	1755.89	0.352527	37.06	33	49	K	EKPAEGVVVACGEGARK	D		1	2	ZP_01443430.1
F056005	P. bermudensis HTCC2601	137	485.783	1.99585	969.551	969.549	1.40684	17.11	23	32	K	GGLIIPDSAK	E		0	2	ZP_01443430.1
F056005	P. bermudensis HTCC2601	4316	860.789	2.99649	2579.35	2579.34	3.00426	32.41	23	48	K	GGLIIPDSAKEKPAEGVVVACGEGAR	K		1	1	ZP_01443430.1
F056005	P. bermudensis HTCC2601	2692	976.465	1.99794	1950.92	1950.91	0.554612	26.48	378	396	R	NNQMVILDPAPSSFSGAGF	-		0	1	ZP_01443445.1
F056005	P. bermudensis HTCC2601	1801	827.961	1.99757	1653.91	1653.9	1.49948	38.68	53	69	R	VALLVPQSDSGAASIAR	D		0	2	ZP_01443445.1
F056005	P. bermudensis HTCC2601	1919	848.437	1.99763	1694.86	1694.85	4.20745	44.37	130	143	R	LVELQEEGYSYLRP	-		0	2	ZP_01443447.1
F056005	P. bermudensis HTCC2601	2711	652.686	2.99537	1955.04	1955.03	2.25469	30.2	110	129	K	TGAPVTLLEEAQVVSSGAAR	L		0	1	ZP_01443447.1
F056005	P. bermudensis HTCC2601	1650	809.403	1.99751	1616.79	1616.79	2.86309	75.76	107	121	K	ALDMLPADAYLPDGR	T		0	2	ZP_01443458.1
F056005	P. bermudensis HTCC2601	4180	839.423	2.9964	2515.25	2515.24	3.41956	44.15	107	130	K	ALDMLPADAYLPDGRTPADSATVR	S		1	5	ZP_01443458.1
F056005	P. bermudensis HTCC2601	4227	844.752	2.99642	2531.24	2531.23	0.98055	34.37	107	130	K	ALDMLPADAYLPDGRTPADSATVR	S	Oxidation (M) [4]	1	2	ZP_01443458.1
F056005	P. bermudensis HTCC2601	4035	1228.58	1.99836	2455.14	2455.14	1.16124	87.99	40	61	K	DFTPVCTTEFGAVAQLADEWAK	R		0	4	ZP_01443458.1
F056005	P. bermudensis HTCC2601	1743	547.617	2.99448	1639.83	1639.82	1.92582	25.99	140	153	K	KVQLMMTYPMSVGR	N		1	1	ZP_01443458.1
F056005	P. bermudensis HTCC2601	54	424.735	1.99526	847.455	847.455	-0.633662	40.54	154	160	R	NFAEVLR	A		0	2	ZP_01443458.1
F056005	P. bermudensis HTCC2601	1590	534.631	2.99435	1600.87	1600.87	0.910131	43.3	154	167	R	NFAEVLRALDGLQR	T		1	2	ZP_01443458.1
F056005	P. bermudensis HTCC2601	163	494.796	1.99593	987.578	987.575	2.37552	45.79	131	139	R	SVFIIAPNK	K		0	2	ZP_01443458.1
F056005	P. bermudensis HTCC2601	353	372.898	2.9919	1115.67	1115.67	0.639974	28.92	131	140	R	SVFIIAPNKK	V		1	2	ZP_01443458.1
F056005	P. bermudensis HTCC2601	1367	764.396	1.99736	1526.78	1526.78	0.636636	48.64	66	79	K	VMGISVDGVEEHKK	W		1	5	ZP_01443458.1
F056005	P. bermudensis HTCC2601	1418	515.264	2.99414	1542.77	1542.77	-0.273534	25.26	66	79	K	VMGISVDGVEEHKK	W	Oxidation (M) [2]	1	1	ZP_01443458.1
F056005	P. bermudensis HTCC2601	1303	756.874	1.99734	1511.73	1511.73	2.77166	49.42	141	153	K	VQLMMTYPMSVGR	N		0	2	ZP_01443458.1
F056005	P. bermudensis HTCC2601	1371	764.871	1.99737	1527.73	1527.72	1.87927	56.45	141	153	K	VQLMMTYPMSVGR	N	Oxidation (M) [4]	0	2	ZP_01443458.1
F056005	P. bermudensis HTCC2601	1370	764.871	1.99737	1527.73	1527.72	1.87927	51.05	141	153	K	VQLMMTYPMSVGR	N	Oxidation (M) [9]	0	2	ZP_01443458.1
F056005	P. bermudensis HTCC2601	4084	827.075	2.99635	2478.2	2478.19	4.24503	43.42	80	103	K	WKGDIESTSGASAGFPIVADDDLK	L		1	2	ZP_01443458.1
F056005	P. bermudensis HTCC2601	4717	698.611	3.99423	2790.42	2790.41	2.7659	38.68	80	106	K	WKGDIESTSGASAGFPIVADDDLKLAK	A		2	2	ZP_01443458.1
F056005	P. bermudensis HTCC2601	277	532.773	1.99622	1063.53	1063.53	0.95625	74.38	166	175	R	VGFTADDIAR	F		0	2	ZP_01443487.1
F056005	P. bermudensis HTCC2601	5375	1138.24	2.99735	3411.69	3411.68	2.61015	43.69	35	66	R	ASASMLEPVQVEAYGQMTPINQVGTVNVPEPR	M		0	2	ZP_01443499.1
F056005	P. bermudensis HTCC2601	1375	510.268	2.99408	1527.78	1527.78	1.05644	30.56	115	128	R	ELGKVAGQYAEHAR	V		1	2	ZP_01443499.1
F056005	P. bermudensis HTCC2601	4854	955.822	2.99684	2864.44	2864.44	1.15555	26.75	87	112	R	ESGLGINPQMNGTIIMLPIPELNEER	R		0	1	ZP_01443499.1
F056005	P. bermudensis HTCC2601	2873	1005.55	1.998	2009.09	2009.09	1.44443	74.69	2	21	M	AGSVNKVILVGNLGADPETR	T		1	4	ZP_01443508.1
F056005	P. bermudensis HTCC2601	2937	676.683	2.99553	2027.03	2027.02	1.7395	20.56	50	66	R	ERTEWHSVAIFSEPLAR	I		1	3	ZP_01443508.1
F056005	P. bermudensis HTCC2601	187	502.275	1.99599	1002.53	1002.53	0.286274	58.41	109	117	R	GELTLLDSR	Q		0	1	ZP_01443508.1
F056005	P. bermudensis HTCC2601	73	446.748	1.99549	891.481	891.481	-0.825592	24.39	67	73	R	IAEQYLR	K		0	2	ZP_01443508.1
F056005	P. bermudensis HTCC2601	1611	536.63	2.99437	1606.87	1606.87	0.390822	43.85	74	87	R	KGSKVYLEGQLETR	K		2	2	ZP_01443508.1
F056005	P. bermudensis HTCC2601	2046	581.635	2.9948	1741.88	1741.88	2.36411	30.4	52	66	R	TEWHSVAIFSEPLAR	I		0	2	ZP_01443508.1
F056005	P. bermudensis HTCC2601	1165	727.405	1.99723	1452.8	1452.79	1.2445	58.68	8	21	K	VILVGNLGADPETR	T		0	2	ZP_01443508.1
F056005	P. bermudensis HTCC2601	536	604.321	1.99667	1206.63	1206.62	1.83404	52.97	78	87	K	VYLEGQLETR	K		0	2	ZP_01443508.1
F056005	P. bermudensis HTCC2601	286	534.315	1.99623	1066.62	1066.61	1.45601	26.72	11	20	R	DIPAQVLVGR	G		0	2	ZP_01443511.1
F056005	P. bermudensis HTCC2601	4636	920.455	2.99672	2758.34	2758.34	0.424893	47.62	105	131	K	TTGQTGVEMEALTAVSTAALTVYDMAK	A		0	2	ZP_01443525.1
F056005	P. bermudensis HTCC2601	5416	878.21	3.99541	3508.81	3508.8	2.18508	35.33	20	53	K	ALLCAADLAAHYGATVIYVGVTTEQPSAIAHTPK	E		0	1	ZP_01443557.1
F056005	P. bermudensis HTCC2601	2391	619.321	2.99512	1854.94	1854.94	2.4513	33.27	78	94	K	AYASHDPSIDLDPTLLK	A		0	2	ZP_01443557.1
F056005	P. bermudensis HTCC2601	2379	618.652	2.99512	1852.93	1852.93	1.24236	40.83	54	70	K	EYAEKLSAFAADQAALR	G		1	2	ZP_01443557.1
F056005	P. bermudensis HTCC2601	2085	438.494	3.99081	1749.95	1749.94	1.0166	19.25	5	19	R	IMVPVDLTHAERLEK	A		1	1	ZP_01443557.1
F056005	P. bermudensis HTCC2601	45	409.253	1.99508	816.491	816.489	2.34173	46.44	131	137	K	ISVMLVR	-		0	2	ZP_01443557.1
F056005	P. bermudensis HTCC2601	577	617.335	1.99674	1232.65	1232.65	2.87348	101.71	59	70	K	LSAFAADQAALR	G		0	2	ZP_01443557.1
F056005	P. bermudensis HTCC2601	2607	640.68	2.99528	1919.02	1919.01	3.0078	35.68	59	77	K	LSAFAADQAALRGISTEAK	A		1	2	ZP_01443557.1
F056005	P. bermudensis HTCC2601	1779	825.386	1.99756	1648.76	1648.75	2.18104	54.7	156	169	K	EINSMEDLQGLNMR	F		0	2	ZP_01443562.1
F056005	P. bermudensis HTCC2601	560	613.817	1.99672	1225.62	1225.62	2.86958	54.81	170	180	R	FFGLGAEVMQK	L		0	2	ZP_01443562.1
F056005	P. bermudensis HTCC2601	4277	1279.14	1.99843	2556.26	2556.26	2.52087	73.87	200	223	R	GAIDATEFSMPLVDANLGFYNIAK	Y		0	3	ZP_01443562.1
F056005	P. bermudensis HTCC2601	2592	958.53	1.9979	1915.05	1915.04	2.59785	66.87	181	199	K	LGVSTSLLAGGDIFPALER	G		0	2	ZP_01443562.1
F056005	P. bermudensis HTCC2601	3361	1095.58	1.99816	2189.14	2189.13	2.63392	69.08	58	80	K	AAGMLVMPLVTEAGLGVGGAYGR	G		0	4	ZP_01443572.1
F056005	P. bermudensis HTCC2601	4357	868.802	2.99652	2603.38	2603.38	1.11816	48.26	144	169	R	GDTLAAETTTSLSPVIAVIFGQSGLR	L		0	2	ZP_01443572.1
F056005	P. bermudensis HTCC2601	796	437.242	2.99309	1308.7	1308.7	-0.366011	30.91	170	181	R	LGATLEGTKYTR	I		1	2	ZP_01443572.1
F056005	P. bermudensis HTCC2601	3665	1158.07	1.99826	2314.12	2314.12	2.73107	88.61	37	57	R	VDSTLSQMYSQFPGTIDLGQK	A		0	4	ZP_01443572.1
F056005	P. bermudensis HTCC2601	1065	709.344	1.99716	1416.67	1416.67	1.332	66.03	85	97	R	VGGATVDYYSMVR	G		0	2	ZP_01443572.1
F056005	P. bermudensis HTCC2601	4653	922.754	2.99673	2765.24	2765.24	0.0640089	61.08	173	199	R	SAGGLVLGDGSMSVSDAYGEEHACQIR	-		0	2	ZP_01443660.1
F056005	P. bermudensis HTCC2601	4529	906.794	2.99667	2717.36	2717.35	2.2923	56.45	16	43	K	FLPGQTVLGAGTADFPSAEGTDASPLAK	R		0	2	ZP_01443675.1
F056005	P. bermudensis HTCC2601	3744	784.051	2.99615	2349.13	2349.13	0.856488	34.6	143	164	R	GVVYLHMQGACAGCPSSTLTLK	M		0	2	ZP_01443675.1
F056005	P. bermudensis HTCC2601	1613	804.942	1.9975	1607.87	1607.87	1.93175	40.07	173	186	R	HYIPEVTEVRPVAV	-		0	4	ZP_01443675.1
F056005	P. bermudensis HTCC2601	1853	839.431	1.9976	1676.85	1676.84	2.08904	61.07	1	15	-	MFIQTESTPNPATLK	F		0	2	ZP_01443675.1
F056005	P. bermudensis HTCC2601	126	473.264	1.99574	944.513	944.511	1.41978	44.32	165	172	K	MGIENLLR	H		0	2	ZP_01443675.1
F056005	P. bermudensis HTCC2601	3089	691.351	2.99563	2071.03	2071.02	2.9512	58.9	124	142	R	VRPAVAQDGGDITFHGFER	G		0	4	ZP_01443675.1
F056005	P. bermudensis HTCC2601	4753	937.511	2.99678	2809.51	2809.51	1.58853	46.99	87	115	R	EGDVVSEILGQVKADDAIGVLVLGAASGK	K		1	2	ZP_01443676.1
F056005	P. bermudensis HTCC2601	2043	868.997	1.99768	1735.98	1735.97	4.16654	27.03	128	145	R	GSGSLPIPVTIVPGDLSK	E		0	2	ZP_01443676.1
F056005	P. bermudensis HTCC2601	3351	730.041	2.99586	2187.1	2187.1	1.09369	20.75	191	211	K	GMANHVLTDKGLAAFLSDAEK	A		1	2	ZP_01443683.1
F056005	P. bermudensis HTCC2601	4279	640.094	3.99371	2556.35	2556.34	3.25505	30.97	191	215	K	GMANHVLTDKGLAAFLSDAEKAGIK	I		2	2	ZP_01443683.1
F056005	P. bermudensis HTCC2601	830	661.889	1.99696	1321.76	1321.76	2.95364	54.81	177	190	K	IGADVATAPPAVIK	G		0	2	ZP_01443683.1
F056005	P. bermudensis HTCC2601	3468	562.098	3.99283	2244.36	2244.36	2.32049	42.14	72	92	R	KLAEIAPNIAIKVPLTLDGLR	A		2	4	ZP_01443683.1
F056005	P. bermudensis HTCC2601	3196	706.428	2.99572	2116.26	2116.26	0.396926	27.76	73	92	K	LAEIAPNIAIKVPLTLDGLR	A		1	1	ZP_01443683.1
F056005	P. bermudensis HTCC2601	5509	1226.65	2.99754	3676.92	3676.9	3.79395	76.56	1	34	-	MKFFVDTADVDAIRELNDLGLVDGVTTNPSLIAK	S		2	5	ZP_01443683.1
F056005	P. bermudensis HTCC2601	3201	1059.53	1.9981	2117.05	2117.04	2.15206	83.2	149	166	R	QIYDNYGYETQILAASIR	S		0	4	ZP_01443683.1
F056005	P. bermudensis HTCC2601	3403	737.4	2.9959	2209.18	2209.17	4.00377	44.67	203	224	R	KTPARDEVAALSAEVAQVLANG	-		2	2	ZP_01443686.1
F056005	P. bermudensis HTCC2601	3112	694.699	2.99565	2081.08	2081.08	0.672729	25.38	204	224	K	TPARDEVAALSAEVAQVLANG	-		1	1	ZP_01443686.1
F056005	P. bermudensis HTCC2601	1915	564.611	2.99465	1690.81	1690.81	2.33735	31.03	186	202	R	VGYAEAFGHGLSAAEGR	K		0	2	ZP_01443686.1
F056005	P. bermudensis HTCC2601	845	665.355	1.99697	1328.7	1328.69	1.87402	39.52	57	68	R	DGRESAINLELL	-		1	2	ZP_01443697.1
F056005	P. bermudensis HTCC2601	721	643.35	1.99687	1284.69	1284.68	2.0363	41.64	26	36	K	DVFVHISALER	S		0	4	ZP_01443697.1
F056005	P. bermudensis HTCC2601	181	501.28	1.99598	1000.54	1000.54	0.610668	44.31	60	68	R	ESAINLELL	-		0	2	ZP_01443697.1
F056005	P. bermudensis HTCC2601	472	591.793	1.9966	1181.57	1181.57	0.306372	33.84	14	25	K	GYGFIAPEGGSK	D		0	2	ZP_01443697.1
F056005	P. bermudensis HTCC2601	4007	817.091	2.9963	2448.25	2448.24	2.90535	38.18	14	36	K	GYGFIAPEGGSKDVFVHISALER	S		1	2	ZP_01443697.1
F056005	P. bermudensis HTCC2601	959	690.369	1.99708	1378.72	1378.72	-0.485956	60.42	2	13	M	PTGTVKWFNTTK	G		1	2	ZP_01443697.1
F056005	P. bermudensis HTCC2601	3506	751.39	2.99598	2251.15	2251.14	1.67159	50.77	37	56	R	SGLTELKDNQKVSYELQSGR	D		2	2	ZP_01443697.1
F056005	P. bermudensis HTCC2601	3631	769.071	2.99607	2304.19	2304.19	2.14306	36.8	222	243	R	IRDGDSAVADAFLAYLQGPVAR	A		1	2	ZP_01443700.1
F056005	P. bermudensis HTCC2601	2750	985.481	1.99796	1968.95	1968.94	2.72329	77.46	156	173	K	DTFSLLGFTAAVEDAEQR	C		0	2	ZP_01443718.1
F056005	P. bermudensis HTCC2601	4100	829.079	2.99636	2484.21	2484.21	0.287817	29.47	151	173	R	GTQTKDTFSLLGFTAAVEDAEQR	C		1	2	ZP_01443718.1
F056005	P. bermudensis HTCC2601	4676	925.111	2.99673	2772.31	2772.3	2.59063	15.71	151	176	R	GTQTKDTFSLLGFTAAVEDAEQRCAG	-		2	1	ZP_01443718.1
F056005	P. bermudensis HTCC2601	2567	637.663	2.99526	1909.97	1909.96	1.49584	29.25	173	190	R	IANDDGKADVLWVPGANR	-		1	2	ZP_01443726.1
F056005	P. bermudensis HTCC2601	2179	596.957	2.99494	1787.85	1787.85	0.785302	20.75	96	110	R	QVDRLEEEIDAMNAR	L		1	1	ZP_01443726.1
F056005	P. bermudensis HTCC2601	2022	577.308	2.99477	1728.9	1728.9	0.533287	35.77	11	27	R	TGDKGDTALVDGTRVPK	F		2	4	ZP_01443726.1
F056005	P. bermudensis HTCC2601	2497	939.486	1.99786	1876.96	1876.95	2.5568	67.63	32	49	R	VEAYGTADELNAVLGVTR	L		0	1	ZP_01443726.1
F056005	P. bermudensis HTCC2601	4411	877.806	2.99656	2630.4	2630.39	1.76666	51.36	202	227	R	GVGSEEDFVIIEKLADKLGAAVGASR	A		2	2	ZP_01443734.1
F056005	P. bermudensis HTCC2601	4722	932.497	2.99676	2794.47	2794.48	-1.63823	68.61	69	96	R	LAEPTAALIVSLAGDYSHIVAPATTDAK	N		0	3	ZP_01443734.1
F056005	P. bermudensis HTCC2601	511	599.835	1.99664	1197.66	1197.65	1.25412	62.71	163	174	K	AMAIELAPAGVR	V		0	2	ZP_01443743.1
F056005	P. bermudensis HTCC2601	2158	888.426	1.99773	1774.84	1774.83	1.78383	41.63	52	66	R	EIAEETQSADELRER	L		1	4	ZP_01443756.1
F056005	P. bermudensis HTCC2601	5809	963.457	4.99477	4812.25	4812.23	3.49505	15.49	67	108	R	LIESHQTQIEVDEPEDDSMALLMGAEQDKPVEDDMSEEKLLR	A		1	1	ZP_01443756.1
F056005	P. bermudensis HTCC2601	1214	492.263	2.99386	1473.77	1473.77	-0.310089	34.86	52	66	R	AGLVESVRGPGGGYR	L		1	2	ZP_01443777.1
F056005	P. bermudensis HTCC2601	4221	1264.14	1.99841	2526.28	2526.27	3.103	72.13	129	153	R	LSDVVGNSLAPCPAVPSLFAVVDEA	-		0	4	ZP_01443777.1
F056005	P. bermudensis HTCC2601	1856	839.958	1.9976	1677.9	1677.9	2.07522	28.33	35	48	R	QDVSLPYLEQLFVK	L		0	2	ZP_01443777.1
F056005	P. bermudensis HTCC2601	4686	926.492	2.99674	2776.46	2776.45	1.92872	43.8	9	34	R	YAMVALTDIAMQPDGVLVTLGDISKR	Q		1	1	ZP_01443777.1
F056005	P. bermudensis HTCC2601	1799	551.631	2.99452	1651.87	1651.87	1.25736	26.61	2	16	M	PEVIFPGPEGRLEGR	Y		1	2	ZP_01443778.1
F056005	P. bermudensis HTCC2601	725	643.354	1.99687	1284.69	1284.69	1.17771	33.34	159	171	R	VAPPADTTSLVSK	L		0	2	ZP_01443778.1
F056005	P. bermudensis HTCC2601	751	648.32	1.99689	1294.63	1294.62	2.74366	80.34	92	104	R	AFASDEIAMAAAK	Q		0	2	ZP_01443782.1
F056005	P. bermudensis HTCC2601	2884	672.674	2.99551	2015	2015	1.79454	36.17	181	200	R	ASTAAEKAYVEAGGYGTTIR	K		1	2	ZP_01443782.1
F056005	P. bermudensis HTCC2601	998	466.238	2.99352	1395.69	1395.69	-0.0601852	42.61	147	159	R	MPETGASNLLHAR	A		0	2	ZP_01443782.1
F056005	P. bermudensis HTCC2601	3653	771.688	2.99608	2312.04	2312.04	3.44112	16.13	121	138	R	QFFYLPLMHSENLCDQDR	C		0	1	ZP_01443782.1
F056005	P. bermudensis HTCC2601	1769	549.659	2.9945	1645.95	1645.95	1.49701	38.24	158	173	R	KVKVPGHAAEVLEAAK	A		2	4	ZP_01443786.1
F056005	P. bermudensis HTCC2601	279	533.775	1.99623	1065.54	1065.53	1.13277	57.25	142	151	R	STFVIDAEGK	I		0	2	ZP_01443786.1
F056005	P. bermudensis HTCC2601	2970	1021.51	1.99803	2041	2041	0.858404	73.41	153	175	K	GAPAPAAAPAQQQAPAAPQGQGS	-		0	2	ZP_01443789.1
F056005	P. bermudensis HTCC2601	3436	743.046	2.99593	2226.12	2226.11	0.517494	64.89	151	175	R	GKGAPAPAAAPAQQQAPAAPQGQGS	-		1	2	ZP_01443789.1
F056005	P. bermudensis HTCC2601	3834	597.563	3.99326	2386.22	2386.22	0.369622	18.67	5	27	K	SKINEPGPKAEDNAPKPAAEAPR	A		2	3	ZP_01443789.1
F056005	P. bermudensis HTCC2601	3701	775.731	2.9961	2324.17	2324.16	2.09193	15.29	311	331	K	ASGFISTYKDASNHLTDLEKK	S		2	2	ZP_01443803.1
F056005	P. bermudensis HTCC2601	1622	806.39	1.9975	1610.77	1610.76	2.35292	50.55	270	283	K	EGSYGFVYTYNIAK	N		0	2	ZP_01443803.1
F056005	P. bermudensis HTCC2601	2778	990.013	1.99797	1978.01	1978	3.27957	24.46	97	113	R	FLQFIDSDLLAPLDTDR	L		0	1	ZP_01443803.1
F056005	P. bermudensis HTCC2601	5194	1069.55	2.99717	3205.63	3205.62	3.80083	77.64	67	96	R	LVDDQGKQFNLLAAEAPNPSVDIMTVAGHR	F		1	2	ZP_01443803.1
F056005	P. bermudensis HTCC2601	4896	965.135	2.99687	2892.38	2892.38	2.00562	64.25	284	310	K	NCPNPDNAYTFLNAILASPEIGAAMTK	A		0	2	ZP_01443803.1
F056005	P. bermudensis HTCC2601	923	455.939	2.99337	1364.79	1364.79	0.836024	19.32	215	225	K	NFLIEHKPLVR	K		0	1	ZP_01443803.1
F056005	P. bermudensis HTCC2601	4017	817.756	2.9963	2450.25	2450.24	3.12704	24.52	74	96	K	QFNLLAAEAPNPSVDIMTVAGHR	F		0	2	ZP_01443803.1
F056005	P. bermudensis HTCC2601	2544	950.464	1.99788	1898.91	1898.92	-1.06745	42.78	332	347	K	STSFPDEQLANLQFFR	A		0	2	ZP_01443803.1
F056005	P. bermudensis HTCC2601	688	637.853	1.99684	1273.69	1273.69	0.361155	26.8	355	366	K	YGLVDPAVEAIK	A		0	1	ZP_01443803.1
F056005	P. bermudensis HTCC2601	1059	708.891	1.99716	1415.77	1415.77	1.72486	42.6	355	368	K	YGLVDPAVEAIKAA	-		1	2	ZP_01443803.1
F056005	P. bermudensis HTCC2601	1506	525.276	2.99425	1572.81	1572.8	1.07324	29.75	78	92	R	AERELGAIGASMVNR	C		1	2	ZP_01443805.1
F056005	P. bermudensis HTCC2601	554	609.32	1.99669	1216.63	1216.62	1.86171	54.13	81	92	R	ELGAIGASMVNR	C		0	1	ZP_01443805.1
F056005	P. bermudensis HTCC2601	1796	826.43	1.99756	1650.85	1650.84	3.09721	42.61	181	195	R	LMHVLGDPVREEVSA	-		1	3	ZP_01443805.1
F056005	P. bermudensis HTCC2601	2091	878.415	1.99771	1754.81	1754.81	1.51127	18.26	62	77	R	SPLFNAIMYDPGGMSR	A		0	1	ZP_01443805.1
F056005	P. bermudensis HTCC2601	2841	500.786	3.99195	1999.12	1999.11	2.54213	26.96	44	61	K	VSAYVLTLAHDVESLKVR	S		1	2	ZP_01443805.1
F056005	P. bermudensis HTCC2601	4484	895.789	2.99663	2684.35	2684.34	2.32422	55.05	19	43	R	VTPVDLQEATEEQLDALSVTPSNTK	V		0	2	ZP_01443805.1
F056005	P. bermudensis HTCC2601	4299	858.093	2.99648	2571.26	2571.25	3.0841	22.8	1	27	-	MTIFDSTTLSAAGITAGSATGAAAETR	S		0	1	ZP_01443806.1
F056005	P. bermudensis HTCC2601	2455	935.995	1.99785	1869.98	1869.97	3.5883	67.29	28	45	R	SNIIEATQAAEDAVLTPK	D		0	2	ZP_01443806.1
F056005	P. bermudensis HTCC2601	4915	969.507	2.99688	2905.5	2905.49	1.90157	52.57	28	55	R	SNIIEATQAAEDAVLTPKDAGAFPHALR	A		1	3	ZP_01443806.1
F056005	P. bermudensis HTCC2601	2236	901.494	1.99777	1800.97	1800.97	2.261	83.26	166	183	R	ATGAAVTQLSGQITQSLR	-		0	2	ZP_01443814.1
F056005	P. bermudensis HTCC2601	3144	1049.07	1.99808	2096.12	2096.11	3.14487	26.33	146	165	R	IQGFDIVVPMVGEGPQAIAR	A		0	2	ZP_01443814.1
F056005	P. bermudensis HTCC2601	4501	900.799	2.99665	2699.37	2699.37	3.41414	63.12	97	123	R	NLGDLPSATLSEGIDPIAIAQGAYEGK	A		0	2	ZP_01443827.1
F056005	P. bermudensis HTCC2601	5719	831.828	4.99395	4154.1	4154.1	0.889242	26.69	30	69	K	VVTTFTVLADMAQNVAGDAAEVVSITKPGAEIHGYEPTPR	D		0	1	ZP_01443827.1
F056005	P. bermudensis HTCC2601	4709	930.169	2.99675	2787.48	2787.48	1.39553	45.1	68	94	R	SLPVSGIFELVNLLESQGAVAGQAFNK	G		0	2	ZP_01443835.1
F056005	P. bermudensis HTCC2601	2766	658.348	2.99541	1972.02	1972.02	2.79359	41.82	355	372	K	FVDALQIFSHVANLGDAR	S		0	2	ZP_01443836.1
F056005	P. bermudensis HTCC2601	3735	782.397	2.99614	2344.17	2344.17	-1.22047	45.15	48	67	R	EYLLENPQVIMEAVNALENR	Q		0	2	ZP_01443858.1
F056005	P. bermudensis HTCC2601	407	572.802	1.99648	1143.59	1143.59	1.27144	32.05	248	257	R	QLVDQIRSEG	-		1	2	ZP_01443858.1
F056005	P. bermudensis HTCC2601	1318	505.574	2.99402	1513.7	1513.7	-0.0627601	31.34	99	112	R	DVHDLTAEGSSVER	E		0	1	ZP_01443873.1
F056005	P. bermudensis HTCC2601	3406	1106.54	1.99818	2211.07	2211.06	4.97771	69.97	271	290	R	ASNLWSMSLFMANNSAALQR	L		0	3	ZP_01443879.1
F056005	P. bermudensis HTCC2601	821	660.328	1.99695	1318.64	1318.64	1.33471	29.44	164	175	K	EIGSPEDFQGLK	F		0	2	ZP_01443879.1
F056005	P. bermudensis HTCC2601	1539	793.892	1.99746	1585.77	1585.77	0.0460344	50.49	134	146	R	ELCDELYSIFGLK	A		0	2	ZP_01443879.1
F056005	P. bermudensis HTCC2601	4140	1249.11	1.99839	2496.21	2496.2	3.17443	72.33	291	314	R	LQSGGVTLMEFPDSVWDAFGAAAK	E		0	4	ZP_01443879.1
F056005	P. bermudensis HTCC2601	291	536.284	1.99624	1070.55	1070.55	0.160664	32.79	178	188	R	MPGQGGQVLGK	L		0	2	ZP_01443879.1
F056005	P. bermudensis HTCC2601	414	574.33	1.99649	1146.65	1146.64	4.64226	27.87	33	42	R	TLTLVTTWGR	G		0	2	ZP_01443879.1
F056005	P. bermudensis HTCC2601	606	623.818	1.99677	1245.62	1245.62	0.463223	53.25	45	55	R	DTIEALQEATR	N		0	1	ZP_01443891.1
F056005	P. bermudensis HTCC2601	3662	772.366	2.99609	2314.08	2314.08	-0.964963	29.27	93	112	R	RIDEGEYGYCEVTGEPISLK	R		1	1	ZP_01443891.1
F056005	P. bermudensis HTCC2601	4066	824.404	2.99633	2470.19	2470.18	4.43773	57.84	93	113	R	RIDEGEYGYCEVTGEPISLKR	L		2	2	ZP_01443891.1
F056005	P. bermudensis HTCC2601	4456	887.461	2.99659	2659.36	2659.35	4.56991	23.73	115	138	R	IFDEANQTLIYLVHANELVDGSAK	L		0	1	ZP_01443893.1
F056005	P. bermudensis HTCC2601	3746	784.052	2.99615	2349.13	2349.13	2.51668	43.31	18	40	R	AGLLAADGERPVPMSPQGDPDEK	A		0	2	ZP_01443894.1
F056005	P. bermudensis HTCC2601	2389	619.304	2.99512	1854.89	1854.89	2.70044	19.21	139	156	K	ANITGDTPDAGEHGRVVF	-		1	2	ZP_01443894.1
F056005	P. bermudensis HTCC2601	4213	842.405	2.99641	2524.19	2524.19	0.488077	62.88	116	138	K	FTPHEAEIWSGDGGASFLYEIAK	A		0	1	ZP_01443894.1
F056005	P. bermudensis HTCC2601	1111	715.356	1.99718	1428.7	1428.7	1.77715	64.82	39	52	R	AGGDQEVATQALNR	E		0	2	ZP_01443904.1
F056005	P. bermudensis HTCC2601	3646	771.048	2.99608	2310.12	2310.12	1.43542	27.07	2	23	M	GVSDEQTPLVTDVQGDGRQGPR	V		1	2	ZP_01443904.1
F056005	P. bermudensis HTCC2601	4934	972.188	2.99689	2913.54	2913.54	1.08665	18.48	170	196	R	IVPVDVYVPGCPPTAEALLYGLMALQK	K		0	2	ZP_01443904.1
F056005	P. bermudensis HTCC2601	1239	745.9	1.9973	1489.79	1489.78	3.10583	97.25	113	126	R	QSDLMIVAGTLTNK	M		0	2	ZP_01443904.1
F056005	P. bermudensis HTCC2601	3222	710.718	2.99575	2129.13	2129.13	-1.11783	21.39	113	132	R	QSDLMIVAGTLTNKMAPALR	K		1	1	ZP_01443904.1
F056005	P. bermudensis HTCC2601	871	671.326	1.997	1340.64	1340.64	1.0219	43.22	26	38	K	SGPSSPVAYGTYR	A		0	2	ZP_01443904.1
F056005	P. bermudensis HTCC2601	1492	523.607	2.99423	1567.8	1567.8	-0.371221	50.64	24	38	R	VKSGPSSPVAYGTYR	A		1	2	ZP_01443904.1
F056005	P. bermudensis HTCC2601	709	642.318	1.99686	1282.62	1282.62	1.4525	27.85	143	153	K	DFPTTGYVEVR	Y		0	2	ZP_01443905.1
F056005	P. bermudensis HTCC2601	153	492.762	1.99591	983.51	983.508	2.45956	36.23	129	136	R	ILTDYGFR	G		0	1	ZP_01443905.1
F056005	P. bermudensis HTCC2601	4599	915.096	2.9967	2742.27	2742.26	1.28434	34.59	174	197	R	QFDFMSPWEGAQYVLPGDEKAEAK	-		1	2	ZP_01443905.1
F056005	P. bermudensis HTCC2601	1524	790.922	1.99745	1579.83	1579.82	3.19529	47.64	161	173	R	VVYEPVSLVQEYR	Q		0	2	ZP_01443905.1
F056005	P. bermudensis HTCC2601	5290	1110.87	2.99728	3329.58	3329.58	1.80203	43.24	32	61	R	AFDEAVASIGCNLDYEADYLPVELQTGLTR	E		0	2	ZP_01443907.1
F056005	P. bermudensis HTCC2601	5783	1516.07	2.99801	4545.19	4545.18	2.72267	69.32	32	71	R	AFDEAVASIGCNLDYEADYLPVELQTGLTREQVQQVANYR	I		1	3	ZP_01443907.1
F056005	P. bermudensis HTCC2601	579	617.812	1.99674	1233.61	1233.61	0.214006	36.26	62	71	R	EQVQQVANYR	I		0	2	ZP_01443907.1
F056005	P. bermudensis HTCC2601	1078	711.355	1.99717	1420.7	1420.69	0.839026	91.29	72	86	R	IAAGAGESTEVGGFR	L		0	2	ZP_01443907.1
F056005	P. bermudensis HTCC2601	5668	1328.98	2.99773	3983.92	3983.91	3.08818	76.12	72	113	R	IAAGAGESTEVGGFRLTTGSCTPTAEAPVVEAEPAPAPTSAG	-		1	2	ZP_01443907.1
F056005	P. bermudensis HTCC2601	4323	861.416	2.99649	2581.23	2581.22	1.82123	36.86	87	113	R	LTTGSCTPTAEAPVVEAEPAPAPTSAG	-		0	2	ZP_01443907.1
F056005	P. bermudensis HTCC2601	3979	813.059	2.99628	2436.16	2436.15	1.41945	48.06	59	81	R	IADACYGEGIYLAPSPYGGAVHR	A		0	2	ZP_01443912.1
F056005	P. bermudensis HTCC2601	176	500.314	1.99597	998.614	998.612	1.82353	42.74	50	58	R	VVTLLVAER	I		0	2	ZP_01443912.1
F056005	P. bermudensis HTCC2601	798	655.812	1.99693	1309.61	1309.61	-0.0320707	58.59	107	118	R	GVTLGQEAGYCR	V		0	1	ZP_01443914.1
F056005	P. bermudensis HTCC2601	3250	716.709	2.99578	2147.1	2147.11	-0.27572	47.97	87	106	R	DGAADIVWTLLGYTPGVFPR	S		0	2	ZP_01443915.1
F056005	P. bermudensis HTCC2601	4498	899.788	2.99664	2696.34	2696.34	1.91779	33.33	178	204	R	TGAWVISGMGAEPVGMPVPTLPEAMAK	G		0	1	ZP_01443915.1
F056005	P. bermudensis HTCC2601	4630	918.455	2.99671	2752.34	2752.34	-0.0770252	25.94	401	425	R	IFSDEVSVDEAFSIIEEEGNALLAR	F		0	2	ZP_01443945.1
F056005	P. bermudensis HTCC2601	3414	738.73	2.99591	2213.17	2213.17	-0.588297	17.8	75	96	R	SGEQPNILQVFDAGAATIIAAK	G		0	1	ZP_01443945.1
F056005	P. bermudensis HTCC2601	4610	1372.64	1.99853	2743.27	2743.26	3.20713	66.64	2	24	M	ARSDFAWLNFDTEFTQPNQEATR	T		1	4	ZP_01443975.1
F056005	P. bermudensis HTCC2601	5726	1044.49	3.99614	4173.94	4173.93	2.98184	27.76	2	37	M	ARSDFAWLNFDTEFTQPNQEATRTFVIDDDPVDASR	S		2	2	ZP_01443975.1
F056005	P. bermudensis HTCC2601	2144	885.954	1.99773	1769.89	1769.89	1.40461	48.2	128	145	R	EKNAAGGITGPDRITAEA	-		2	4	ZP_01443975.1
F056005	P. bermudensis HTCC2601	5120	780.135	3.99484	3116.51	3116.5	3.34349	35.13	76	101	R	HLPSFDMVDQQGWNLWMDRIPSGFLK	K		1	2	ZP_01443975.1
F056005	P. bermudensis HTCC2601	1312	757.386	1.99734	1512.76	1512.75	2.39828	65.74	130	145	K	NAAGGITGPDRITAEA	-		1	2	ZP_01443975.1
F056005	P. bermudensis HTCC2601	4187	1259.07	1.9984	2516.13	2516.12	2.78722	78.52	4	24	R	SDFAWLNFDTEFTQPNQEATR	T		0	4	ZP_01443975.1
F056005	P. bermudensis HTCC2601	5256	1098.19	2.99725	3291.54	3291.53	3.28115	79.26	38	69	R	SGQSVSAEGYIMIQAQDVGVGSTEEGDAITHR	I		0	3	ZP_01443975.1
F056005	P. bermudensis HTCC2601	1154	725.347	1.99722	1448.68	1448.68	0.474916	62.5	25	37	R	TFVIDDDPVDASR	S		0	2	ZP_01443975.1
F056005	P. bermudensis HTCC2601	5805	1181.56	3.99659	4722.21	4722.2	1.63547	63.53	25	69	R	TFVIDDDPVDASRSGQSVSAEGYIMIQAQDVGVGSTEEGDAITHR	I		1	2	ZP_01443975.1
F056005	P. bermudensis HTCC2601	351	558.803	1.99639	1115.59	1115.59	1.14289	63.96	119	127	R	VANIMVQWR	E		0	2	ZP_01443975.1
F056005	P. bermudensis HTCC2601	5142	1045.87	2.99711	3134.59	3134.58	2.96977	16.41	140	169	R	NTAPGTTMSFAGLNKPADRVNLIAYLQGTN	-		1	2	ZP_01443999.1
F056005	P. bermudensis HTCC2601	5152	1051.2	2.99713	3150.59	3150.58	4.25002	15.7	140	169	R	NTAPGTTMSFAGLNKPADRVNLIAYLQGTN	-	Oxidation (M) [8]	1	1	ZP_01443999.1
F056005	P. bermudensis HTCC2601	521	603.33	1.99666	1204.65	1204.65	0.561161	44.25	159	169	R	VNLIAYLQGTN	-		0	2	ZP_01443999.1
F056005	P. bermudensis HTCC2601	910	681.326	1.99704	1360.64	1360.64	0.381439	49.32	105	116	R	MIFGGFETLFEA	-		0	2	ZP_01444006.1
F056005	P. bermudensis HTCC2601	951	689.324	1.99708	1376.63	1376.63	1.16226	34.92	105	116	R	MIFGGFETLFEA	-	Oxidation (M) [1]	0	2	ZP_01444006.1
F056005	P. bermudensis HTCC2601	3197	706.685	2.99572	2117.03	2117.03	3.22434	33.4	2	20	M	SYVSGFMAAVPIENKDAYR	A		1	2	ZP_01444006.1
F056005	P. bermudensis HTCC2601	1636	538.569	2.99439	1612.69	1612.68	1.89002	26.86	92	104	R	WGEMMEMPFDGKR	M		1	2	ZP_01444006.1
F056005	P. bermudensis HTCC2601	808	439.577	2.99313	1315.71	1315.71	-0.753966	41.57	65	77	R	ATSDAEKLAGVVR	A		1	2	ZP_01444007.1
F056005	P. bermudensis HTCC2601	840	442.586	2.99317	1324.74	1324.74	0.384983	32.08	213	224	R	HGVKTEIDVLSK	T		1	2	ZP_01444007.1
F056005	P. bermudensis HTCC2601	3187	705.664	2.99572	2113.97	2113.97	2.04639	54.25	236	254	R	HVQDLDADMIVMGAYGHSR	F		0	2	ZP_01444007.1
F056005	P. bermudensis HTCC2601	1569	799.408	1.99748	1596.8	1596.8	2.53695	65.37	266	279	R	NMLEQAEVPVFLAH	-		0	2	ZP_01444007.1
F056005	P. bermudensis HTCC2601	852	667.84	1.99698	1333.67	1333.66	2.42565	51.75	200	212	R	SDPGGALSQYLAR	H		0	1	ZP_01444007.1
F056005	P. bermudensis HTCC2601	571	615.81	1.99673	1229.61	1229.6	1.45006	56.38	281	293	R	AVATYVHGLGGGE	-		0	2	ZP_01444011.1
F056005	P. bermudensis HTCC2601	3448	745.034	2.99594	2232.08	2232.08	1.40228	34.6	71	90	R	GNVEQAIQDHEAELAPINER	L		0	2	ZP_01444011.1
F056005	P. bermudensis HTCC2601	2432	933.943	1.99784	1865.87	1865.87	2.95037	57.89	263	280	R	YGVMPAMGGADLSEAEIR	A		0	2	ZP_01444011.1
F056005	P. bermudensis HTCC2601	1491	523.6	2.99423	1567.78	1567.78	-0.0491141	16.16	8	20	K	SFMTASRLEQDKR	R		2	1	ZP_01444012.1
F056005	P. bermudensis HTCC2601	5126	781.909	3.99485	3123.61	3123.6	2.21923	29.84	332	361	K	ACAEDRHLLAGLNVHAGQLTNAPVAEALGR	A		1	1	ZP_01444021.1
F056005	P. bermudensis HTCC2601	118	466.759	1.99568	931.503	931.501	1.6833	52.61	362	370	R	AFVAPESVL	-		0	2	ZP_01444021.1
F056005	P. bermudensis HTCC2601	5106	1038.15	2.99709	3111.43	3111.42	2.34459	42.28	280	307	R	ATTHDDPVYEVDGIQHYCVANMPGAVPR	T		0	4	ZP_01444021.1
F056005	P. bermudensis HTCC2601	5130	782.863	3.99485	3127.42	3127.41	2.8458	23.35	280	307	R	ATTHDDPVYEVDGIQHYCVANMPGAVPR	T	Oxidation (M) [22]	0	2	ZP_01444021.1
F056005	P. bermudensis HTCC2601	4897	965.149	2.99687	2892.42	2892.42	2.0367	25.81	253	279	R	EMLGLMKPGAVLVDVAIDQGGCFETSR	A		0	2	ZP_01444021.1
F056005	P. bermudensis HTCC2601	705	641.325	1.99686	1280.64	1280.63	3.13517	50.52	63	73	R	EVFDATEMIVK	V		0	2	ZP_01444021.1
F056005	P. bermudensis HTCC2601	1193	734.406	1.99726	1466.8	1466.79	4.17851	32.75	125	139	R	GGLPLLAPMSEVAGR	L		0	2	ZP_01444021.1
F056005	P. bermudensis HTCC2601	4352	866.806	2.99651	2597.39	2597.39	3.30294	28.63	157	185	R	GVLMGGVPGVGPANVVVVGGGNVGTHAAR	I		0	1	ZP_01444021.1
F056005	P. bermudensis HTCC2601	4375	872.135	2.99654	2613.38	2613.38	0.36734	35.84	157	185	R	GVLMGGVPGVGPANVVVVGGGNVGTHAAR	I	Oxidation (M) [4]	0	2	ZP_01444021.1
F056005	P. bermudensis HTCC2601	3922	808.117	2.99626	2421.33	2421.32	2.36276	29.35	338	361	R	HLLAGLNVHAGQLTNAPVAEALGR	A		0	2	ZP_01444021.1
F056005	P. bermudensis HTCC2601	973	694.373	1.9971	1386.73	1386.73	1.38455	80.69	186	199	R	IAAGMGANVTVLDR	S		0	2	ZP_01444021.1
F056005	P. bermudensis HTCC2601	1016	702.371	1.99713	1402.73	1402.72	1.99754	76.43	186	199	R	IAAGMGANVTVLDR	S	Oxidation (M) [5]	0	2	ZP_01444021.1
F056005	P. bermudensis HTCC2601	2345	614.341	2.99508	1840	1840	1.40544	26.82	186	203	R	IAAGMGANVTVLDRSLPR	L		1	2	ZP_01444021.1
F056005	P. bermudensis HTCC2601	5225	813.932	3.99505	3251.7	3251.69	0.854016	31.64	331	361	R	KACAEDRHLLAGLNVHAGQLTNAPVAEALGR	A		2	2	ZP_01444021.1
F056005	P. bermudensis HTCC2601	844	665.354	1.99697	1328.69	1328.69	1.48793	45.29	140	151	R	LAPQMGAWSLQK	A		0	2	ZP_01444021.1
F056005	P. bermudensis HTCC2601	881	673.352	1.99701	1344.69	1344.69	2.12615	24.33	140	151	R	LAPQMGAWSLQK	A	Oxidation (M) [5]	0	2	ZP_01444021.1
F056005	P. bermudensis HTCC2601	5320	841.44	3.99521	3361.73	3361.72	3.1118	24.28	249	279	K	LISREMLGLMKPGAVLVDVAIDQGGCFETSR	A		1	2	ZP_01444021.1
F056005	P. bermudensis HTCC2601	1594	801.92	1.99749	1601.83	1601.82	3.14767	38.14	204	216	R	LRYLDDVFGTTFR	N		1	4	ZP_01444021.1
F056005	P. bermudensis HTCC2601	5223	1084.58	2.99721	3250.73	3250.73	0.0184574	41.04	217	248	R	NRYSTEGALVEVLPEADMVIGAVLIPGAAAPK	L		1	2	ZP_01444021.1
F056005	P. bermudensis HTCC2601	2953	1017.06	1.99802	2032.11	2032.1	4.31671	77.18	308	327	R	TSTIALGNATLPFVMALANK	G		0	4	ZP_01444021.1
F056005	P. bermudensis HTCC2601	851	667.327	1.99698	1332.64	1332.64	2.55734	49.87	206	216	R	YLDDVFGTTFR	N		0	2	ZP_01444021.1
F056005	P. bermudensis HTCC2601	4981	1491.3	1.99865	2980.59	2980.58	2.13515	63.47	219	248	R	YSTEGALVEVLPEADMVIGAVLIPGAAAPK	L		0	8	ZP_01444021.1
F056005	P. bermudensis HTCC2601	4998	999.869	2.99698	2996.58	2996.58	1.89182	22.3	219	248	R	YSTEGALVEVLPEADMVIGAVLIPGAAAPK	L	Oxidation (M) [16]	0	2	ZP_01444021.1
F056005	P. bermudensis HTCC2601	3401	736.409	2.9959	2206.2	2206.2	3.60938	38.2	120	140	K	EVDAAALAVAREPGEVVEILR	Y		1	2	ZP_01444024.1
F056005	P. bermudensis HTCC2601	3760	789.402	2.99617	2365.18	2365.18	1.47473	18.39	38	59	R	AAEQAAKEFGFSLEEILAANEK	K		1	1	ZP_01444037.1
F056005	P. bermudensis HTCC2601	4125	624.327	3.99355	2493.28	2493.28	1.70699	37.64	38	60	R	AAEQAAKEFGFSLEEILAANEKK	G		2	4	ZP_01444037.1
F056005	P. bermudensis HTCC2601	1920	848.927	1.99763	1695.84	1695.84	2.78447	30.36	45	59	K	EFGFSLEEILAANEK	K		0	1	ZP_01444037.1
F056005	P. bermudensis HTCC2601	2675	648.979	2.99534	1943.92	1943.91	1.33236	23.35	64	81	K	GAPKYANPADPDQTWTGR	G		1	2	ZP_01444037.1
F056005	P. bermudensis HTCC2601	1800	551.975	2.99453	1652.9	1652.9	1.4889	38.32	82	96	R	GRKPNWVVAALEEGK	S		1	1	ZP_01444037.1
F056005	P. bermudensis HTCC2601	3904	805.089	2.99625	2412.24	2412.25	-1.04218	30.1	82	103	R	GRKPNWVVAALEEGKSMEDLAL	-		2	1	ZP_01444037.1
F056005	P. bermudensis HTCC2601	3953	810.423	2.99627	2428.25	2428.24	1.8812	15.02	82	103	R	GRKPNWVVAALEEGKSMEDLAL	-	Oxidation (M) [17]	2	1	ZP_01444037.1
F056005	P. bermudensis HTCC2601	3395	734.051	2.99588	2199.13	2199.12	3.1649	22.76	84	103	R	KPNWVVAALEEGKSMEDLAL	-		1	2	ZP_01444037.1
F056005	P. bermudensis HTCC2601	4349	866.769	2.99651	2597.28	2597.28	2.35015	39.15	1	22	-	MNFDLESLSKEELTELKTDVEK	A		2	2	ZP_01444037.1
F056005	P. bermudensis HTCC2601	1558	796.36	1.99747	1590.71	1590.71	-0.0226315	69.27	68	81	K	YANPADPDQTWTGR	G		0	2	ZP_01444037.1
F056005	P. bermudensis HTCC2601	3036	686.355	2.9956	2056.04	2056.04	0.858446	31.48	173	191	R	HGILGVEMEAAELYNLAAR	H		0	2	ZP_01444038.1
F056005	P. bermudensis HTCC2601	2234	900.927	1.99776	1799.84	1799.84	0.140012	25.5	218	234	R	QSSFGDMVQIALEAAFS	-		0	2	ZP_01444038.1
F056005	P. bermudensis HTCC2601	1075	710.361	1.99716	1418.71	1418.71	-0.191724	35.98	307	320	K	GLVEACKGIDSSLA	-		1	2	ZP_01444061.1
F056005	P. bermudensis HTCC2601	3368	1096.54	1.99816	2191.06	2191.05	3.09167	30.56	228	248	K	TGSAFYAPATSAIEMAEAYLK	D		0	2	ZP_01444061.1
F056005	P. bermudensis HTCC2601	4095	828.781	2.99635	2483.32	2483.31	3.38781	41.93	370	393	K	IINESGLDVIAADNLSDGAEKIVK	A		1	2	ZP_01444063.1
F056005	P. bermudensis HTCC2601	1771	549.959	2.99451	1646.86	1646.86	-0.306645	28.43	86	101	R	MLGHTLVTHQTGPAGK	Q		0	2	ZP_01444063.1
F056005	P. bermudensis HTCC2601	865	669.337	1.99699	1336.66	1336.66	2.32072	27.78	186	196	R	QCSNLLGNLYR	M		0	2	ZP_01444063.1
F056005	P. bermudensis HTCC2601	2067	874.437	1.9977	1746.86	1746.85	2.7186	43.69	76	92	R	DGVQAFAPTNVTDSLGR	S		0	2	ZP_01444064.1
F056005	P. bermudensis HTCC2601	2725	654.334	2.99538	1959.98	1959.98	1.37706	36.25	74	92	R	GRDGVQAFAPTNVTDSLGR	S		1	2	ZP_01444064.1
F056005	P. bermudensis HTCC2601	754	648.426	1.99689	1294.84	1294.83	3.10078	65.49	93	105	R	SLILGGVALLLAR	V		0	2	ZP_01444064.1
F056005	P. bermudensis HTCC2601	1958	856.43	1.99765	1710.85	1710.84	1.70968	53.51	119	134	R	LIGPNCPGVITPDACK	I		0	2	ZP_01444065.1
F056005	P. bermudensis HTCC2601	297	539.276	1.99626	1076.54	1076.54	0.881531	29.57	339	347	R	LGFMSFFTK	A		0	2	ZP_01444067.1
F056005	P. bermudensis HTCC2601	5018	756.892	3.99468	3023.54	3023.53	2.6813	17.38	46	76	K	AAALGEAAHFVKTDVTDAAQGEAAVAAALER	F		1	2	ZP_01444085.1
F056005	P. bermudensis HTCC2601	2323	611.651	2.99506	1831.93	1831.93	2.67096	27.07	77	94	R	FGRLDGLVSCAGVAPGEK	I		1	2	ZP_01444085.1
F056005	P. bermudensis HTCC2601	344	556.827	1.99638	1111.64	1111.63	3.32753	33.01	166	177	K	GGVASLTLPAAR	E		0	1	ZP_01444085.1
F056005	P. bermudensis HTCC2601	1966	571.952	2.99472	1712.83	1712.83	-0.142454	67.36	124	140	R	LAADAISKQDPGEGGER	G		1	3	ZP_01444085.1
F056005	P. bermudensis HTCC2601	777	652.338	1.99691	1302.66	1302.66	3.11978	75.09	220	231	R	LGDPQEYAALAR	H		0	2	ZP_01444085.1
F056005	P. bermudensis HTCC2601	3478	749.404	2.99597	2245.19	2245.19	0.691701	67.67	7	31	R	VFLVTGGGSGLGAAVAEMLVGAGGR	A		0	2	ZP_01444085.1
F056005	P. bermudensis HTCC2601	1175	729.343	1.99724	1456.67	1456.67	1.24325	54.51	2	13	M	TYVVTENCIACK	Y		0	2	ZP_01444094.1
F056005	P. bermudensis HTCC2601	5377	1140.25	2.99735	3417.72	3417.71	1.91824	30.69	139	171	K	ALIAPDGSFVEGWGATTRPMSAAITSQVETLLE	-		0	1	ZP_01444106.1
F056005	P. bermudensis HTCC2601	1827	833.935	1.99758	1665.86	1665.85	0.224509	34.61	42	55	R	LLDGDLVNFFVQMR	G		0	1	ZP_01444150.1
F056005	P. bermudensis HTCC2601	4521	679.332	3.99407	2713.3	2713.29	2.11109	42.94	70	93	K	LCEAICPAQAITIDAEPRDDGSRR	T		2	2	ZP_01444152.1
F056005	P. bermudensis HTCC2601	321	545.781	1.99631	1089.55	1089.55	2.5763	32.51	156	164	R	NLELDAPYR	-		0	2	ZP_01444152.1
[truncated: 10,065 more rows]
